# Supplementary material
Source: publisher figshare collection journal article supplement (https://acs.figshare.com/ndownloader/files/4631242)

## Supporting Information for

### Photoaddition Reactions of 1,2-Diketones with Silyl Ketene Acetals. Formation of $\beta$ -Hydroxy- $\gamma$ -ketoesters.

Dae Won Cho<sup>1</sup>, Hyang-Yeol Lee<sup>1</sup>, Sun Wha Oh<sup>2</sup>, Jung Hei Choi<sup>1</sup>, Hea Jung Park<sup>1</sup>,

Patrick S. Mariano<sup>3</sup>, Ung Chan Yoon<sup>1\*</sup>

<sup>1</sup>*Department of Chemistry and Chemistry Institute for Functional Materials,*

*Pusan National University, Busan, 609-735, Korea*

<sup>2</sup>*Basic Science Research Institute, Pukyong National University, Busan, 608-737, Korea*

<sup>3</sup>*Department of Chemistry and Chemical Biology, University of New Mexico, Albuquerque, New*

*Mexico 87131, USA*

| Content                  | page       |
|--------------------------|------------|
| General procedure        | S-1        |
| NMR Spectra of Compounds | S-2 ~ S-77 |

## ***General Procedure***

The Chemical shifts of resonances in the  $^1\text{H}$ - and  $^{13}\text{C}$ -NMR (300 MHz) spectra were recorded on  $\text{CDCl}_3$  solutions and are reported in parts per million relative to  $\text{CHCl}_3$  peak (7.24 ppm) as an internal standard. IR spectral bands are reported in  $\text{cm}^{-1}$ . Preparative photochemical reactions were conducted with an apparatus consisting of a 450 W Hanovia medium vapor pressure mercury lamp surrounded by a Uranium glass filter in a water-cooled quartz immersion well surrounded by the solution being irradiated. The photolysis solutions were purged with nitrogen before and during irradiations. The photolysates were concentrated under reduced pressure giving residues which were subjected to silica gel column chromatography. High resolution (HRMS) mass spectra were obtained by use of electron impact ionization unless otherwise noted. All starting materials used in the photoreactions derived from commercial sources. All new compounds described are isolated as oils in >90% purity (by NMR analysis) unless noted otherwise.

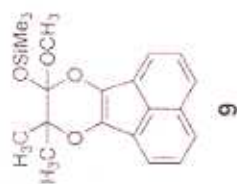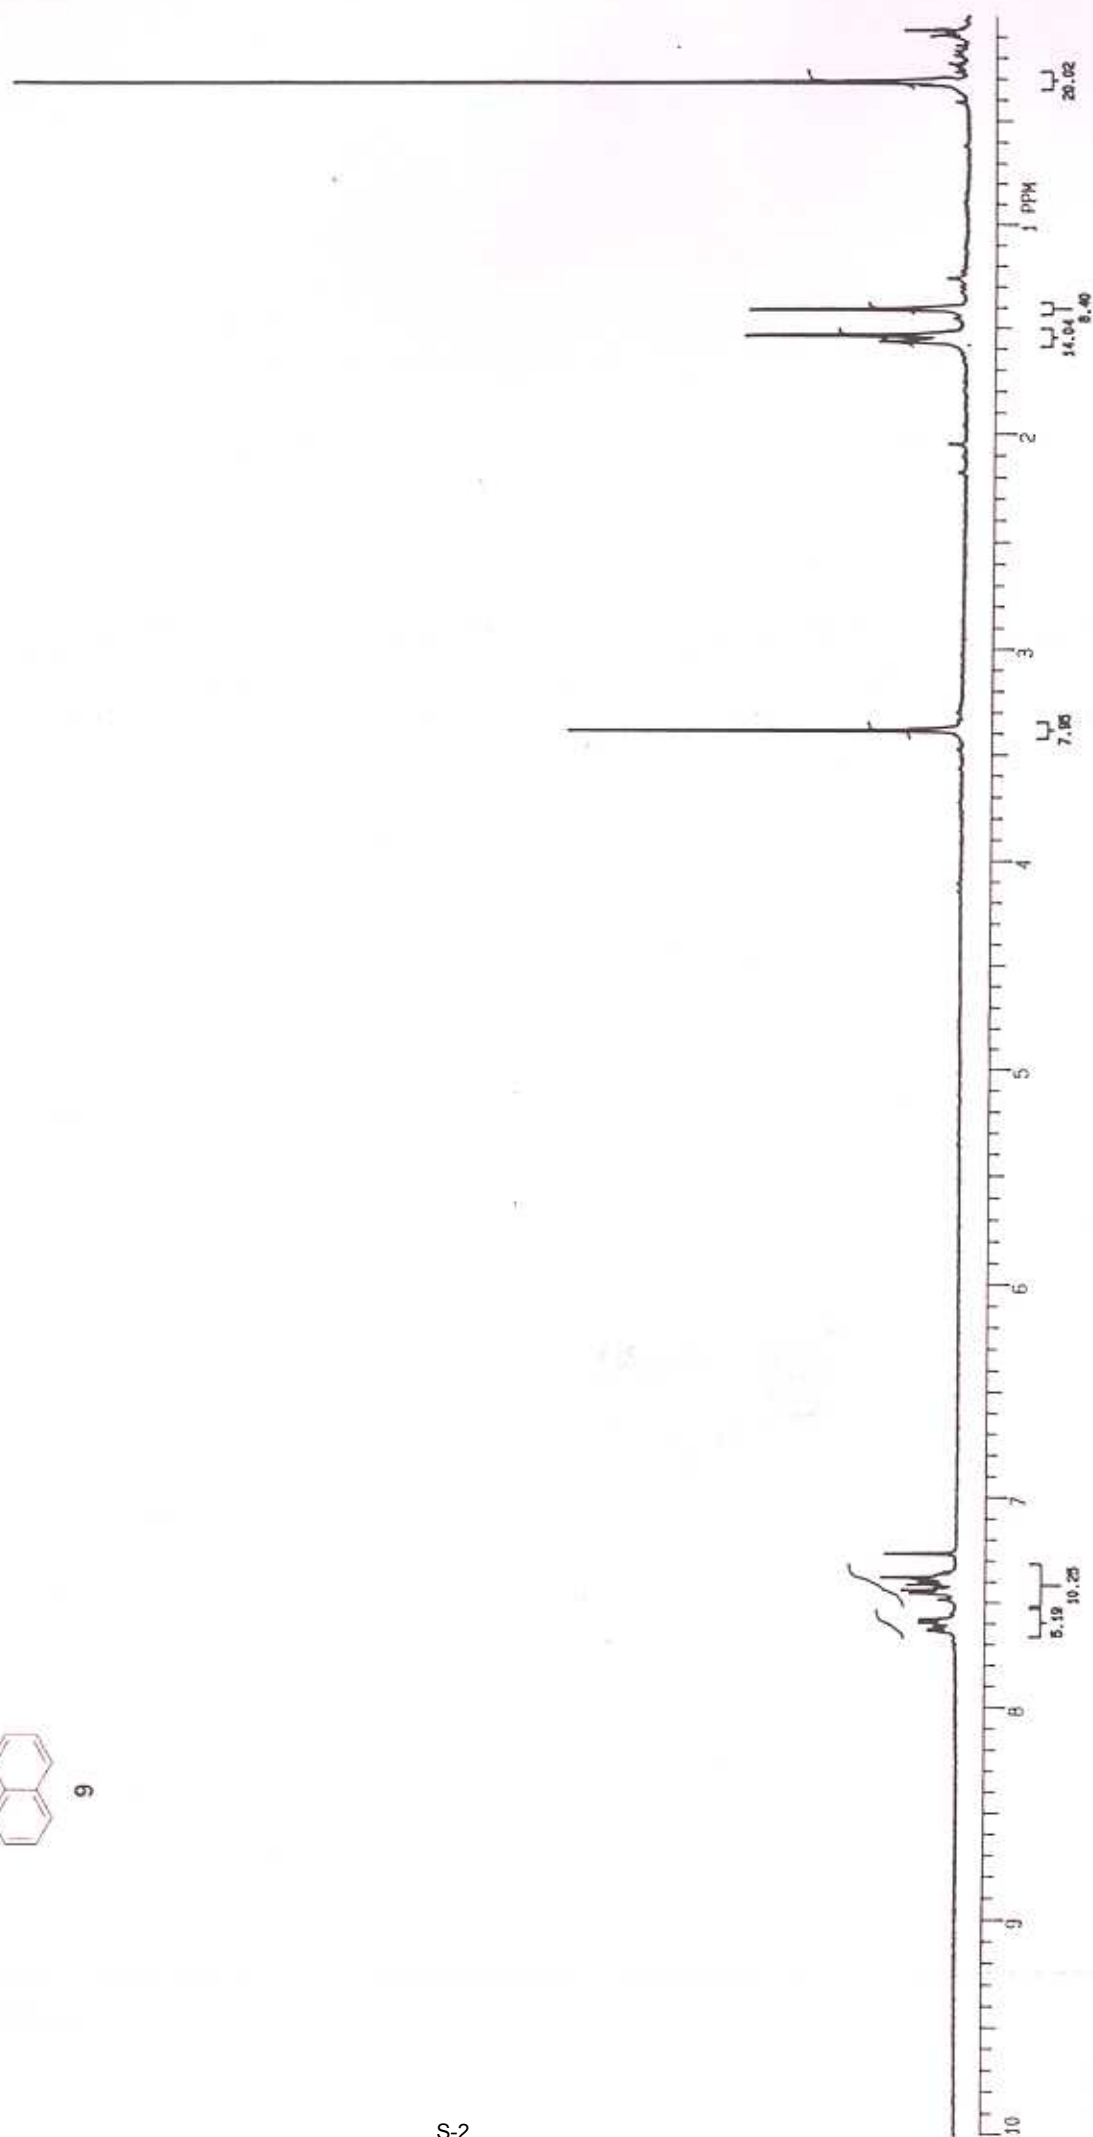

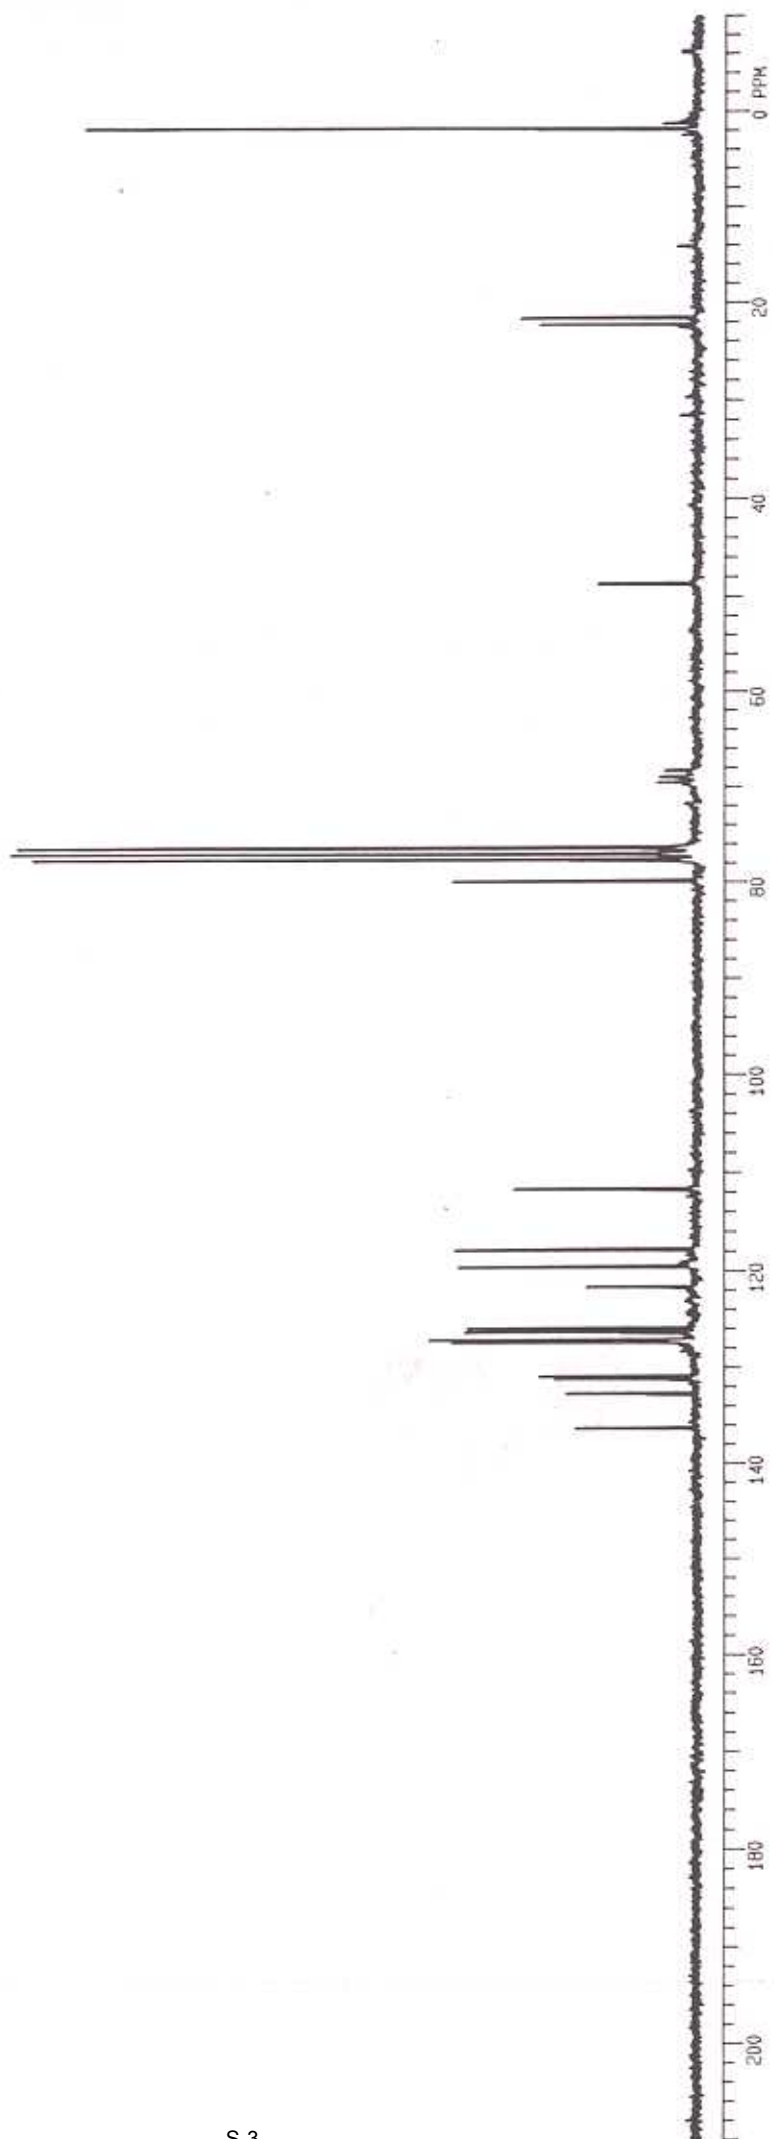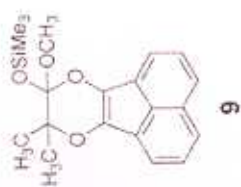



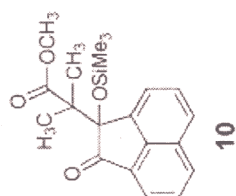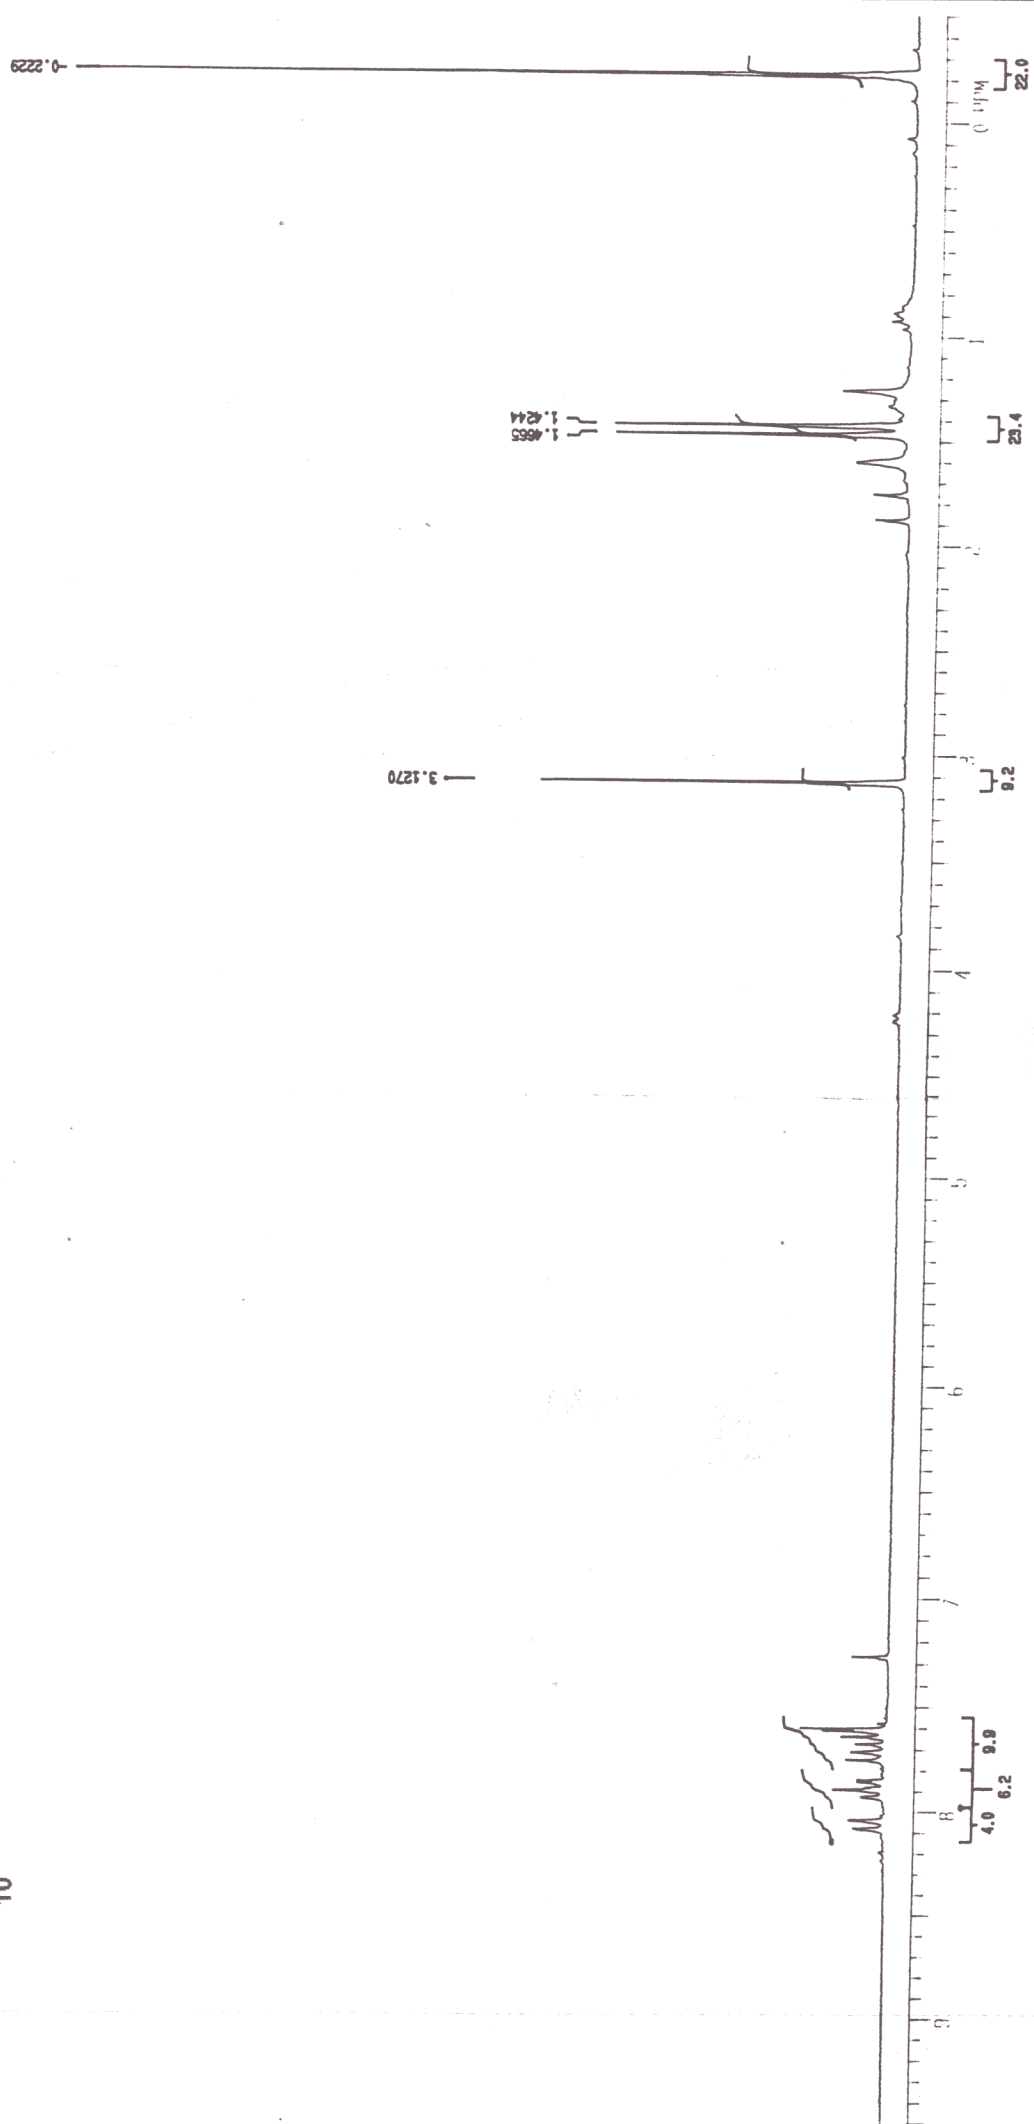

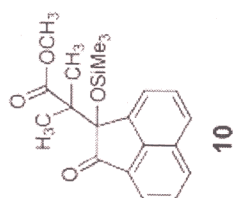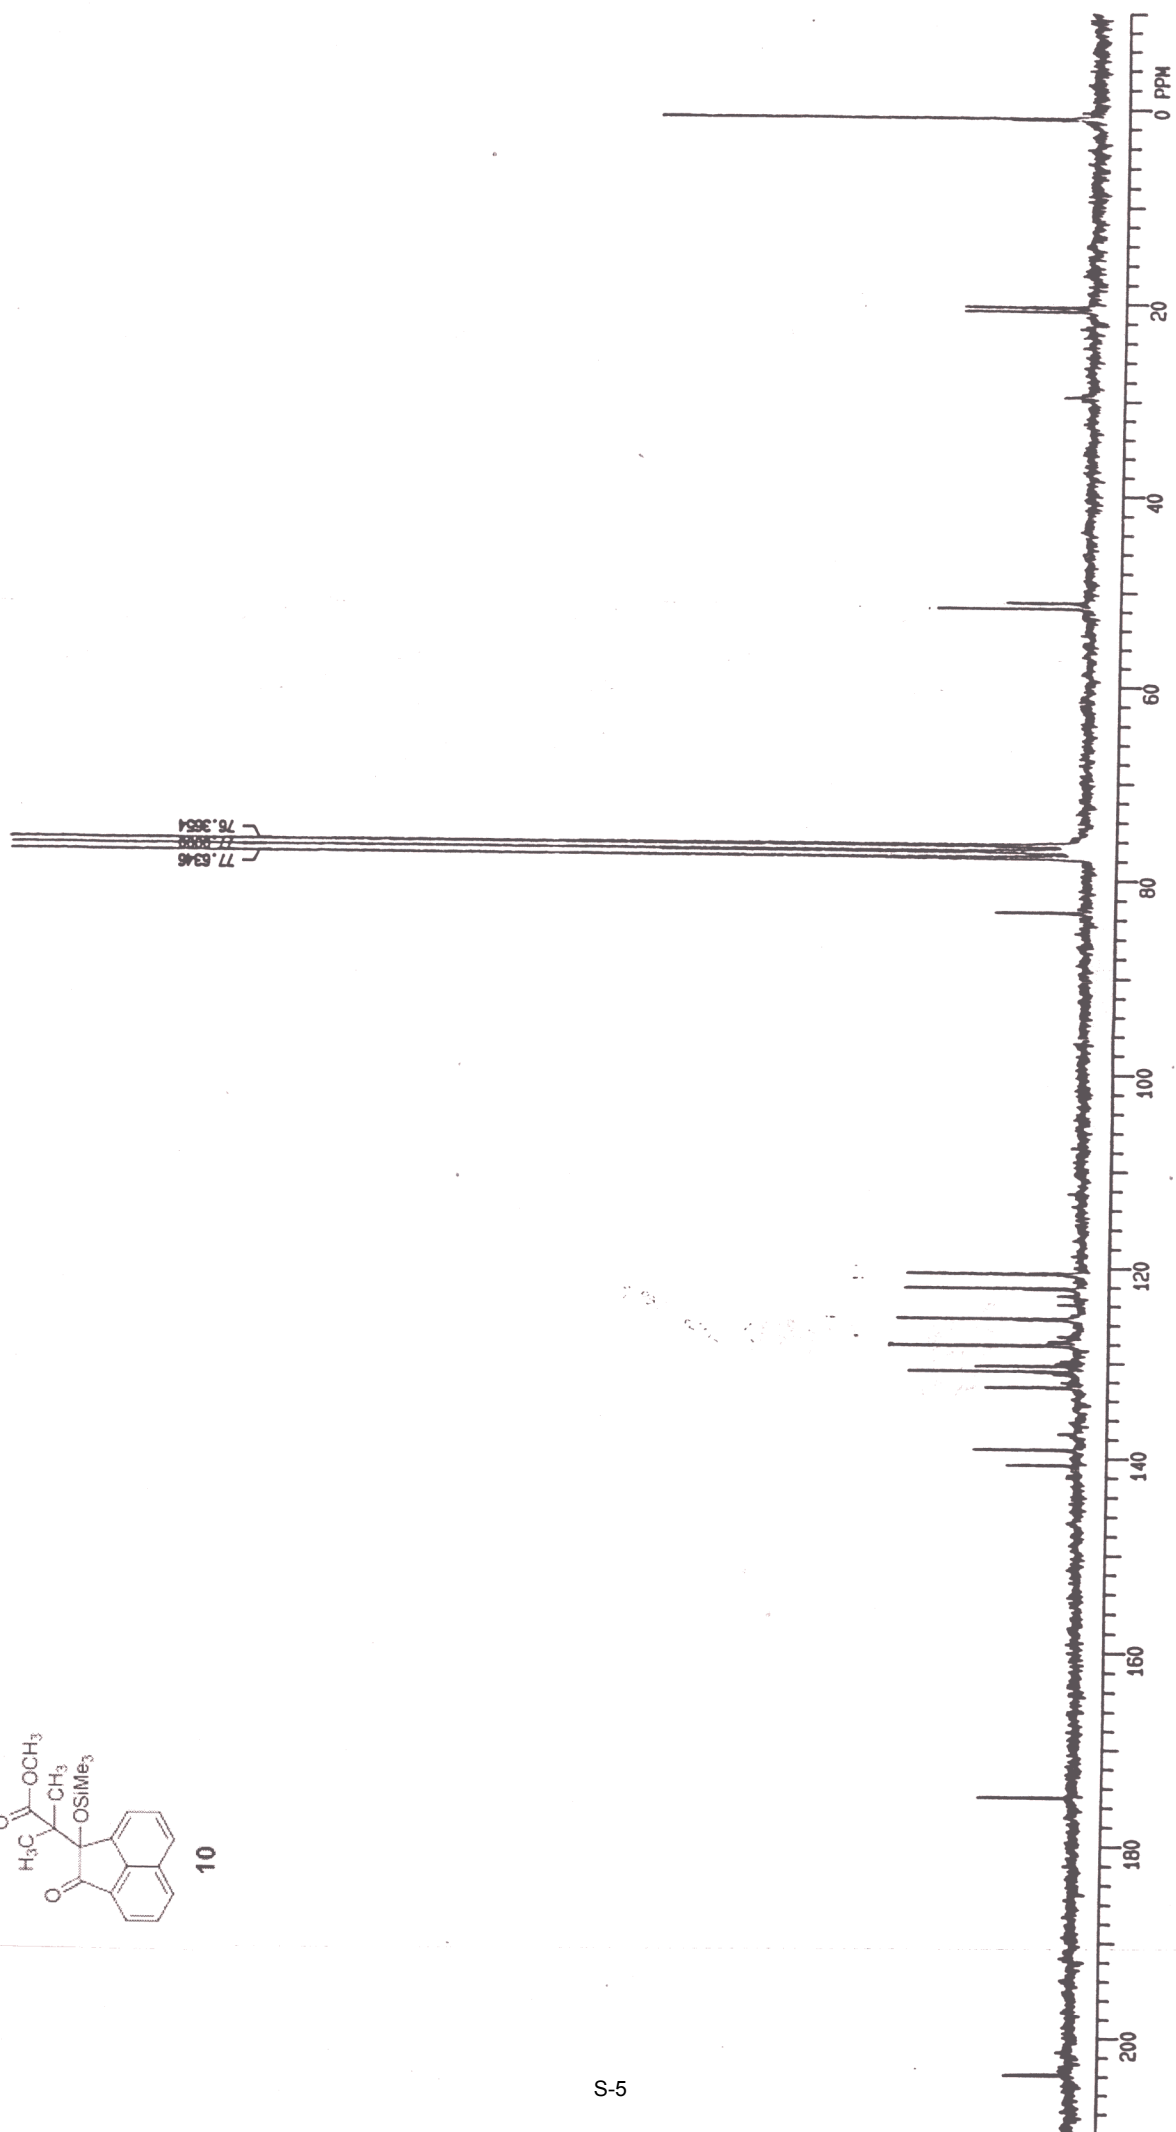

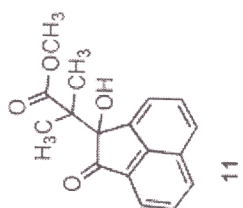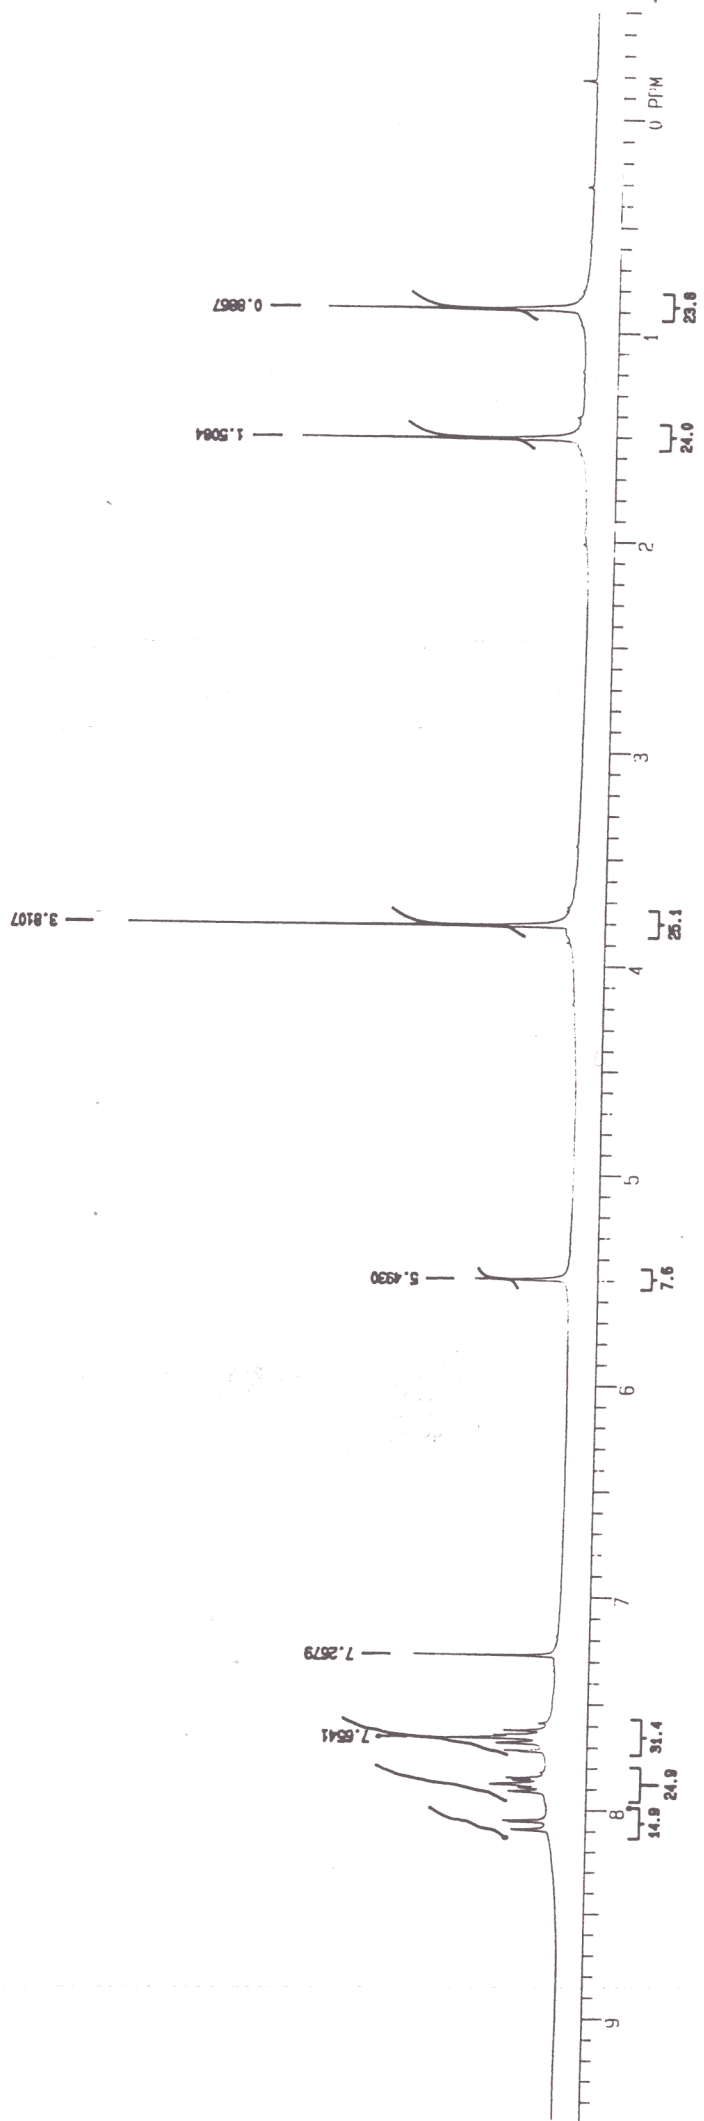

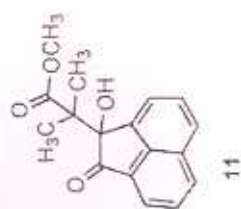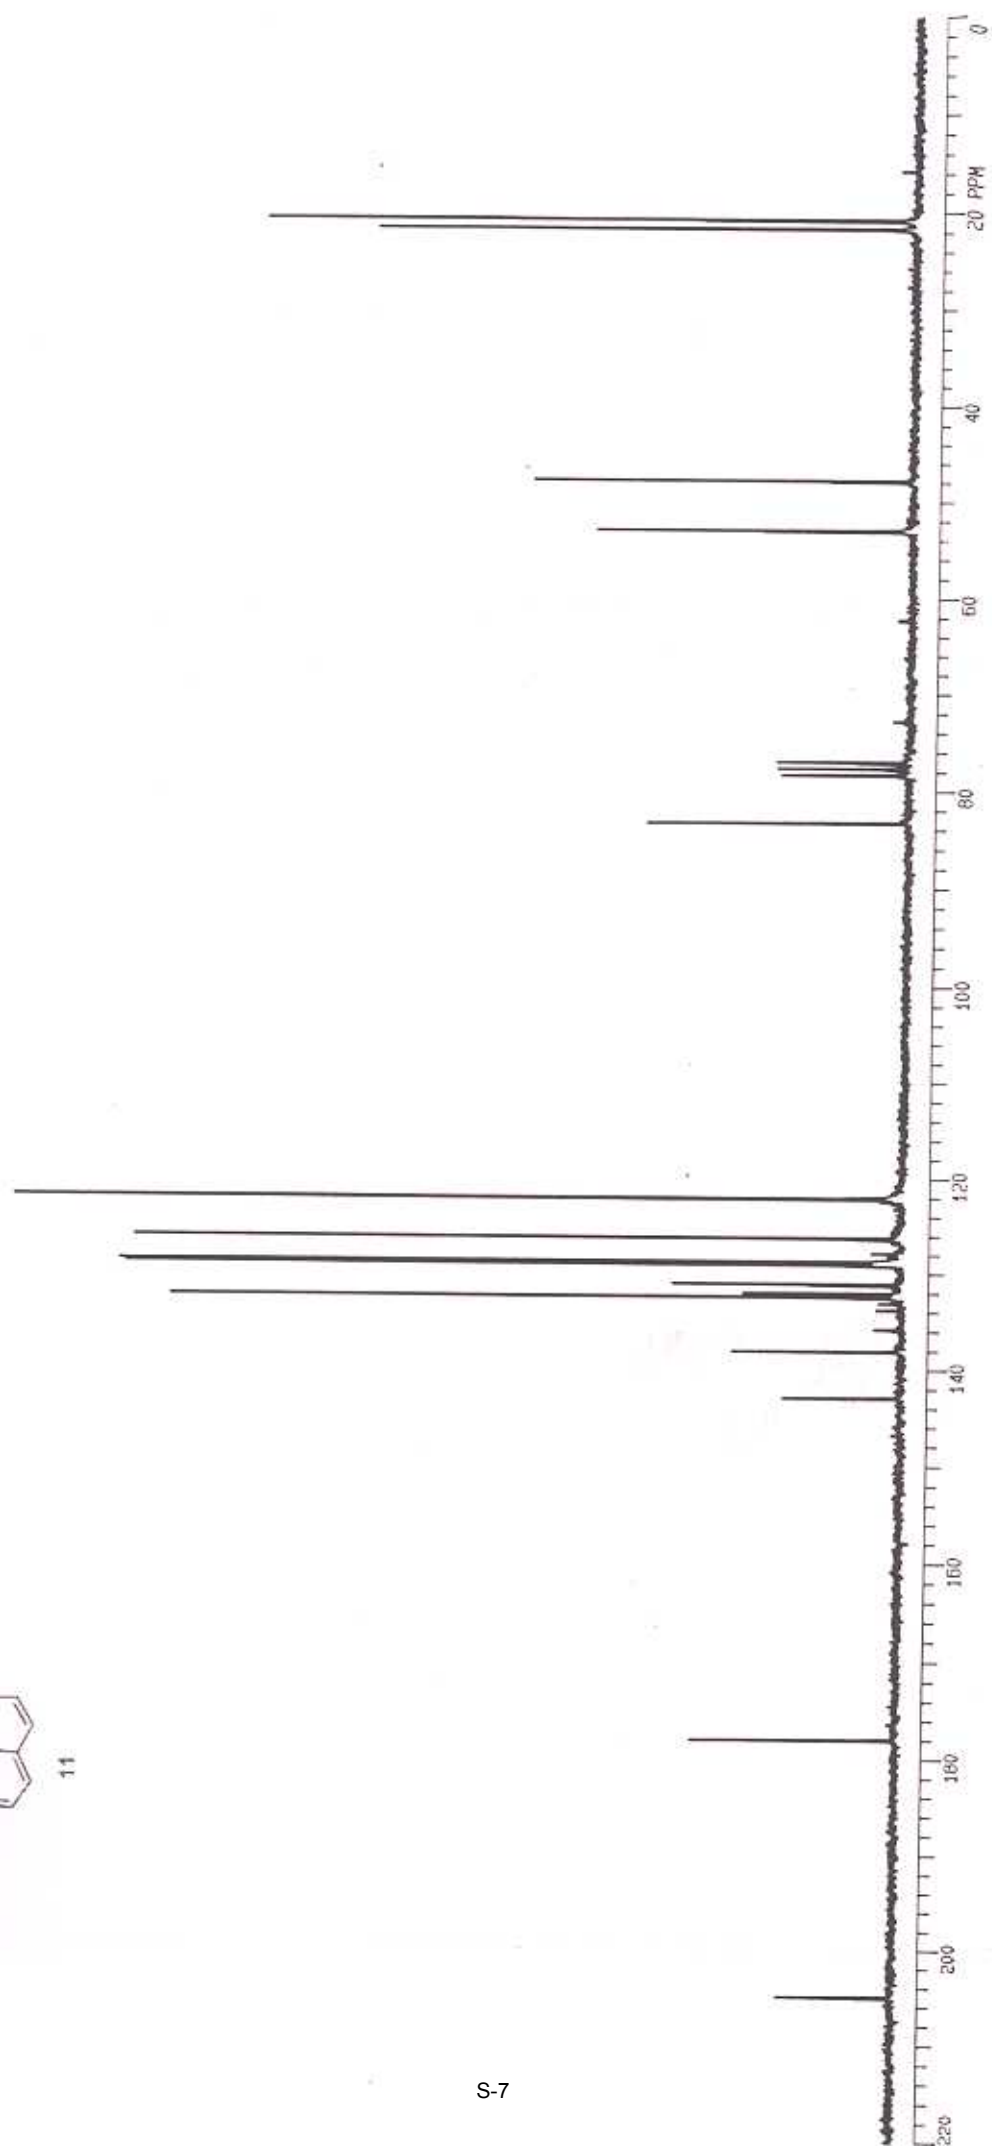

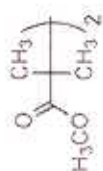

12

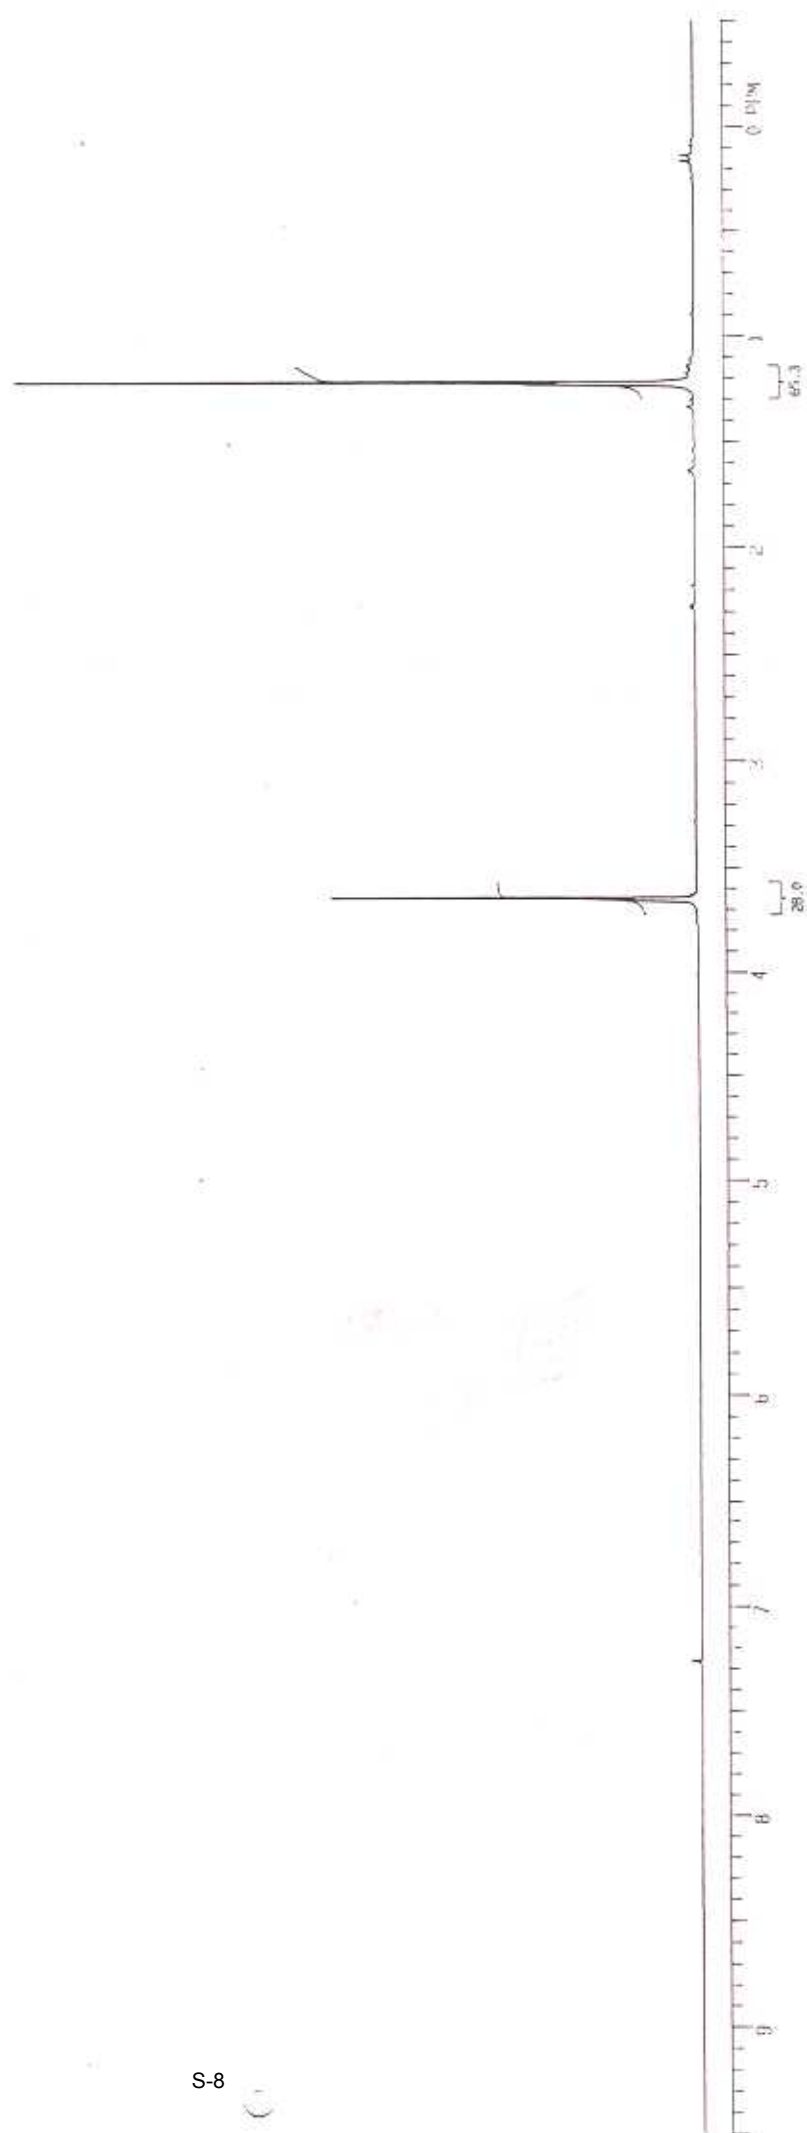

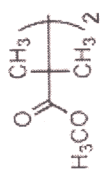

12

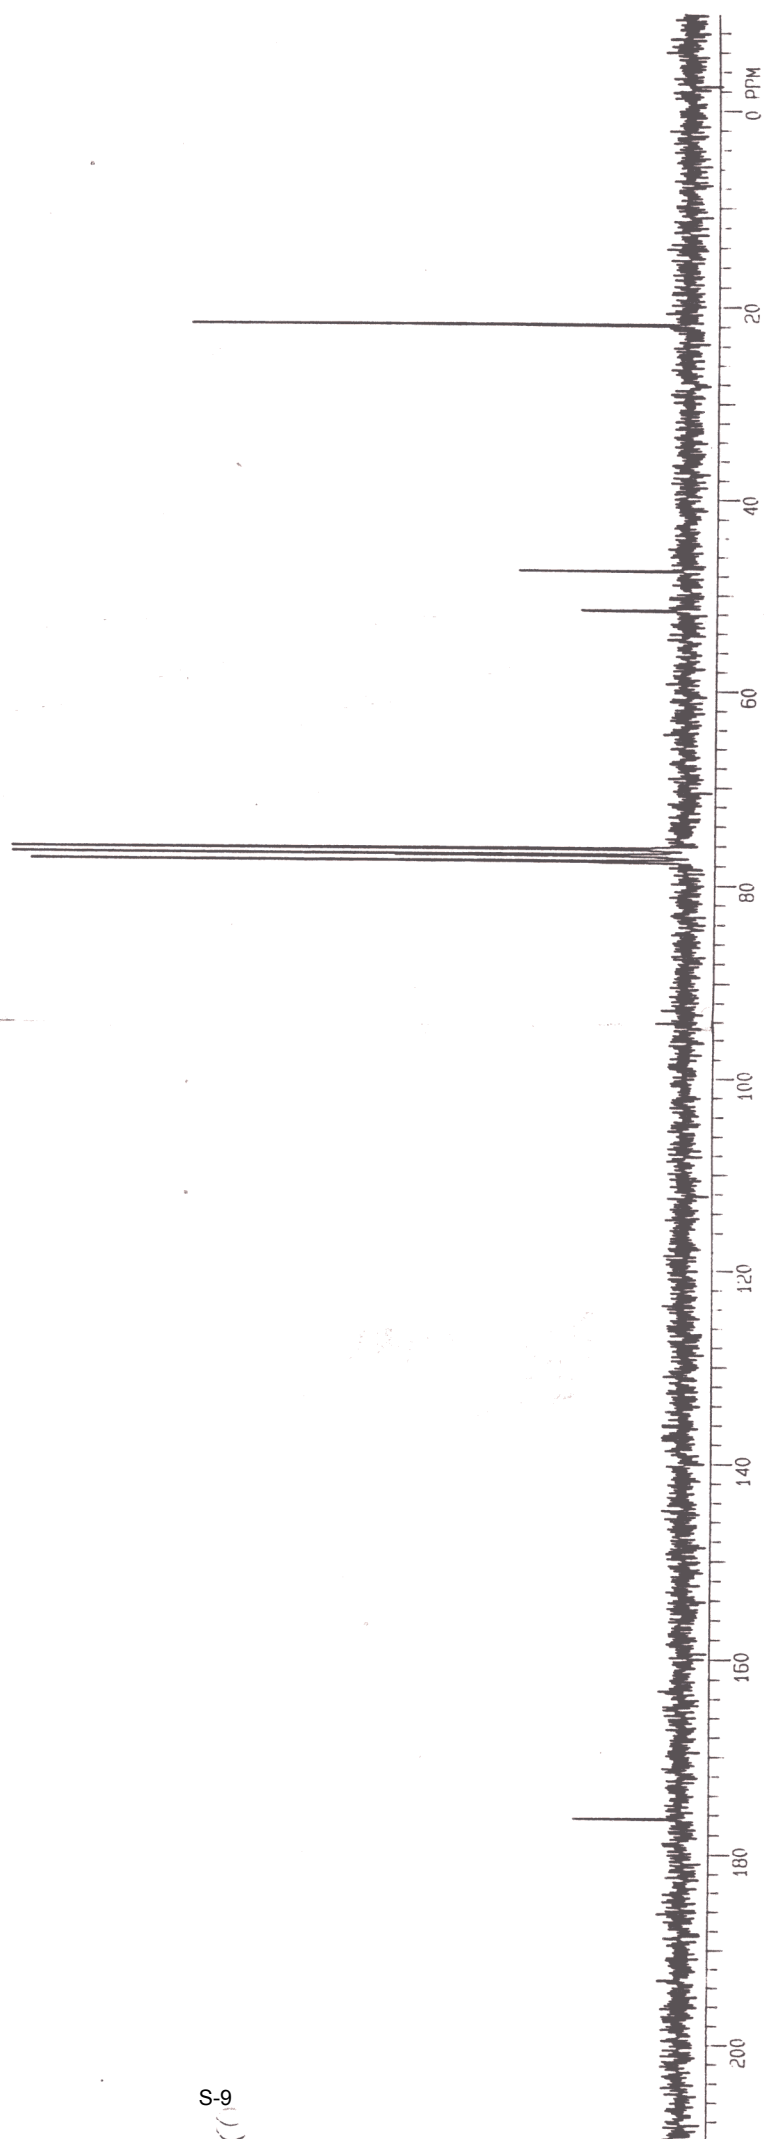

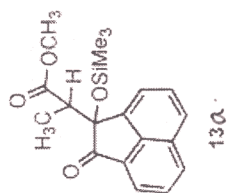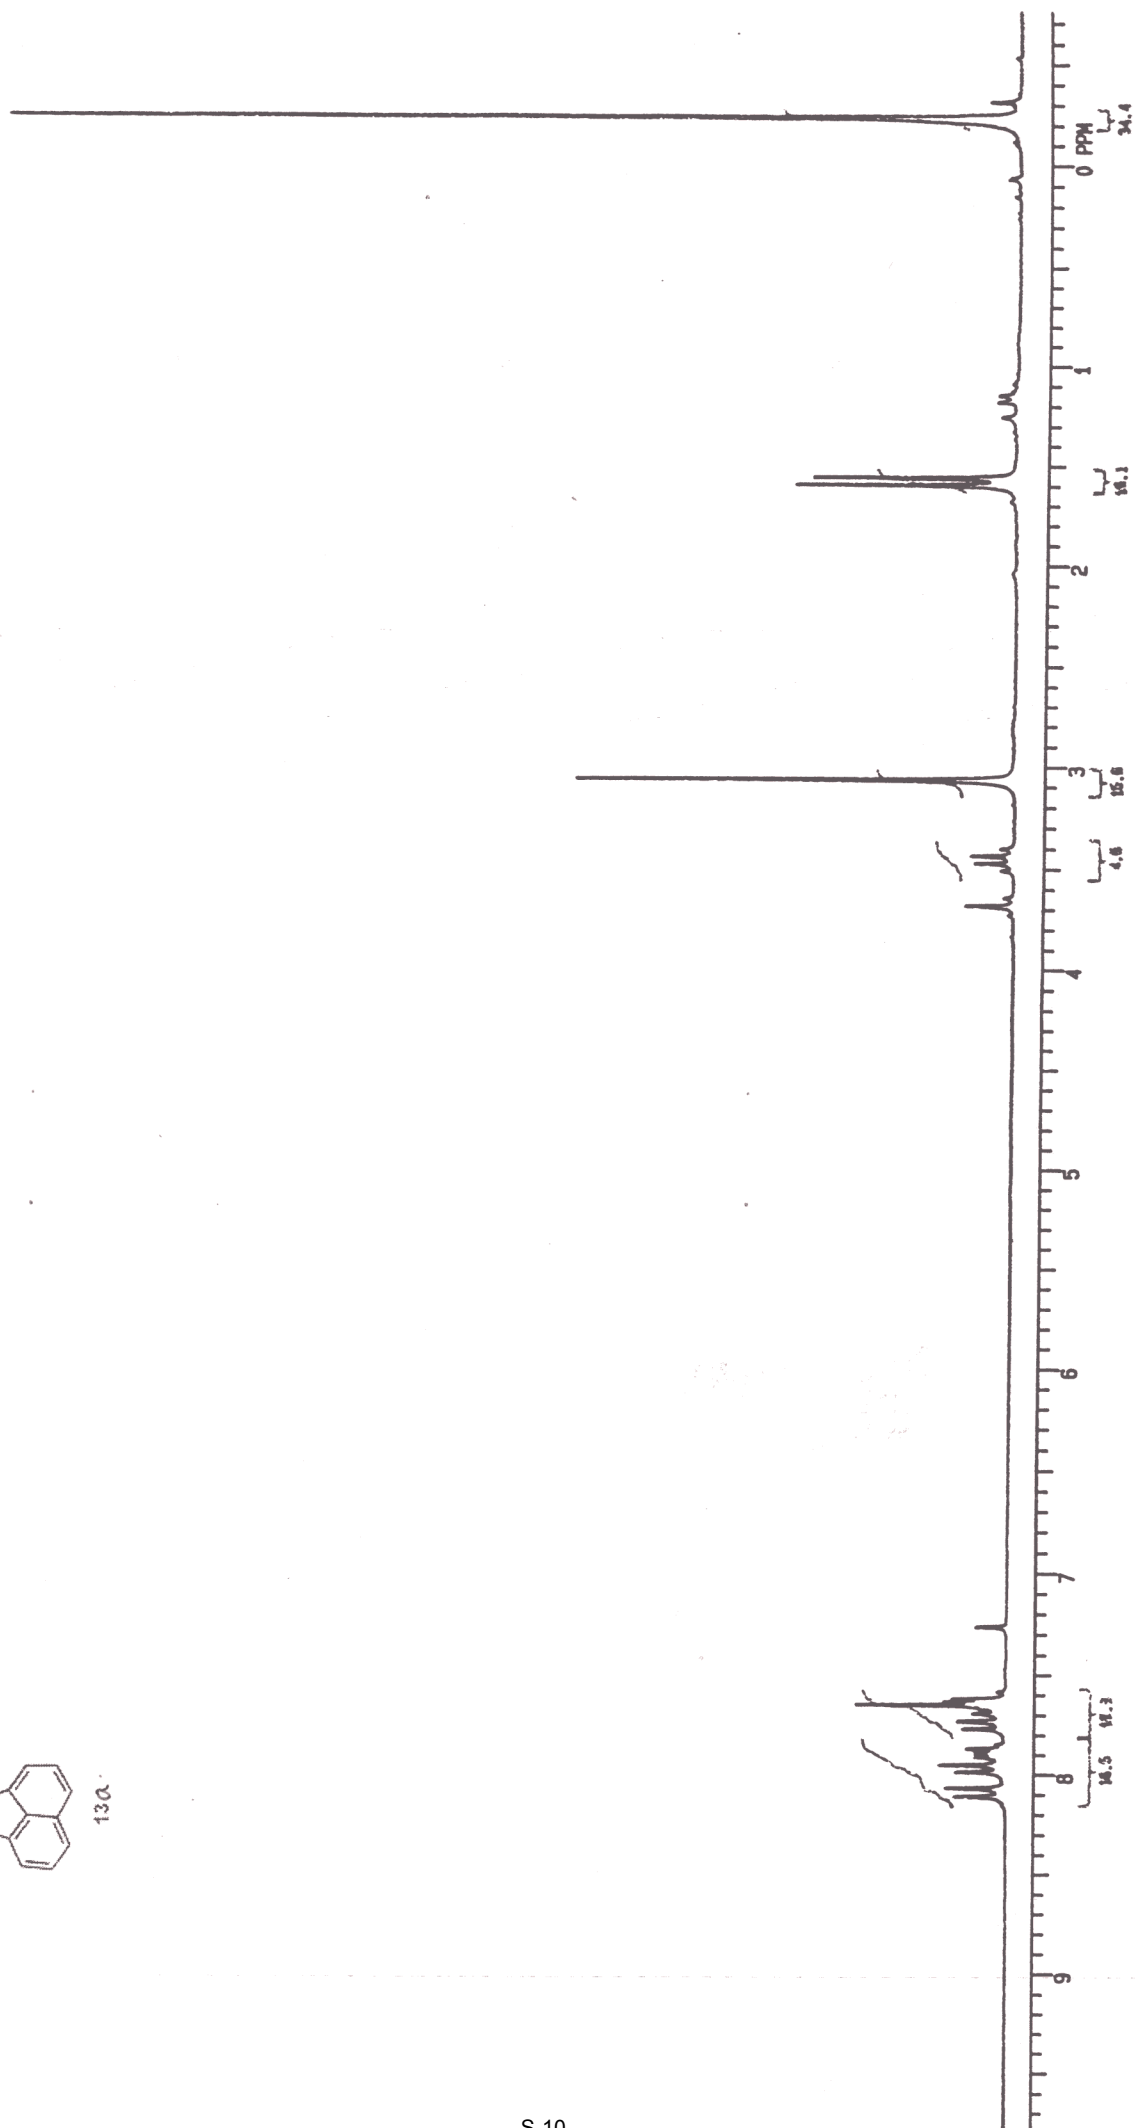

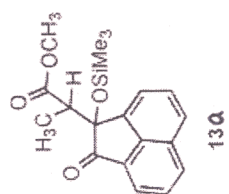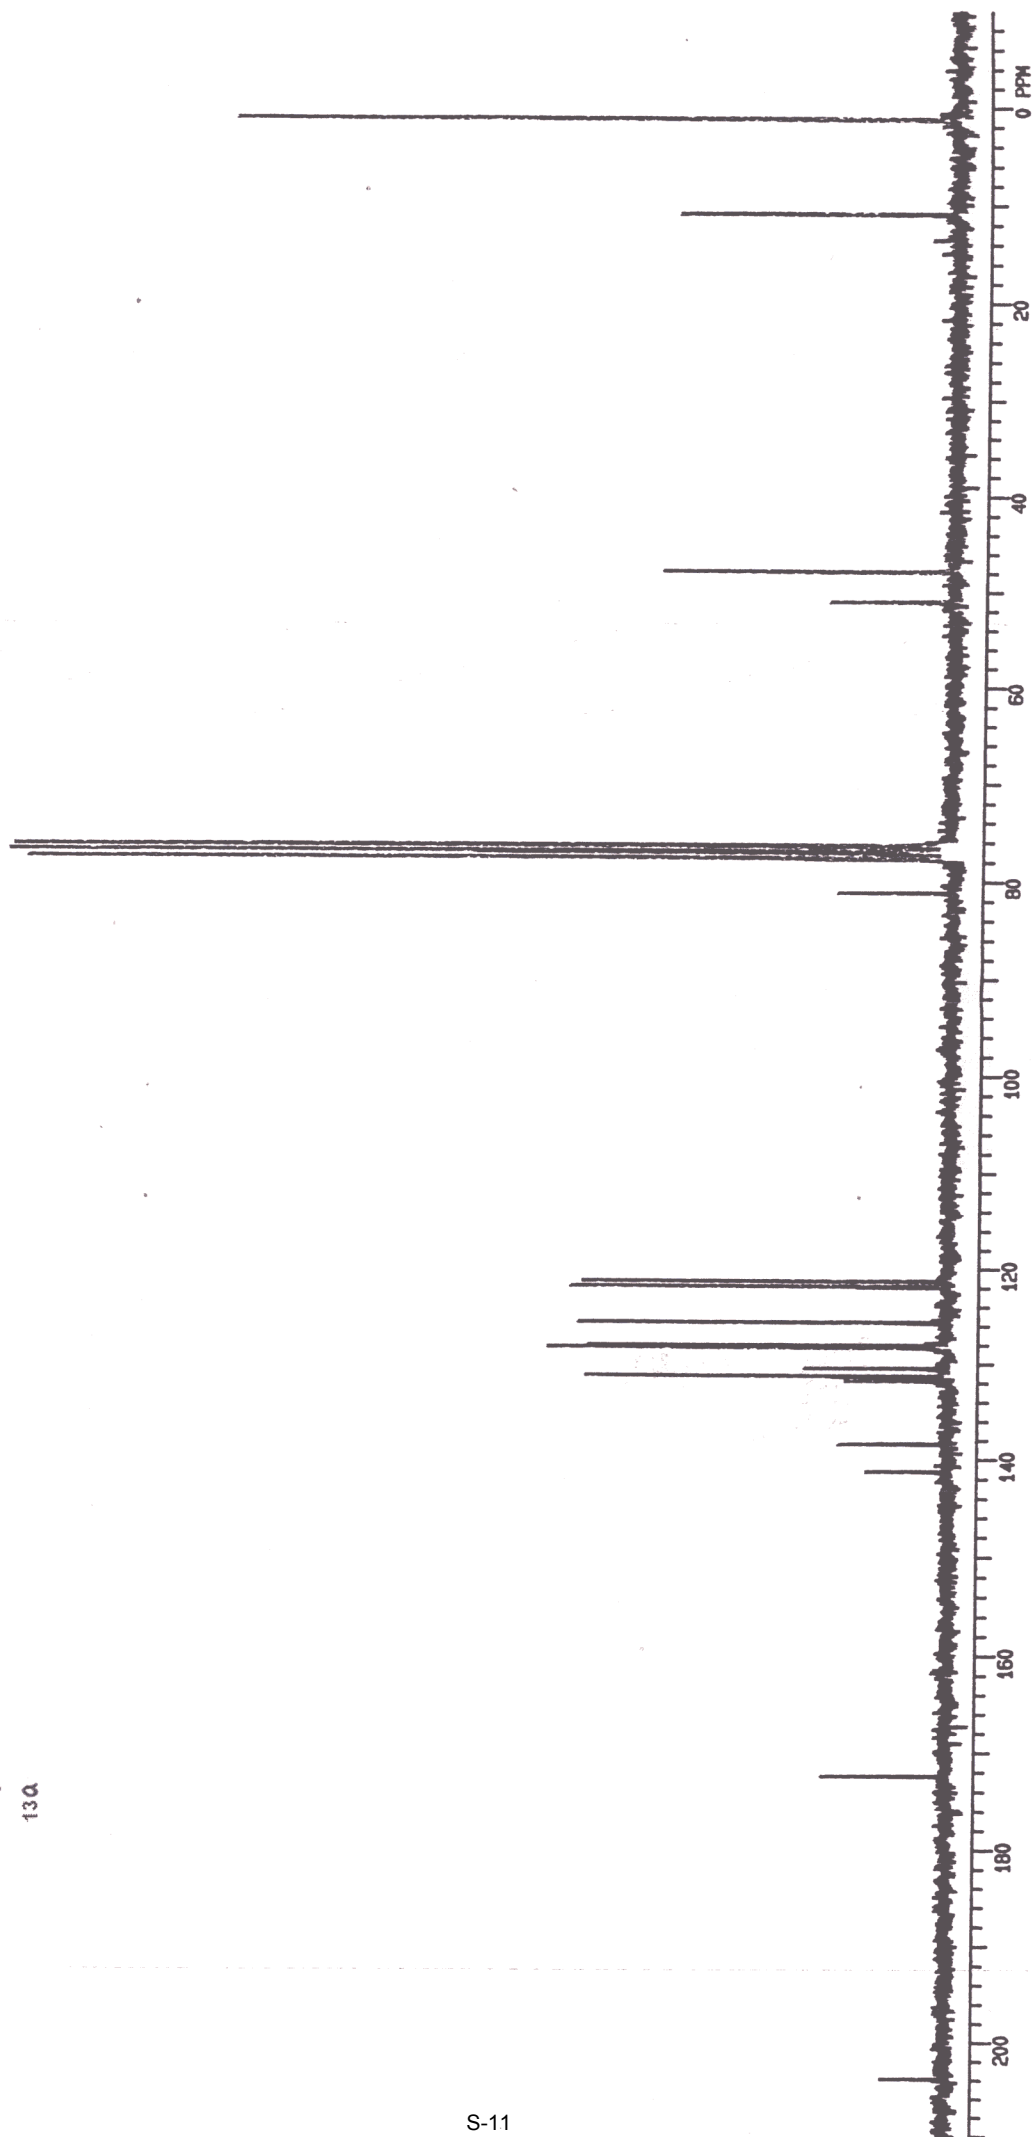



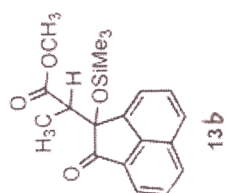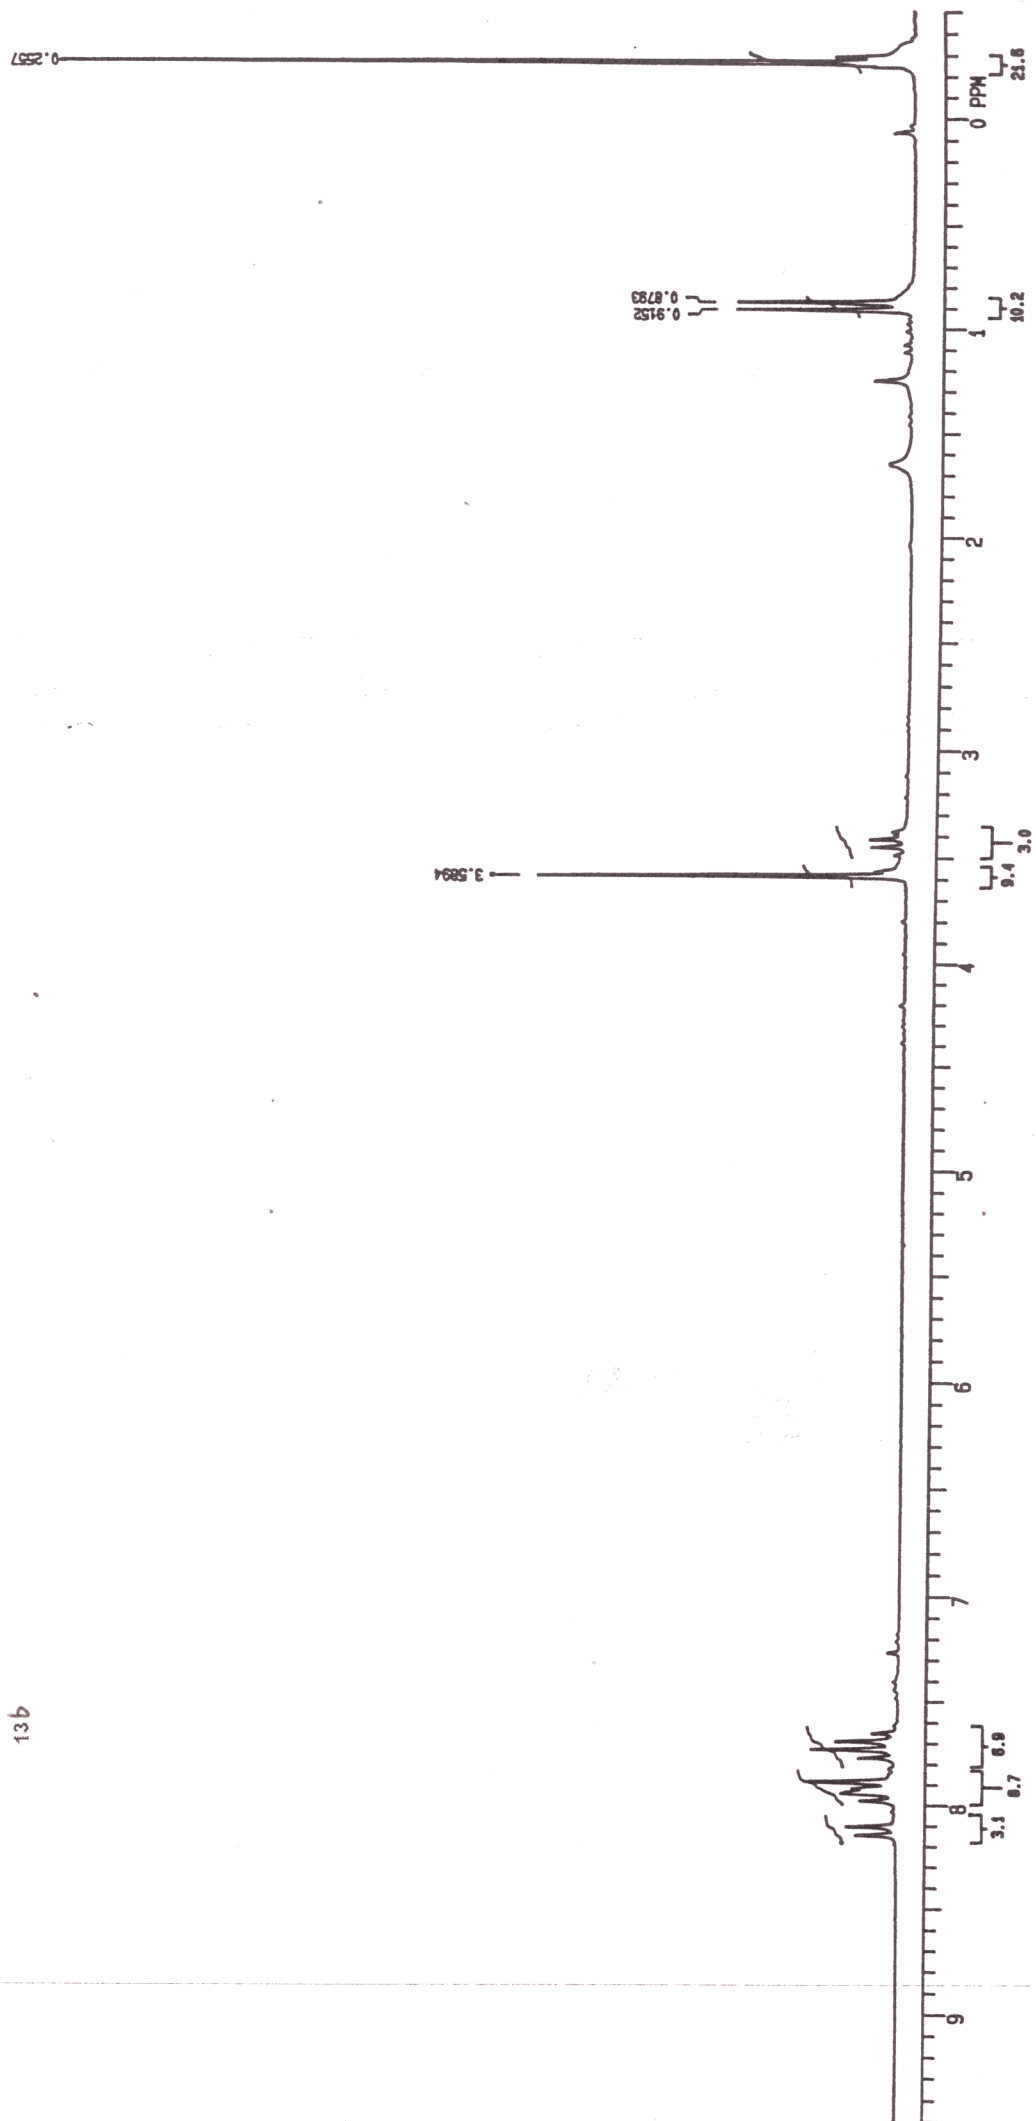

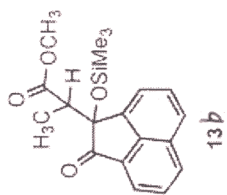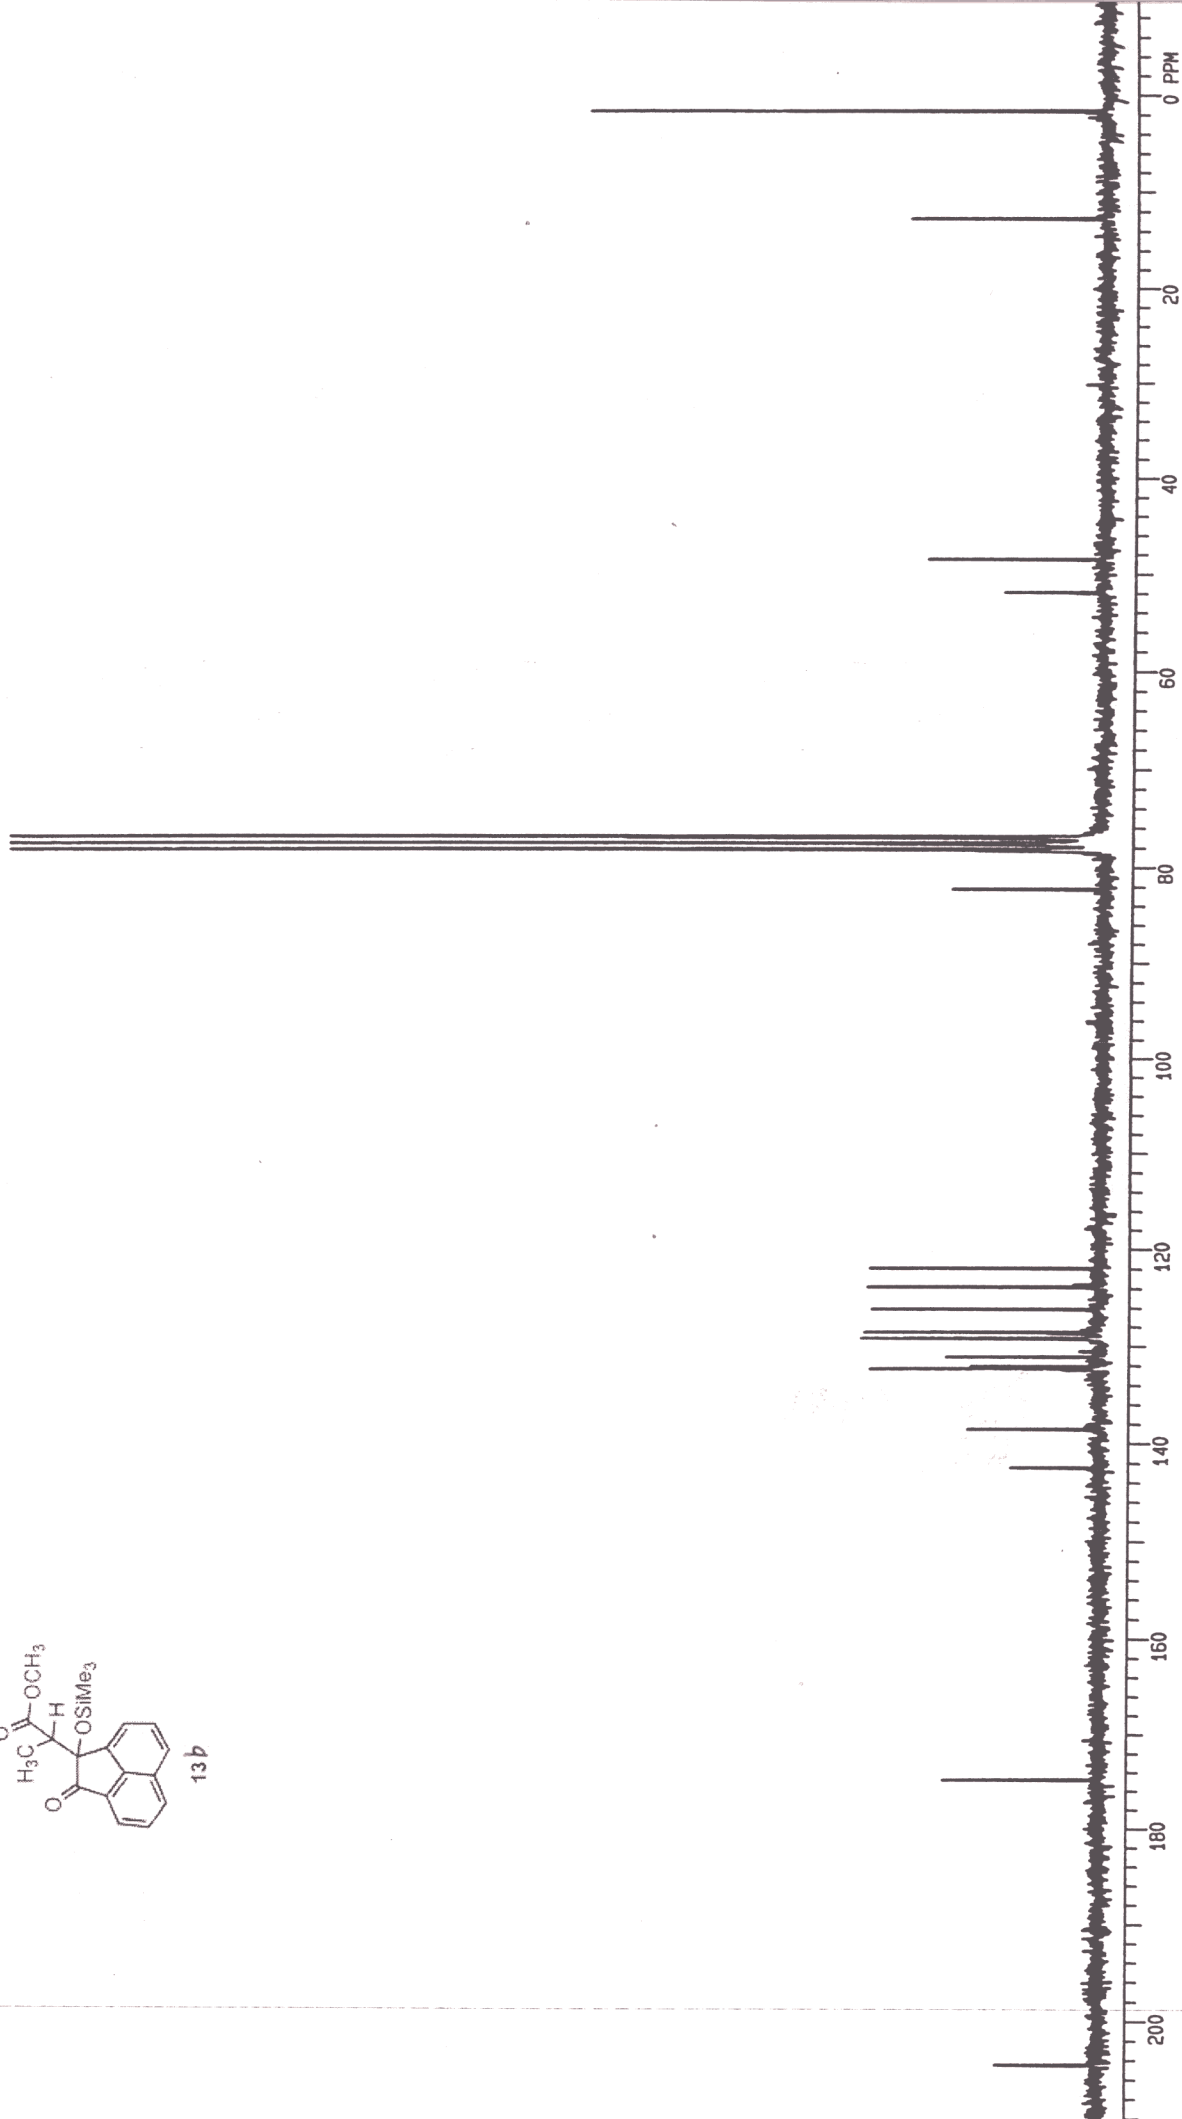

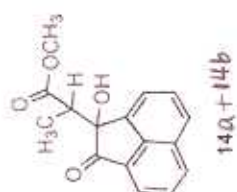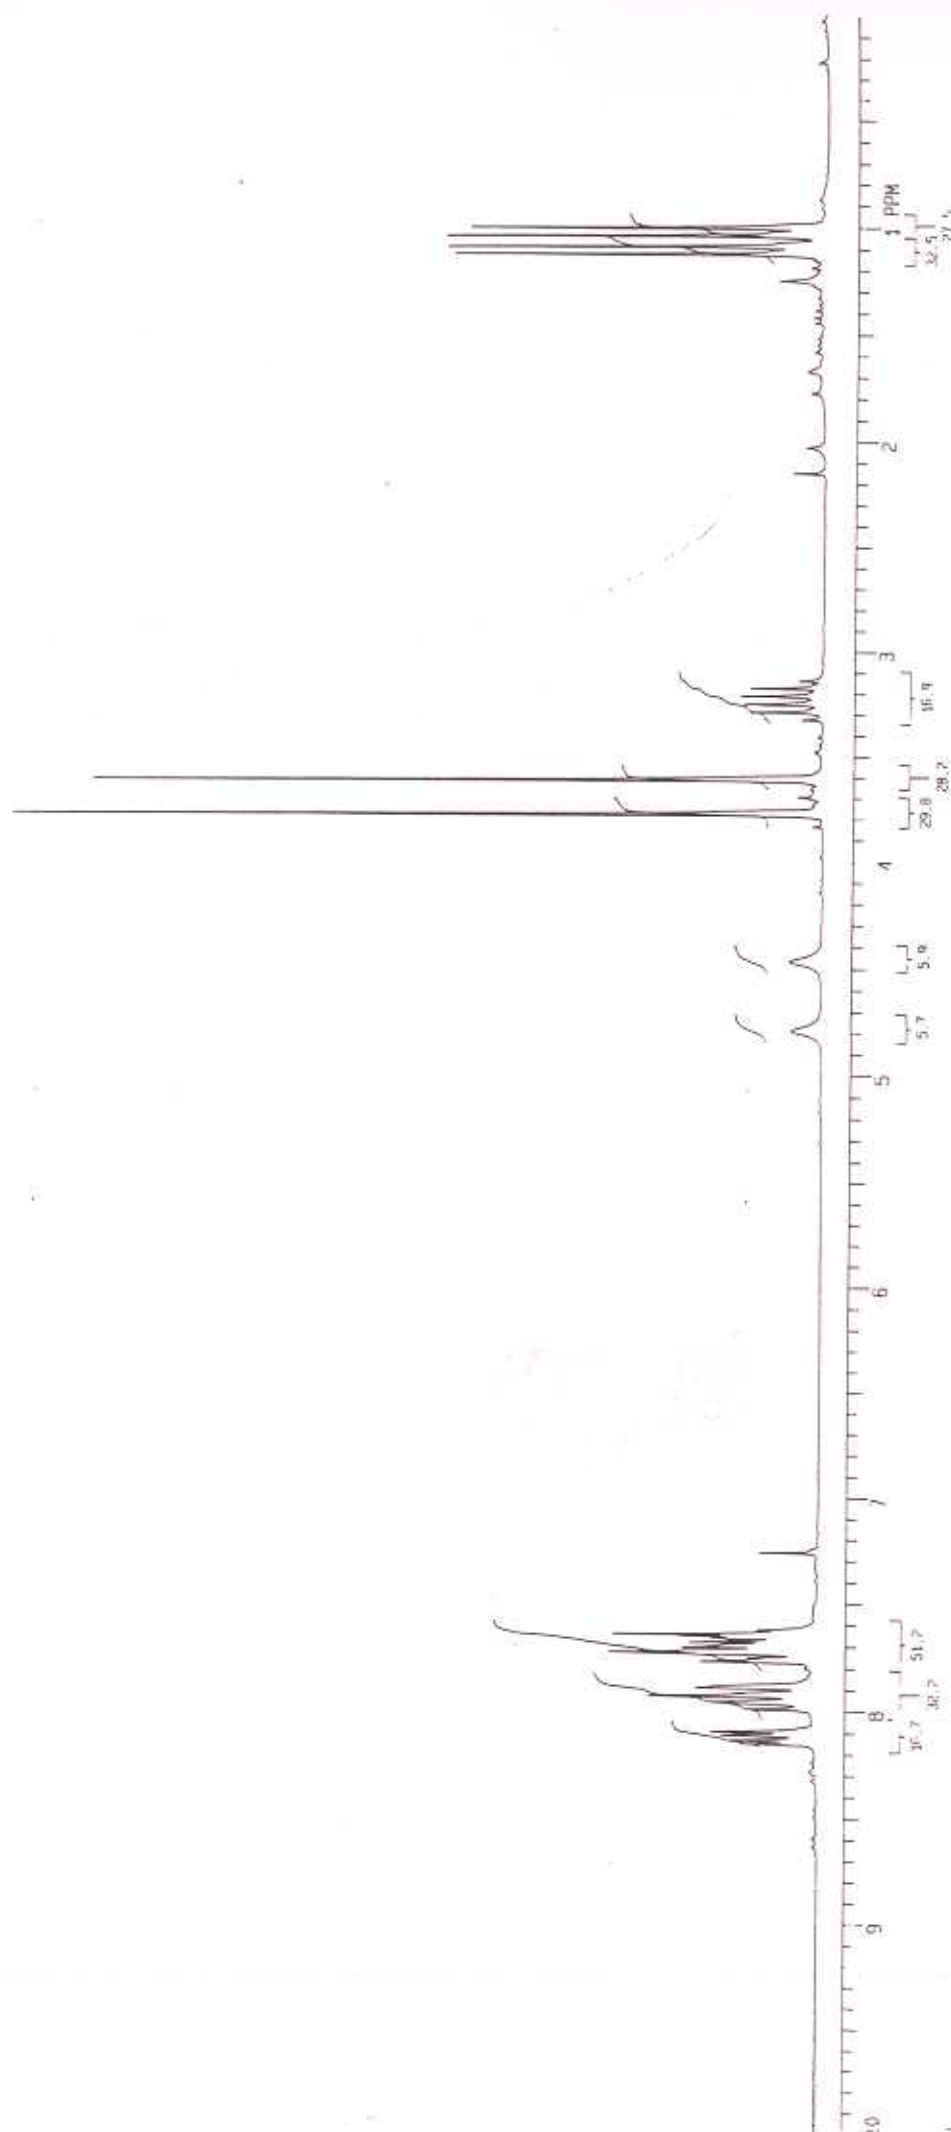

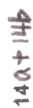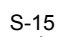

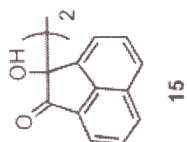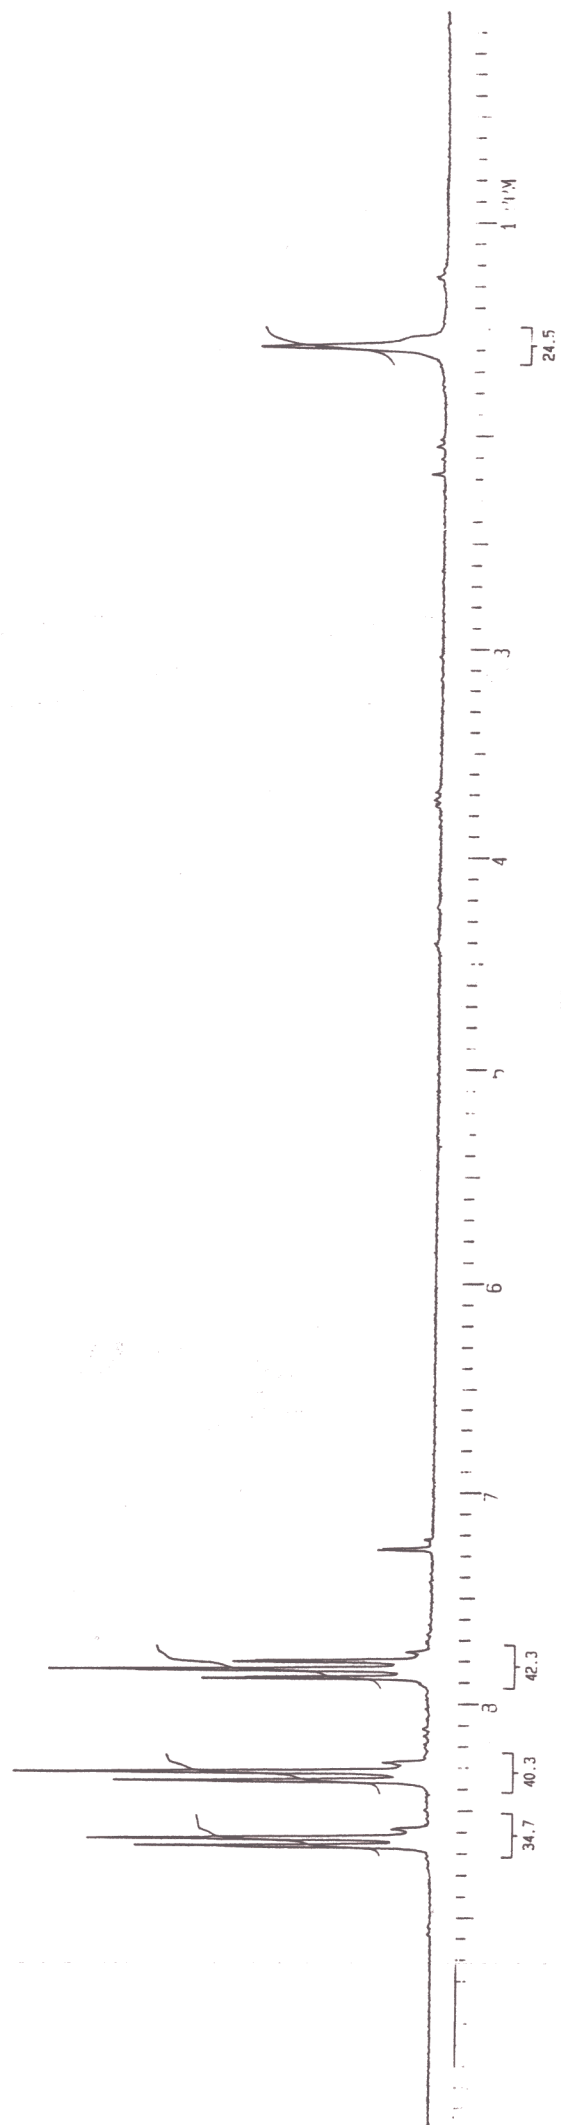

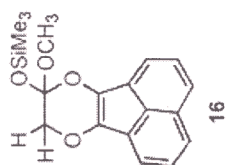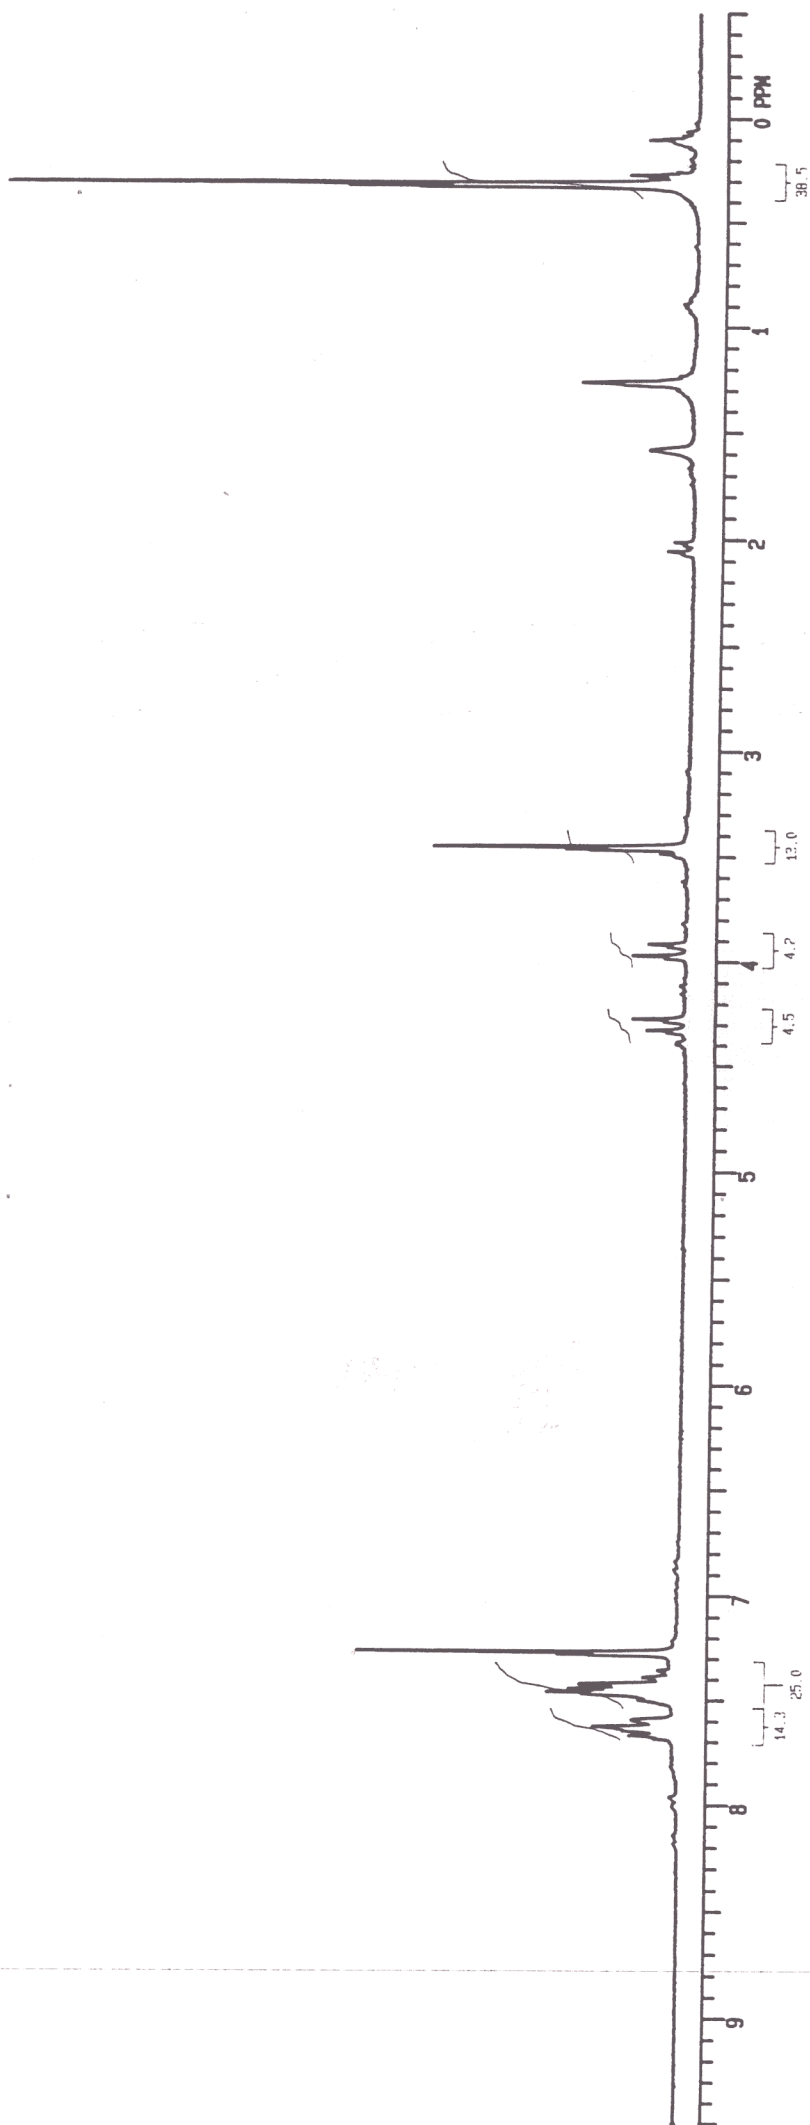

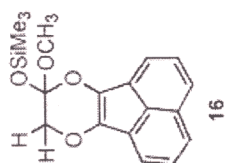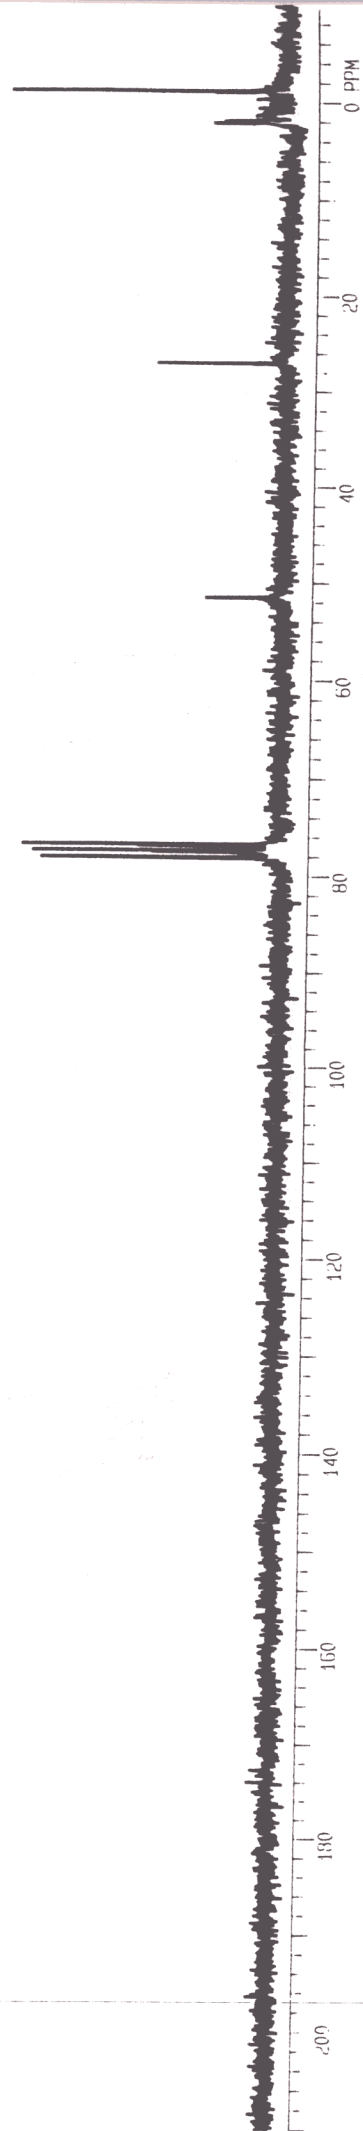

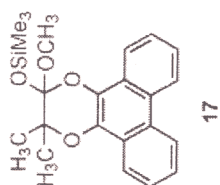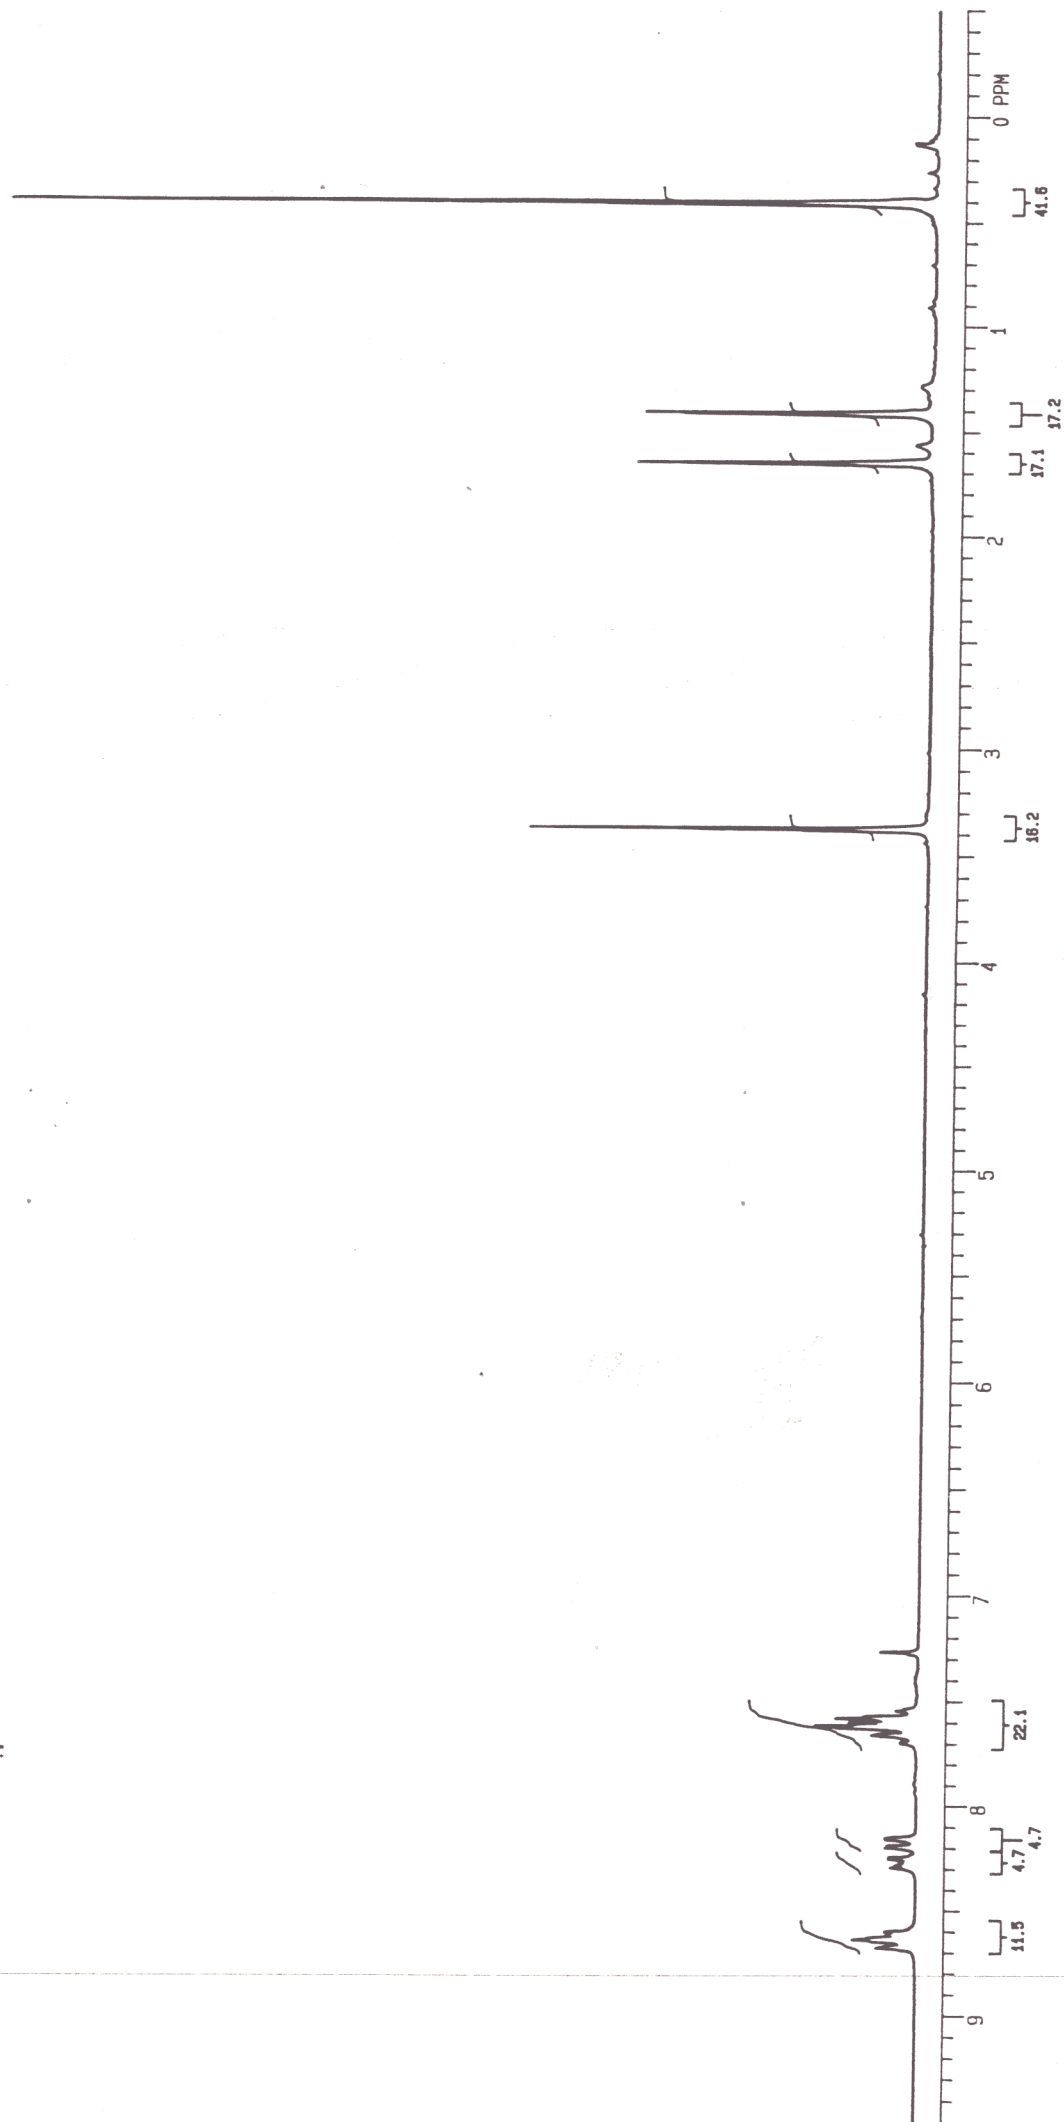



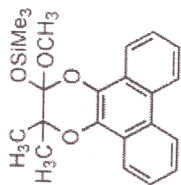

17

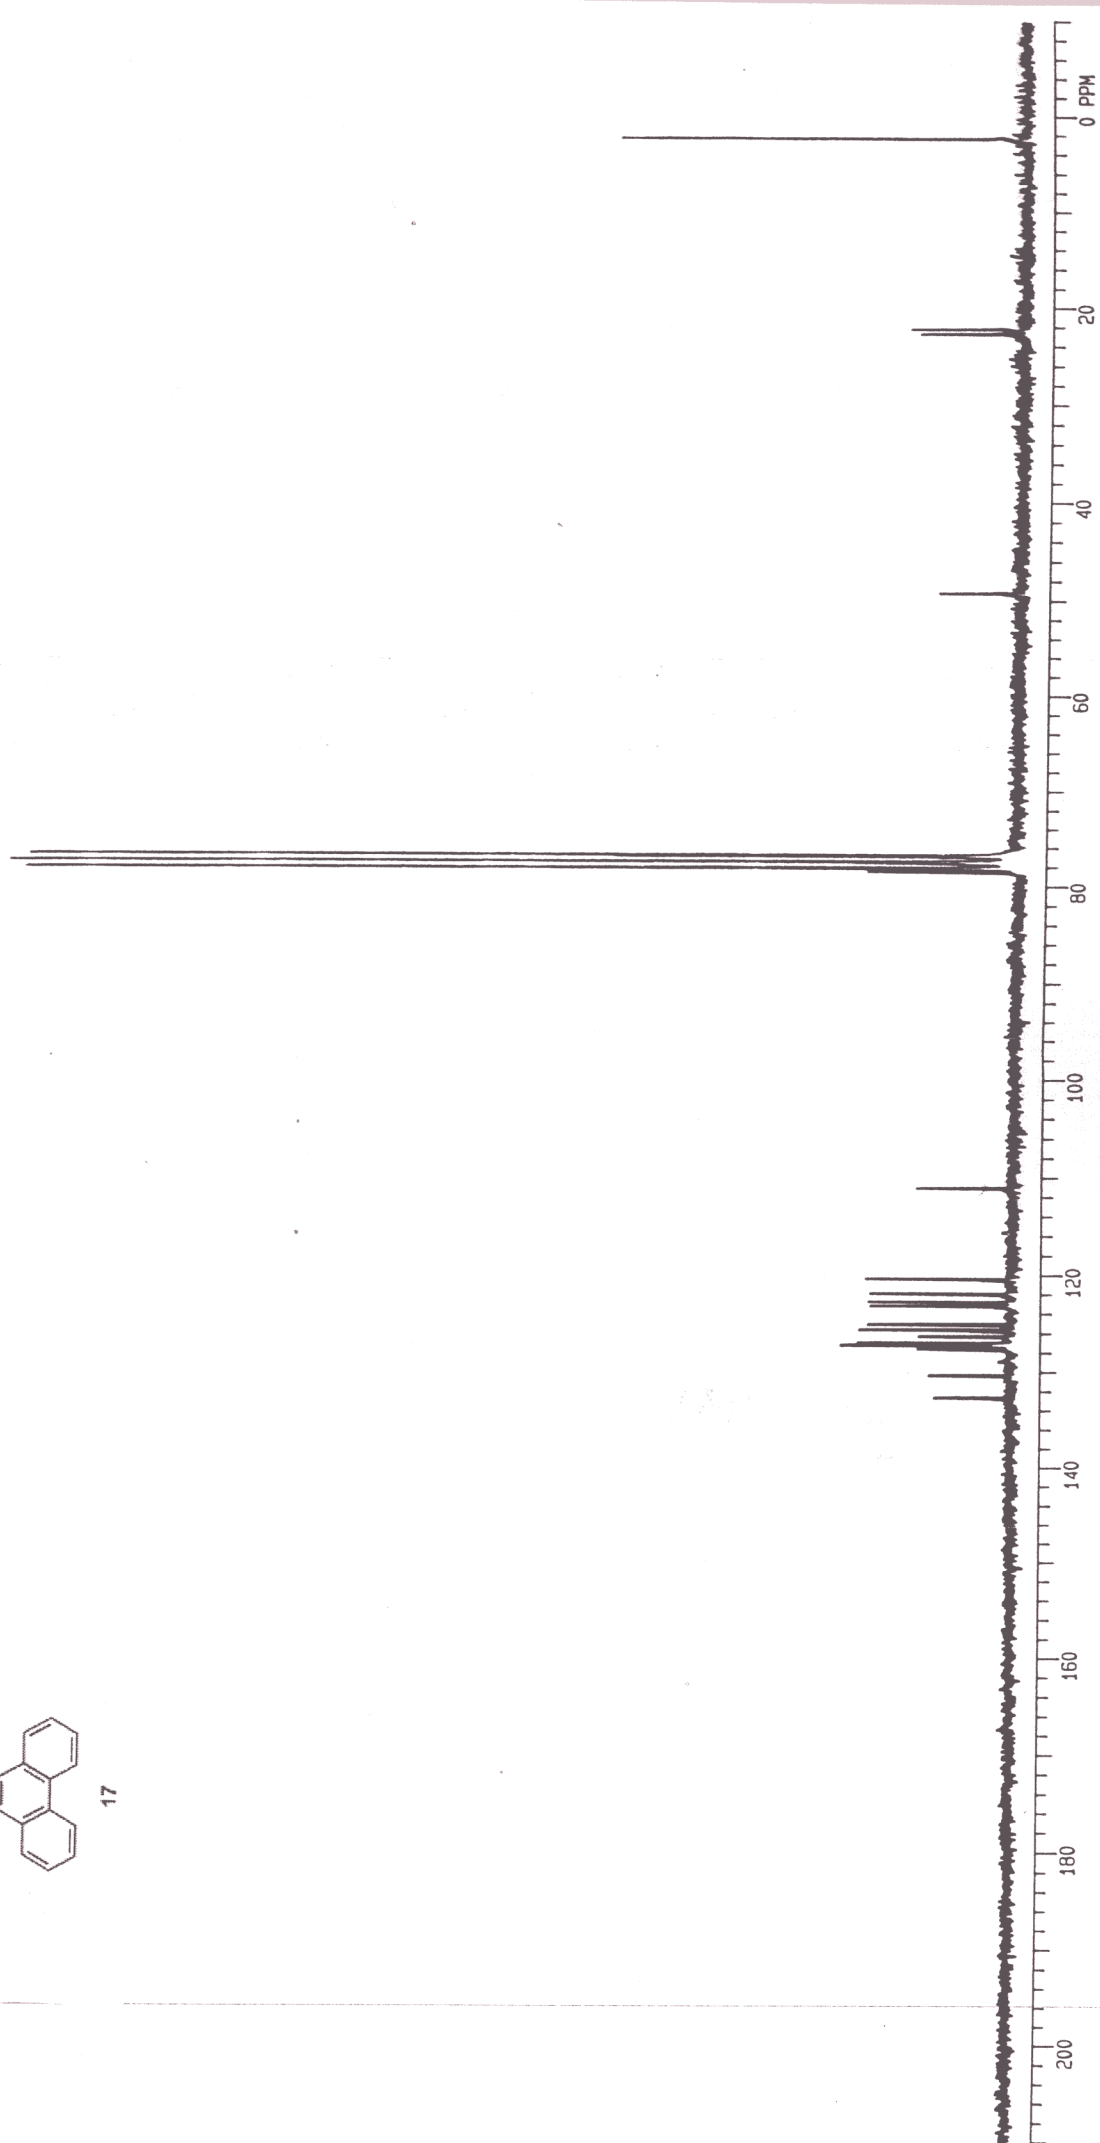

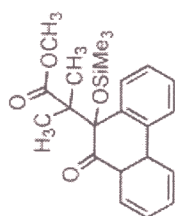

18

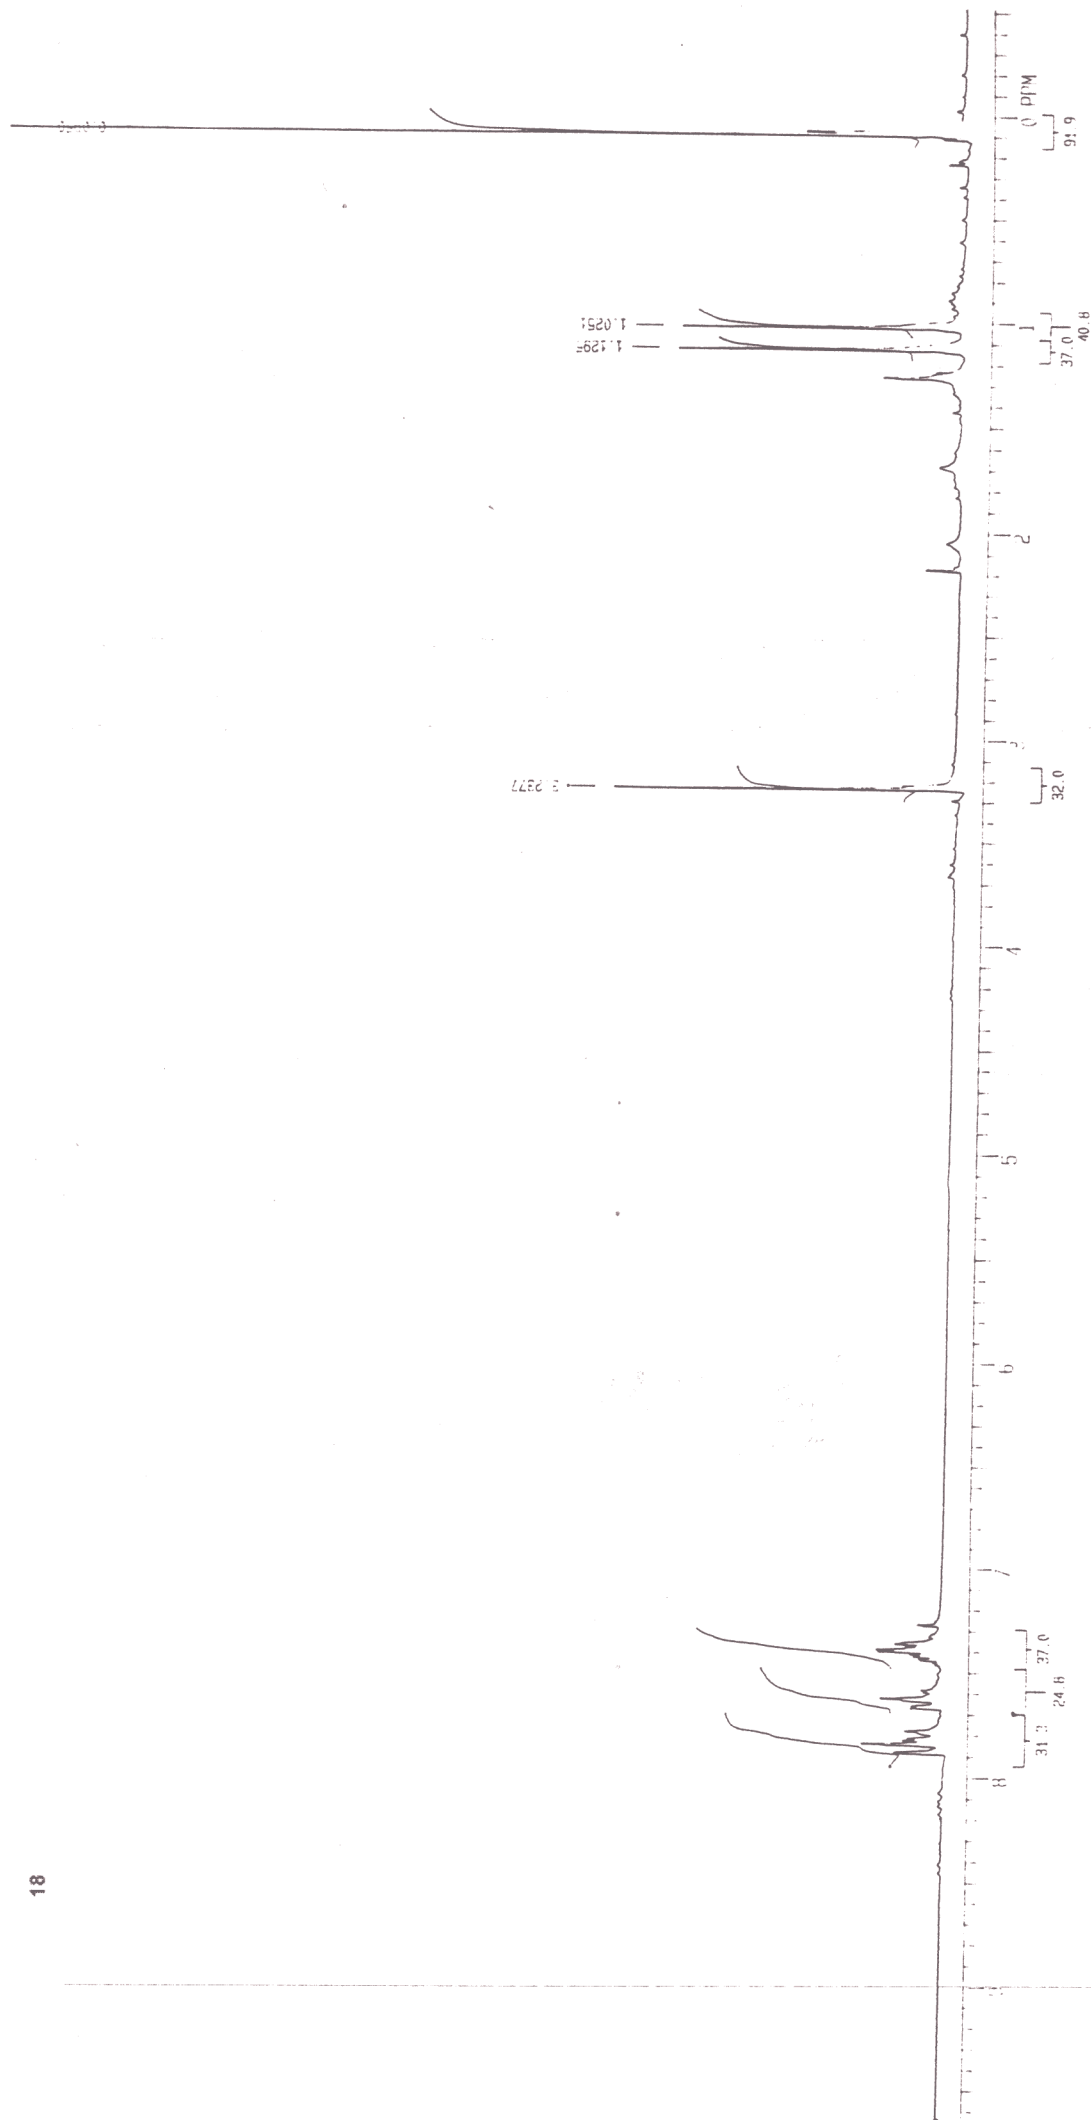

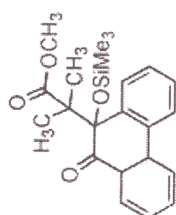

18

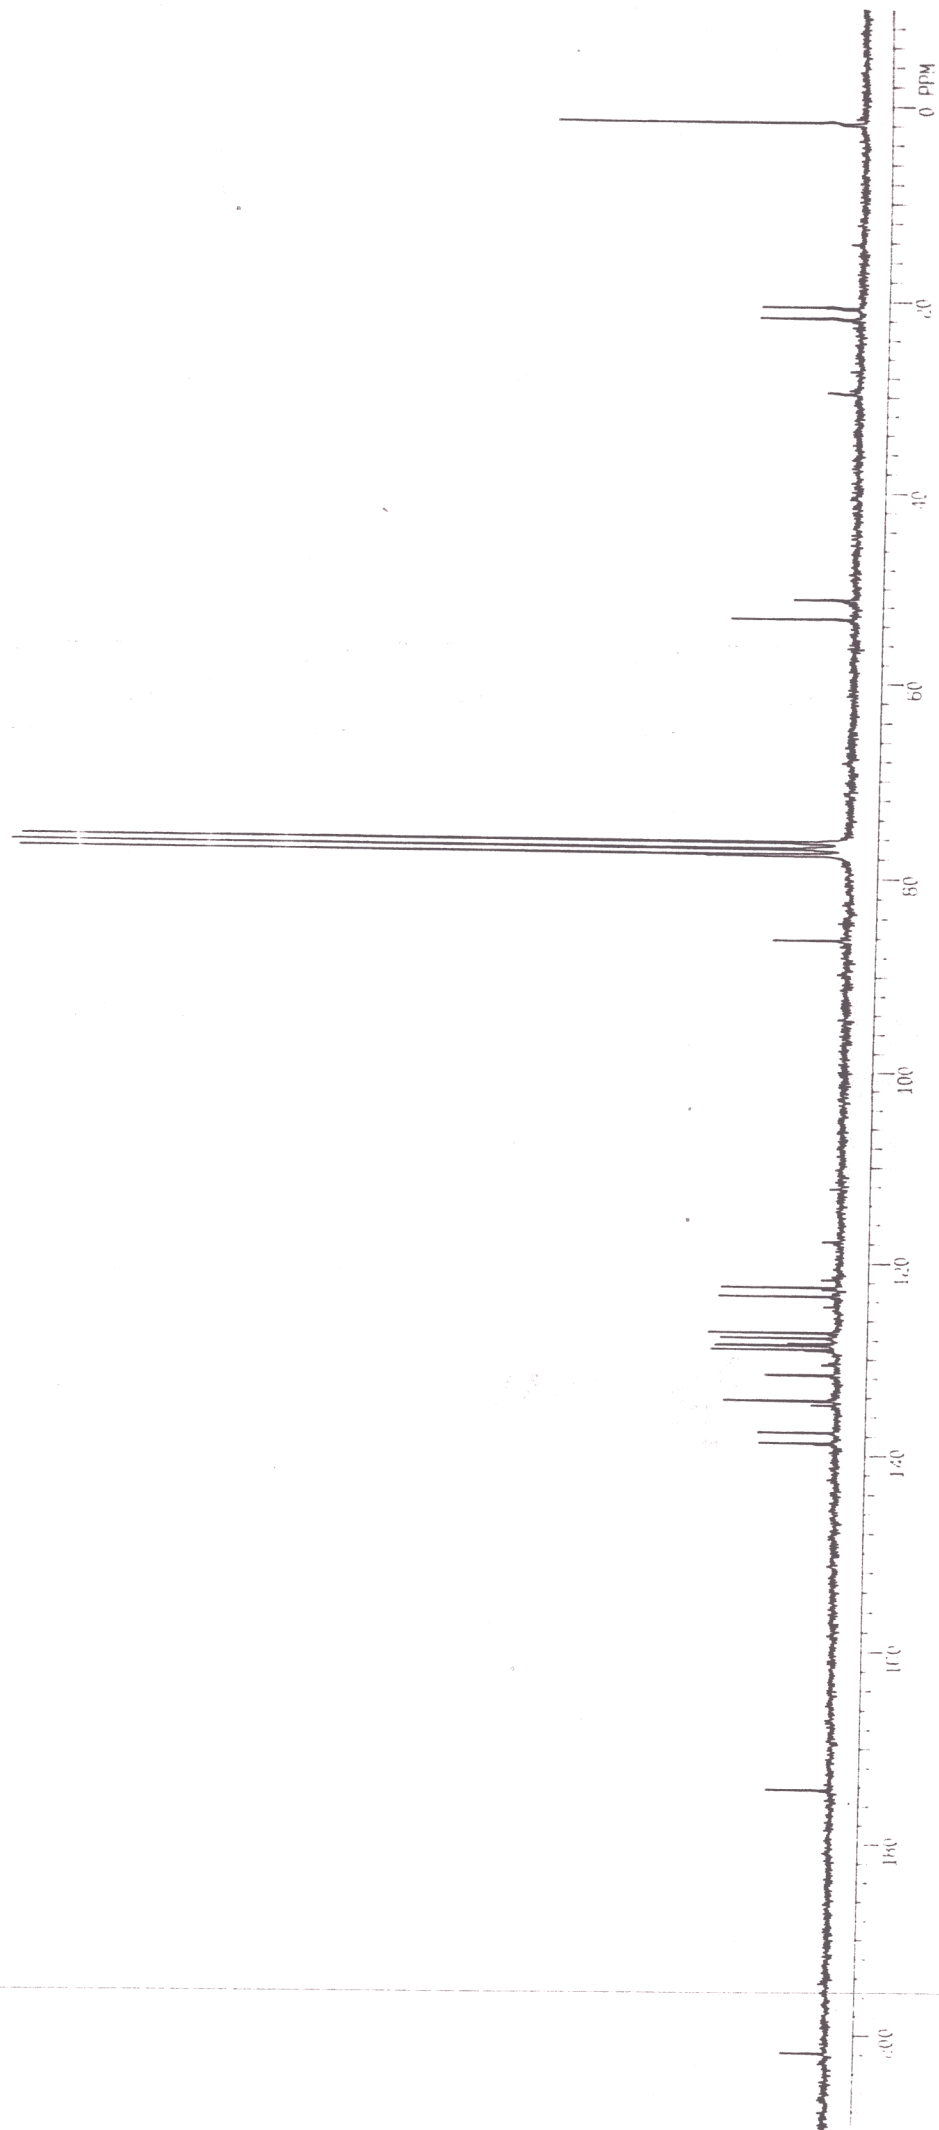

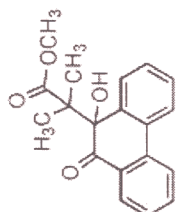

19

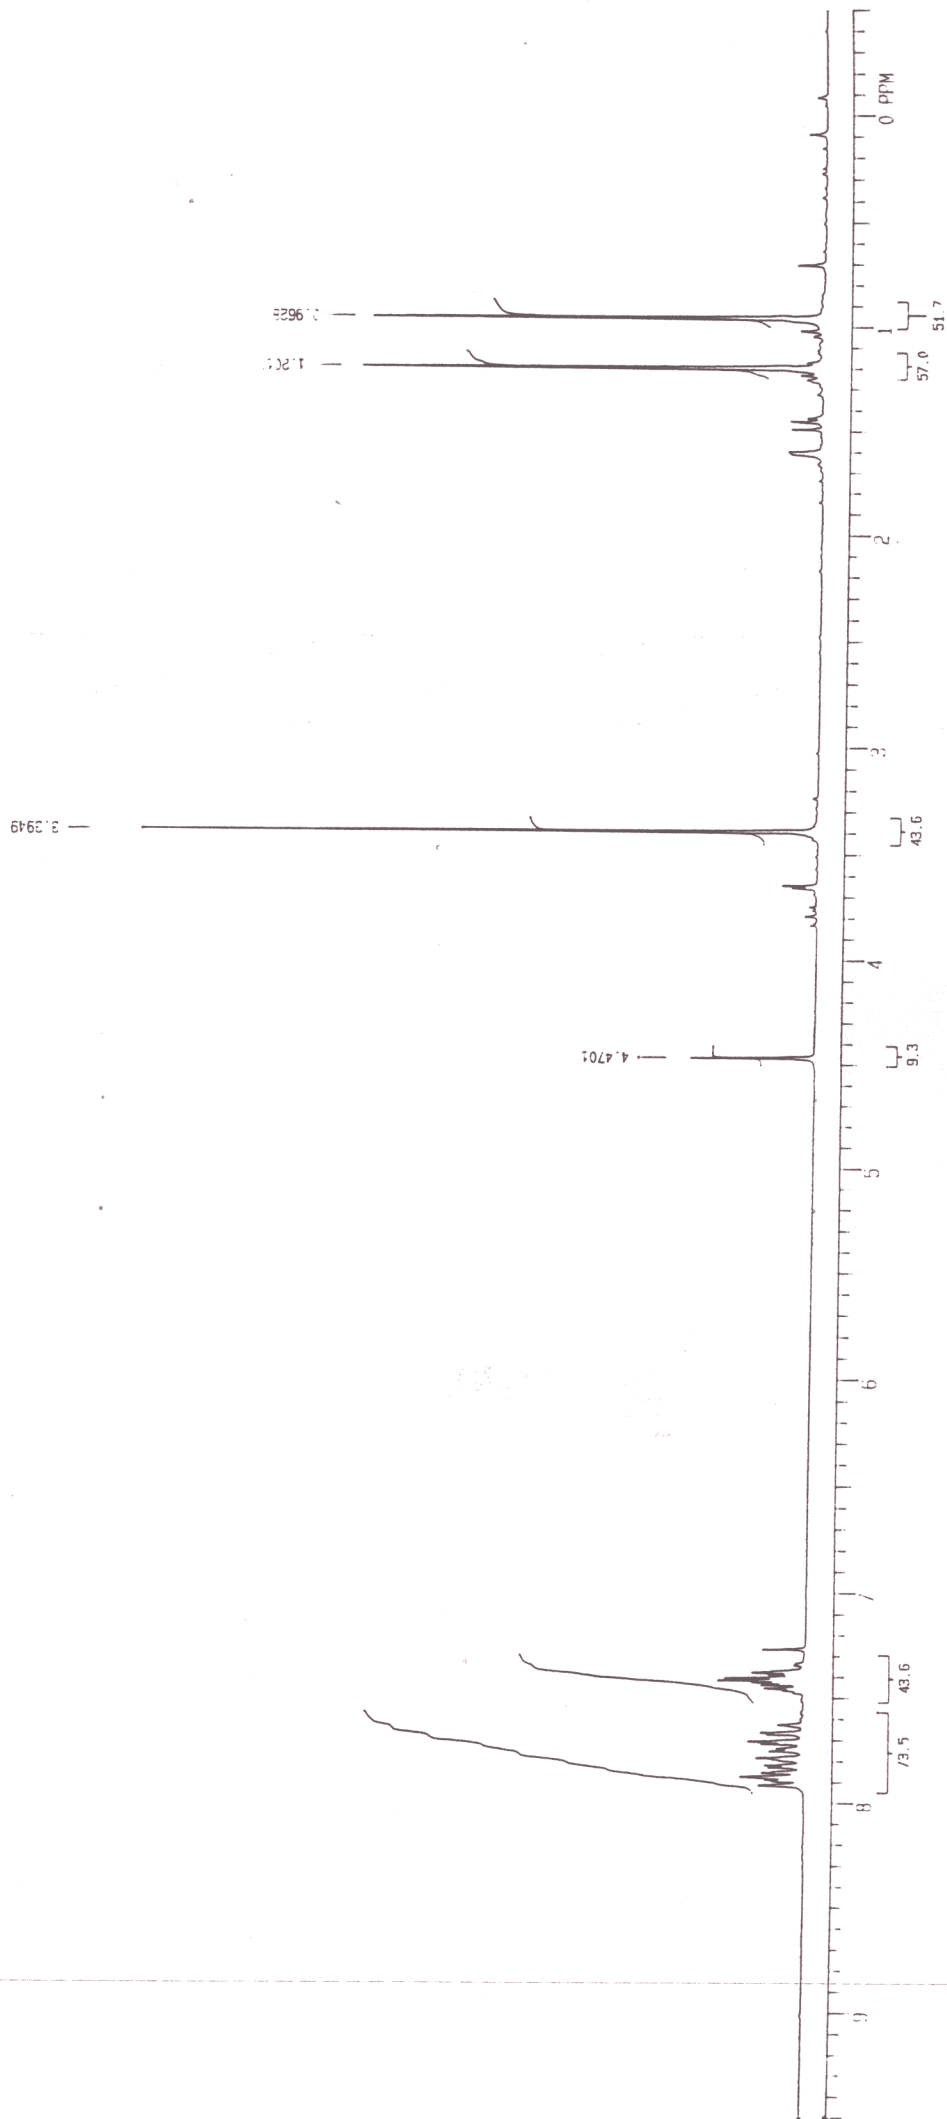

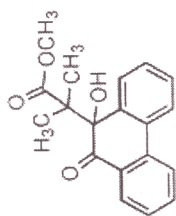

19

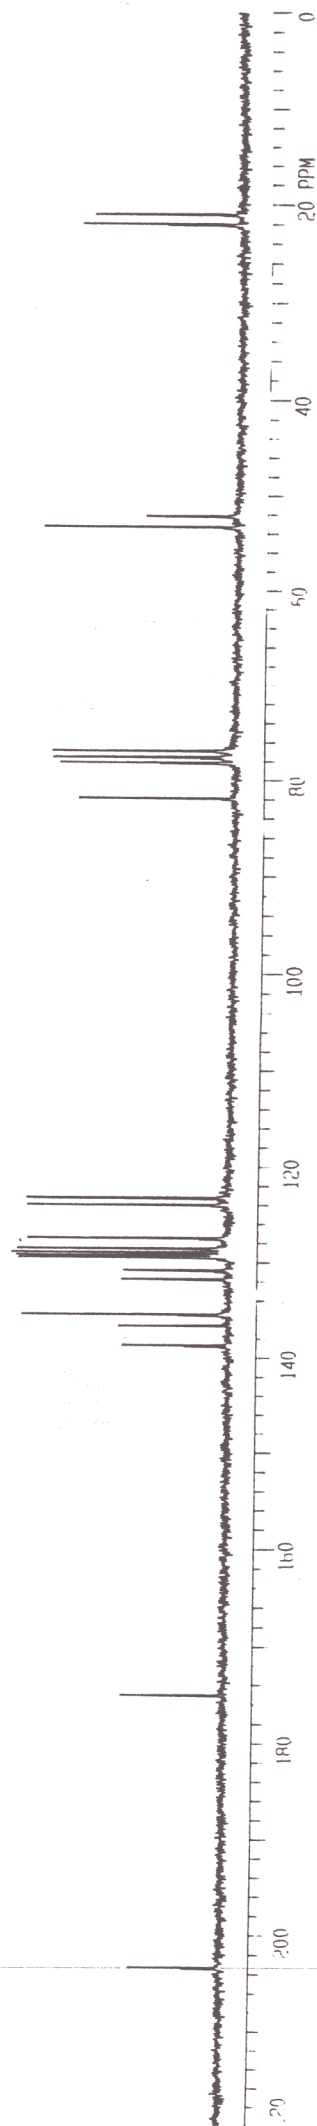

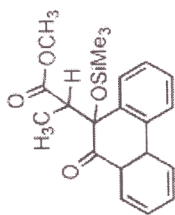

20 a

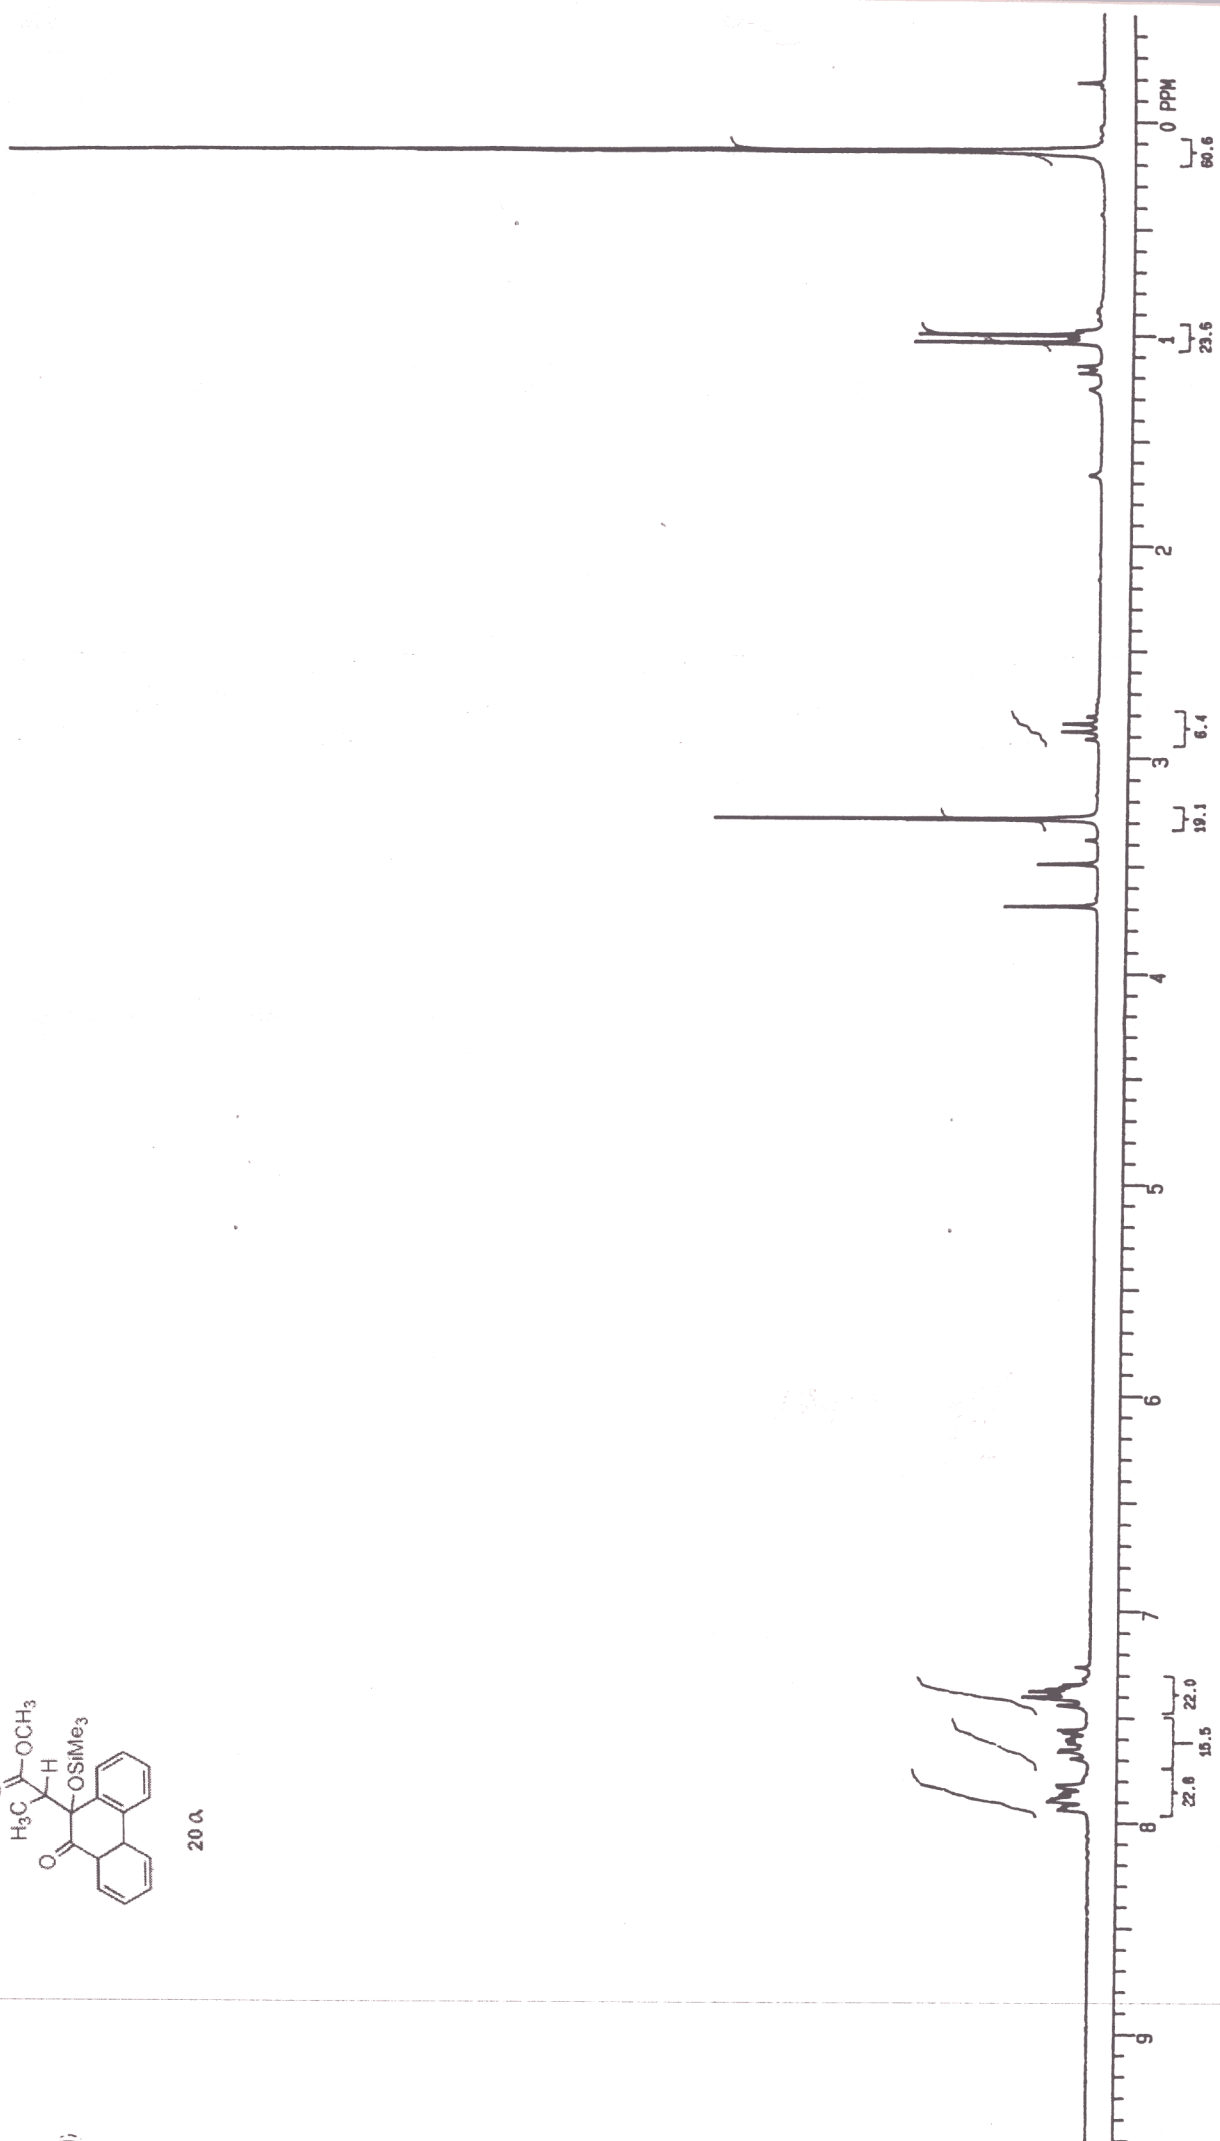

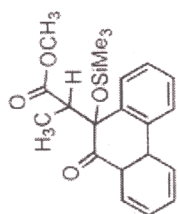

20 a

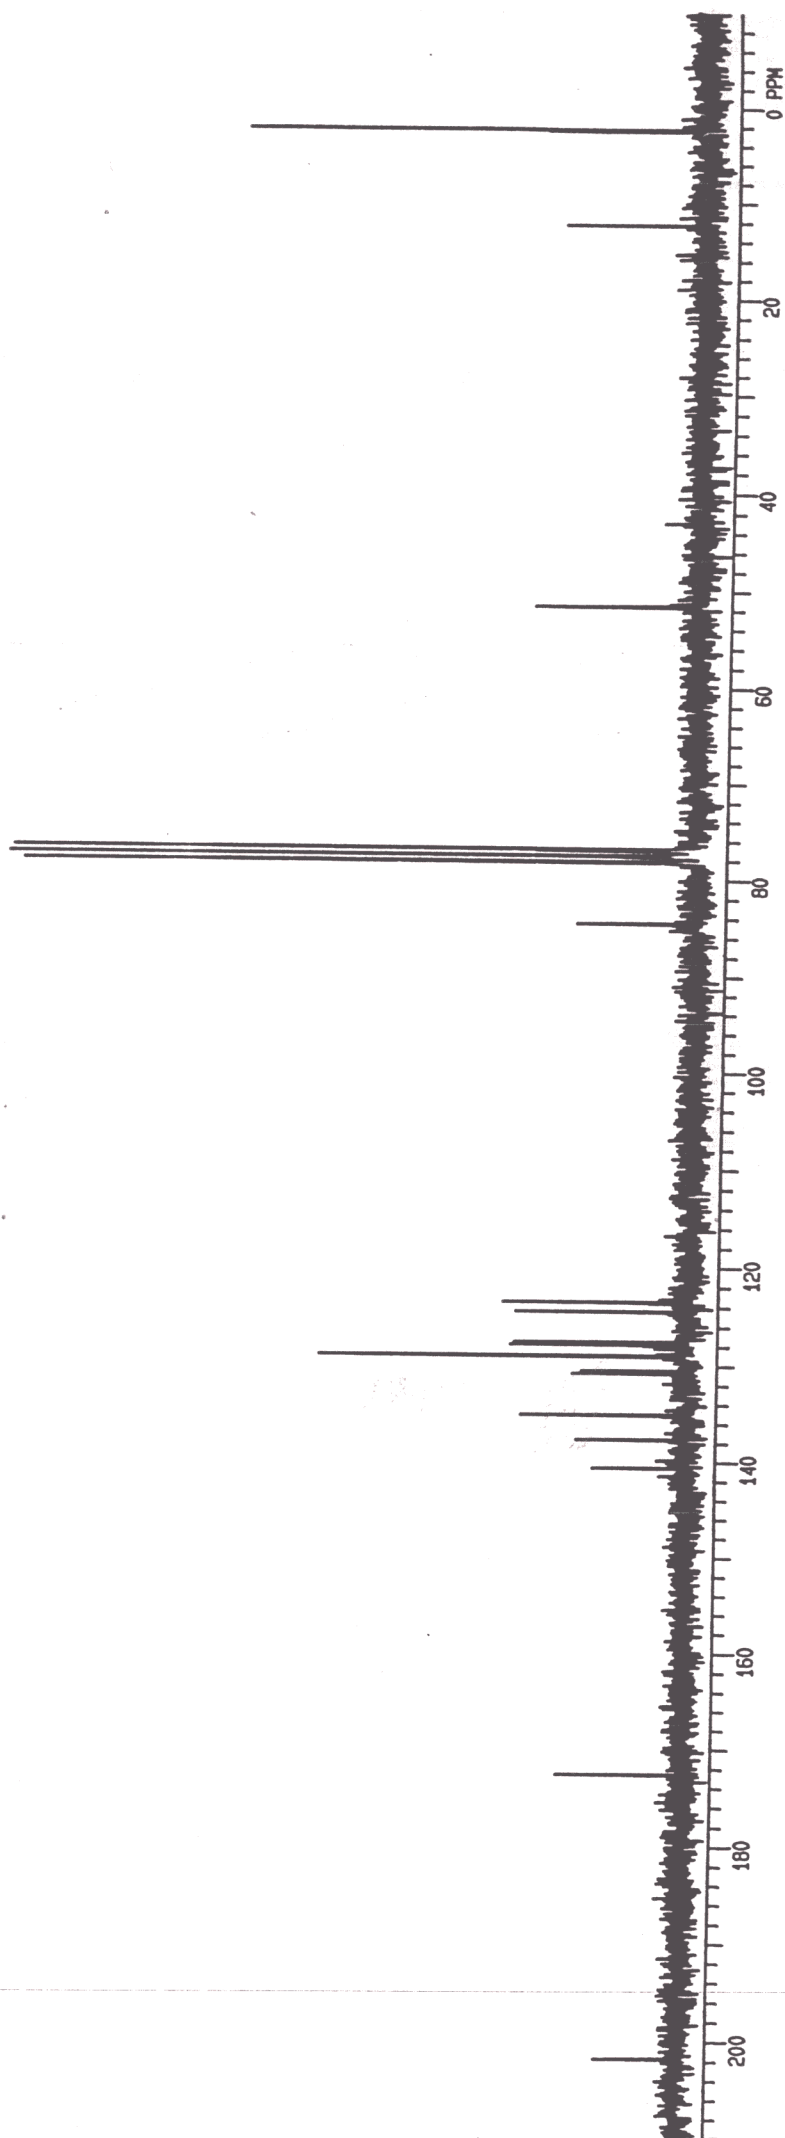

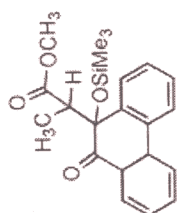

402

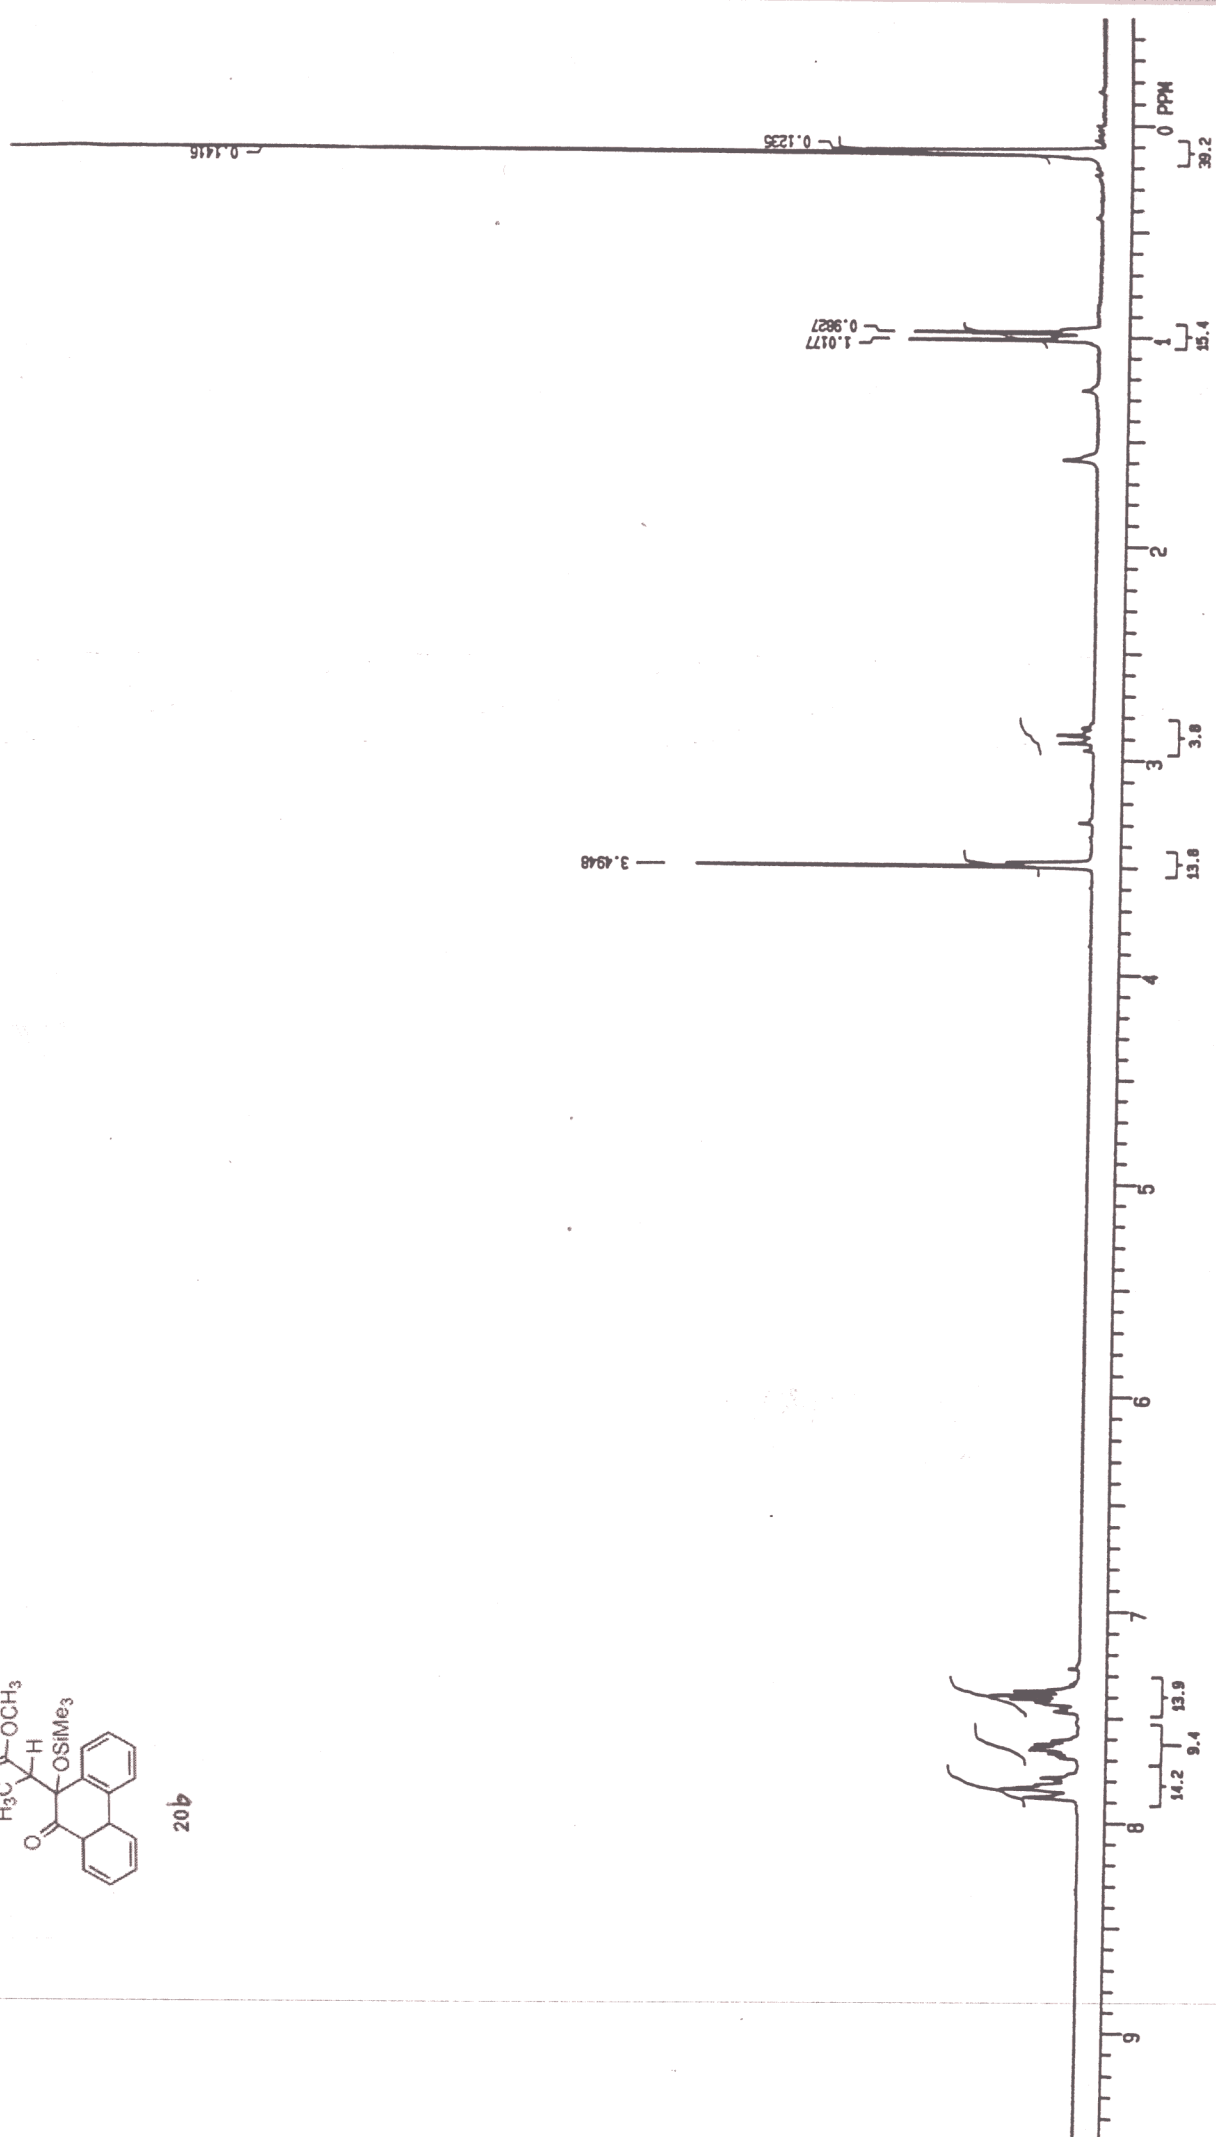



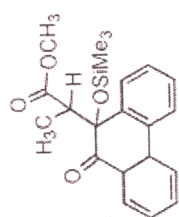

20b

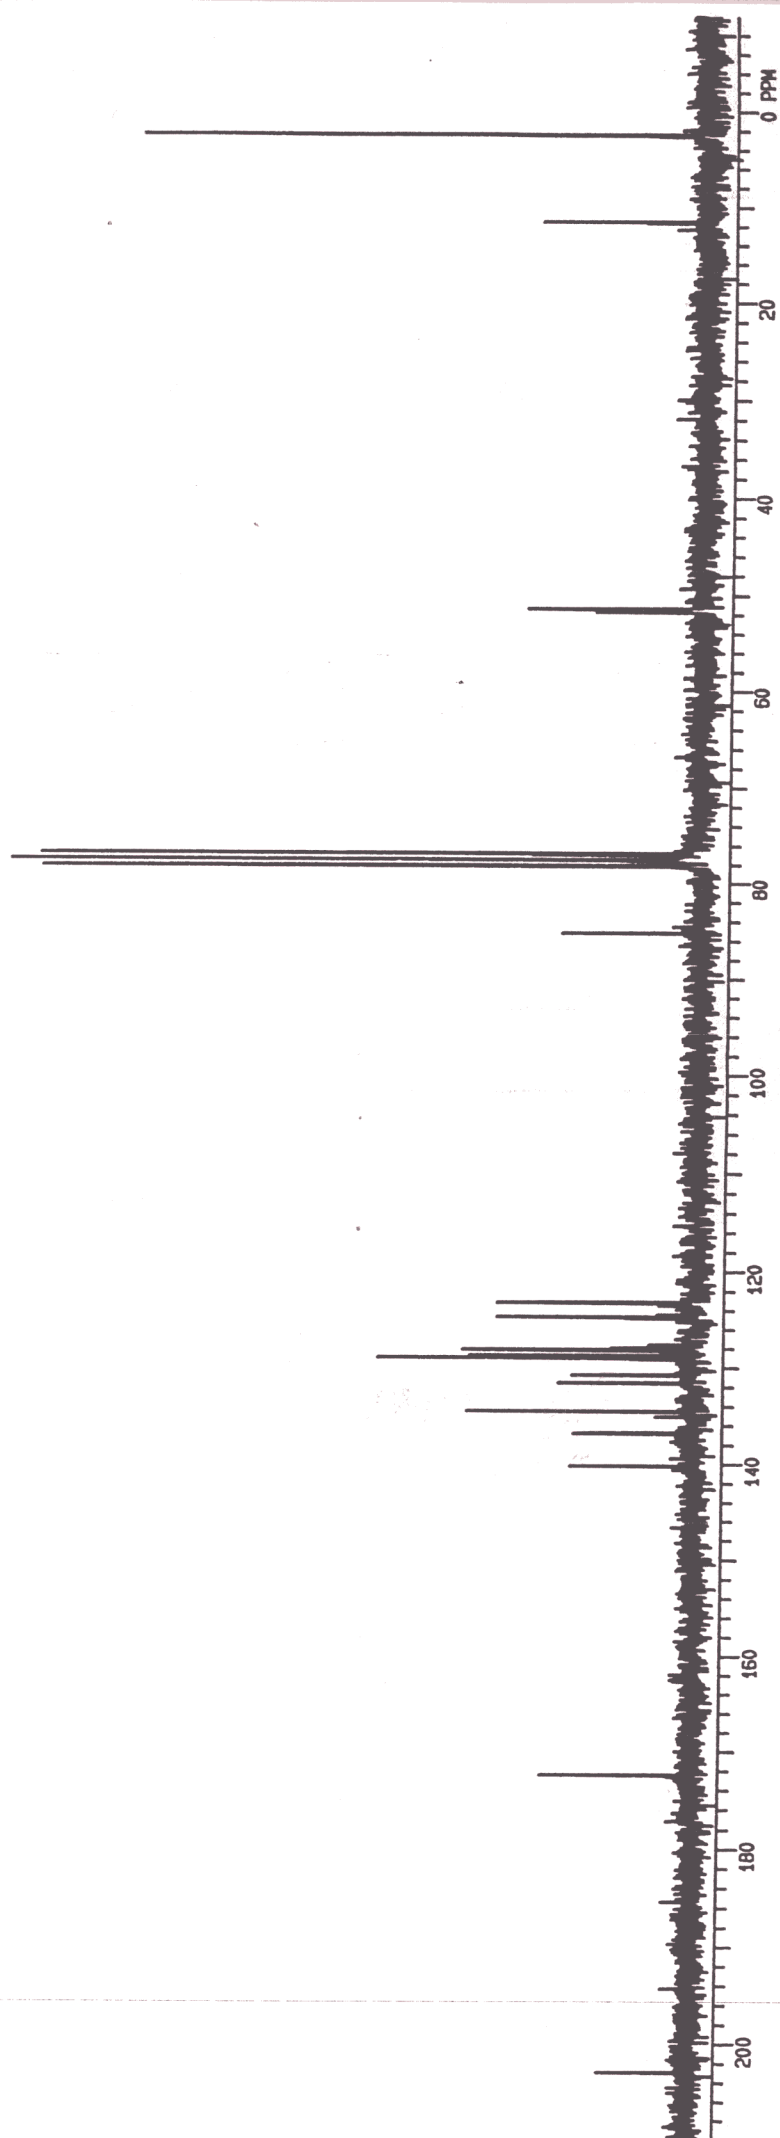

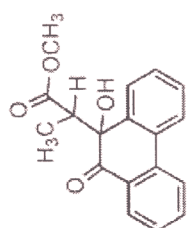

210

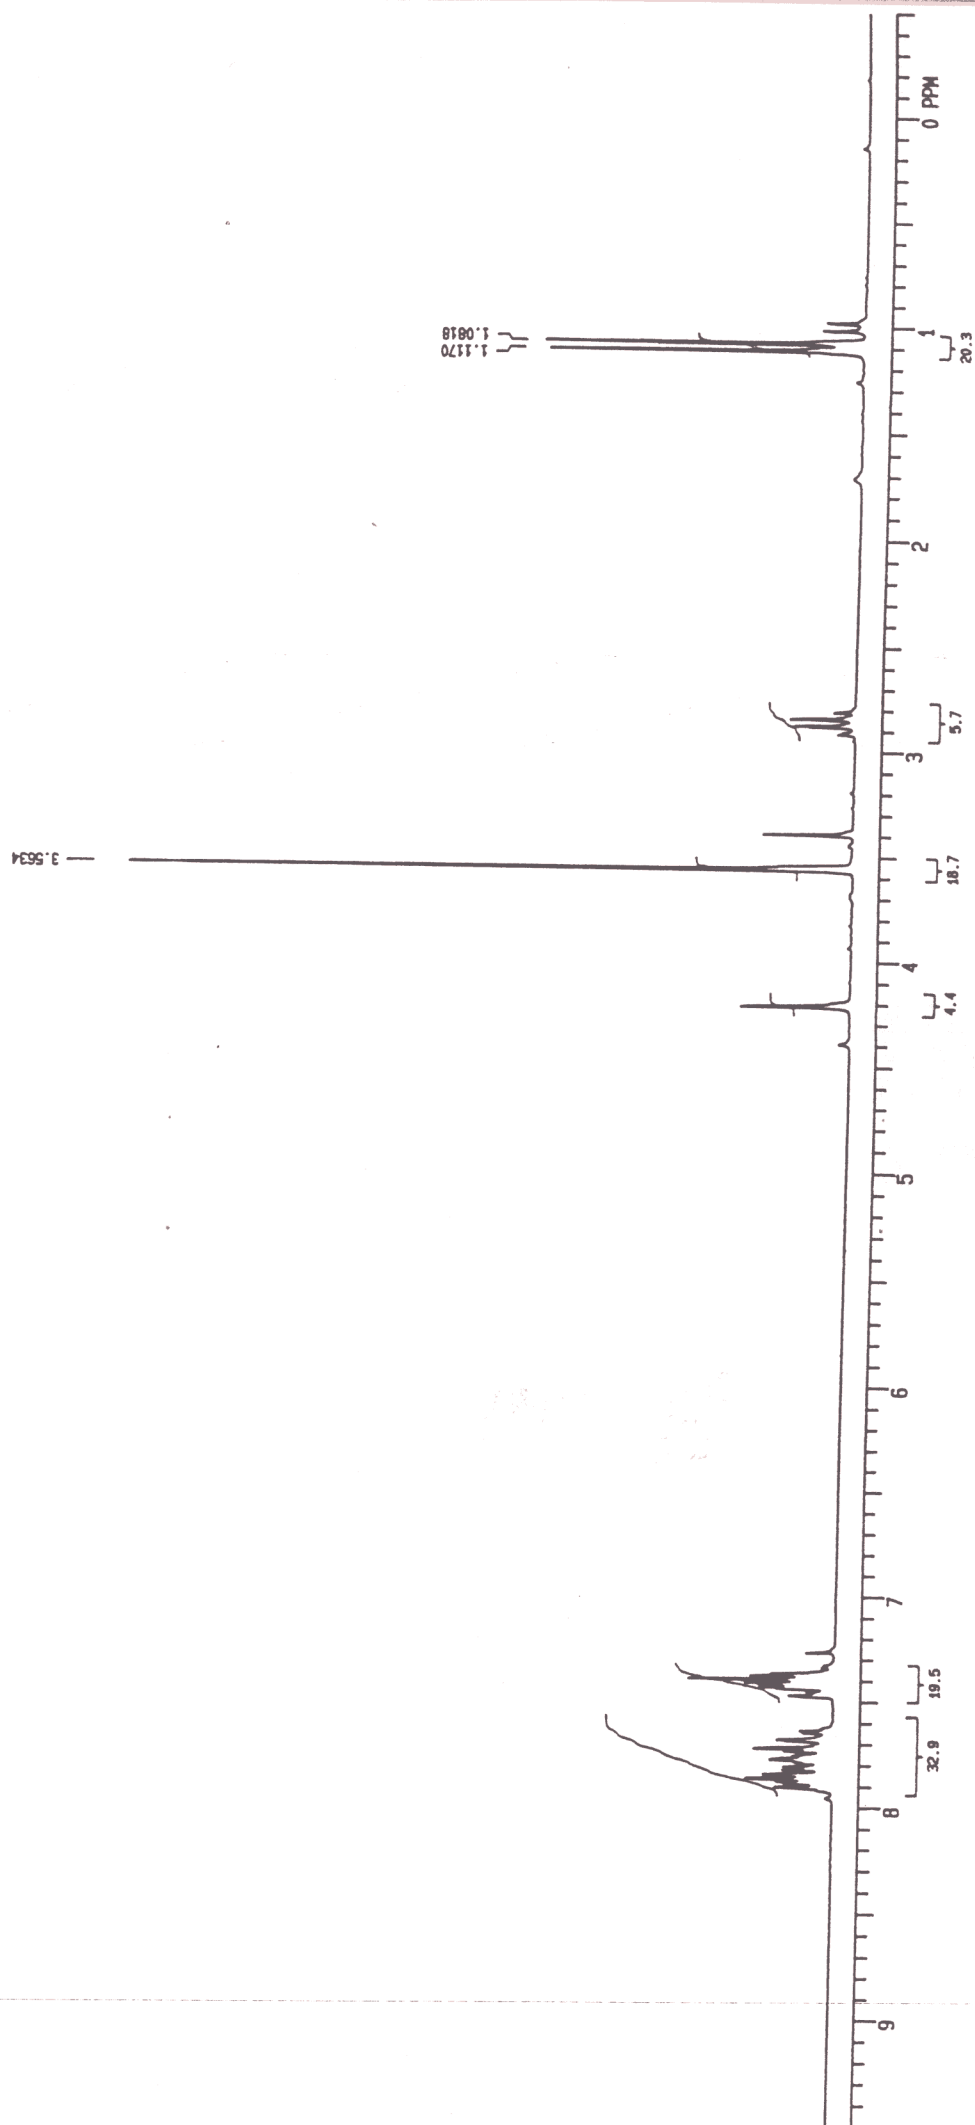

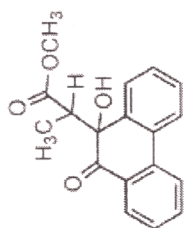

21a

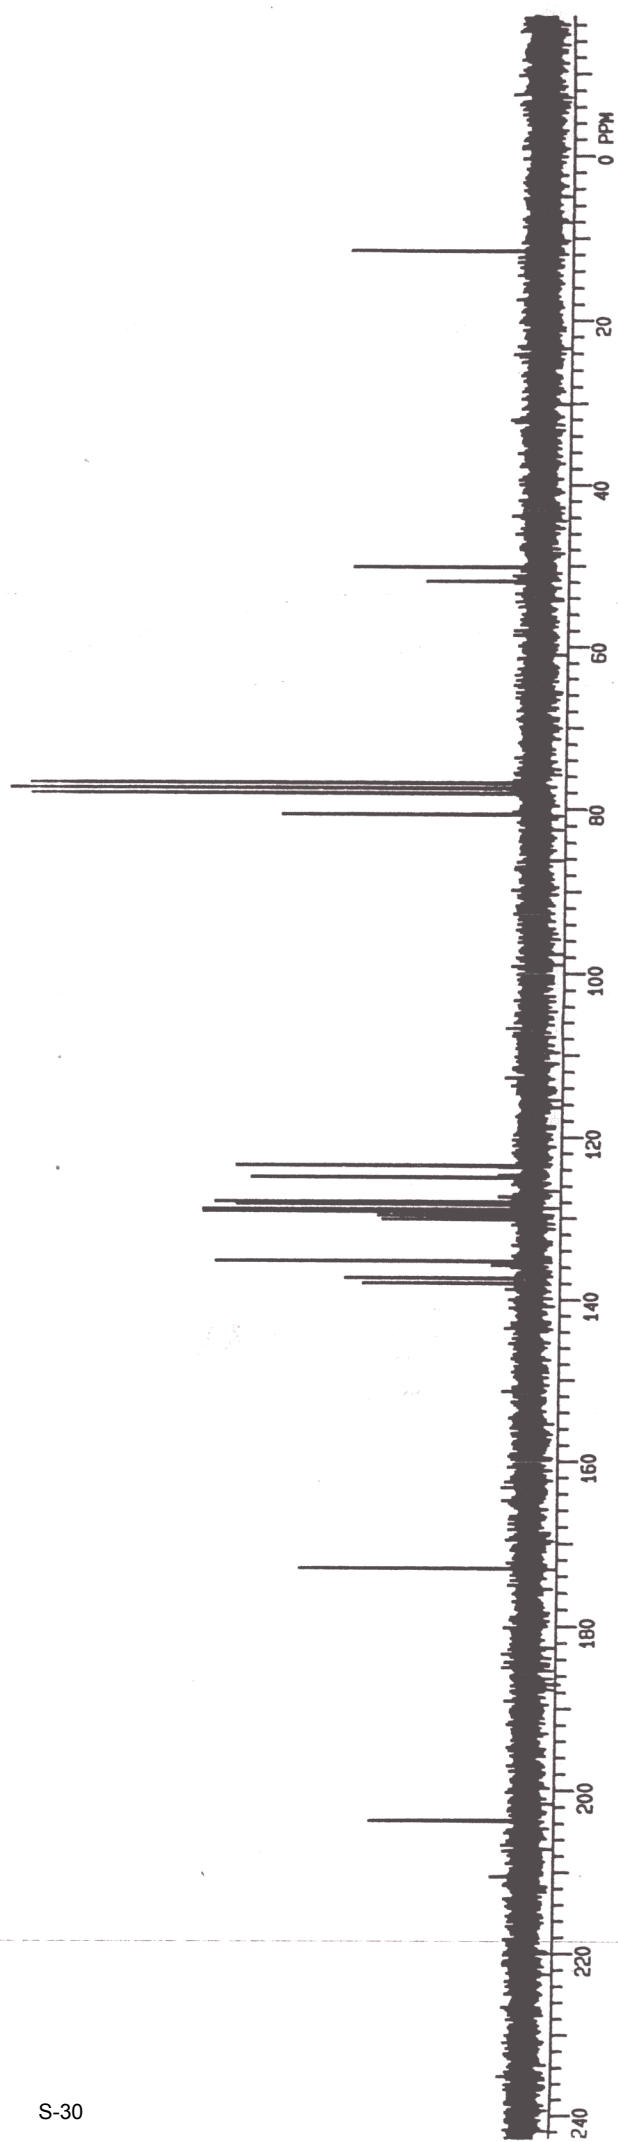

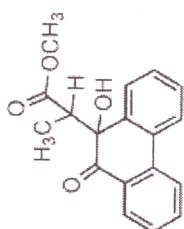

21b

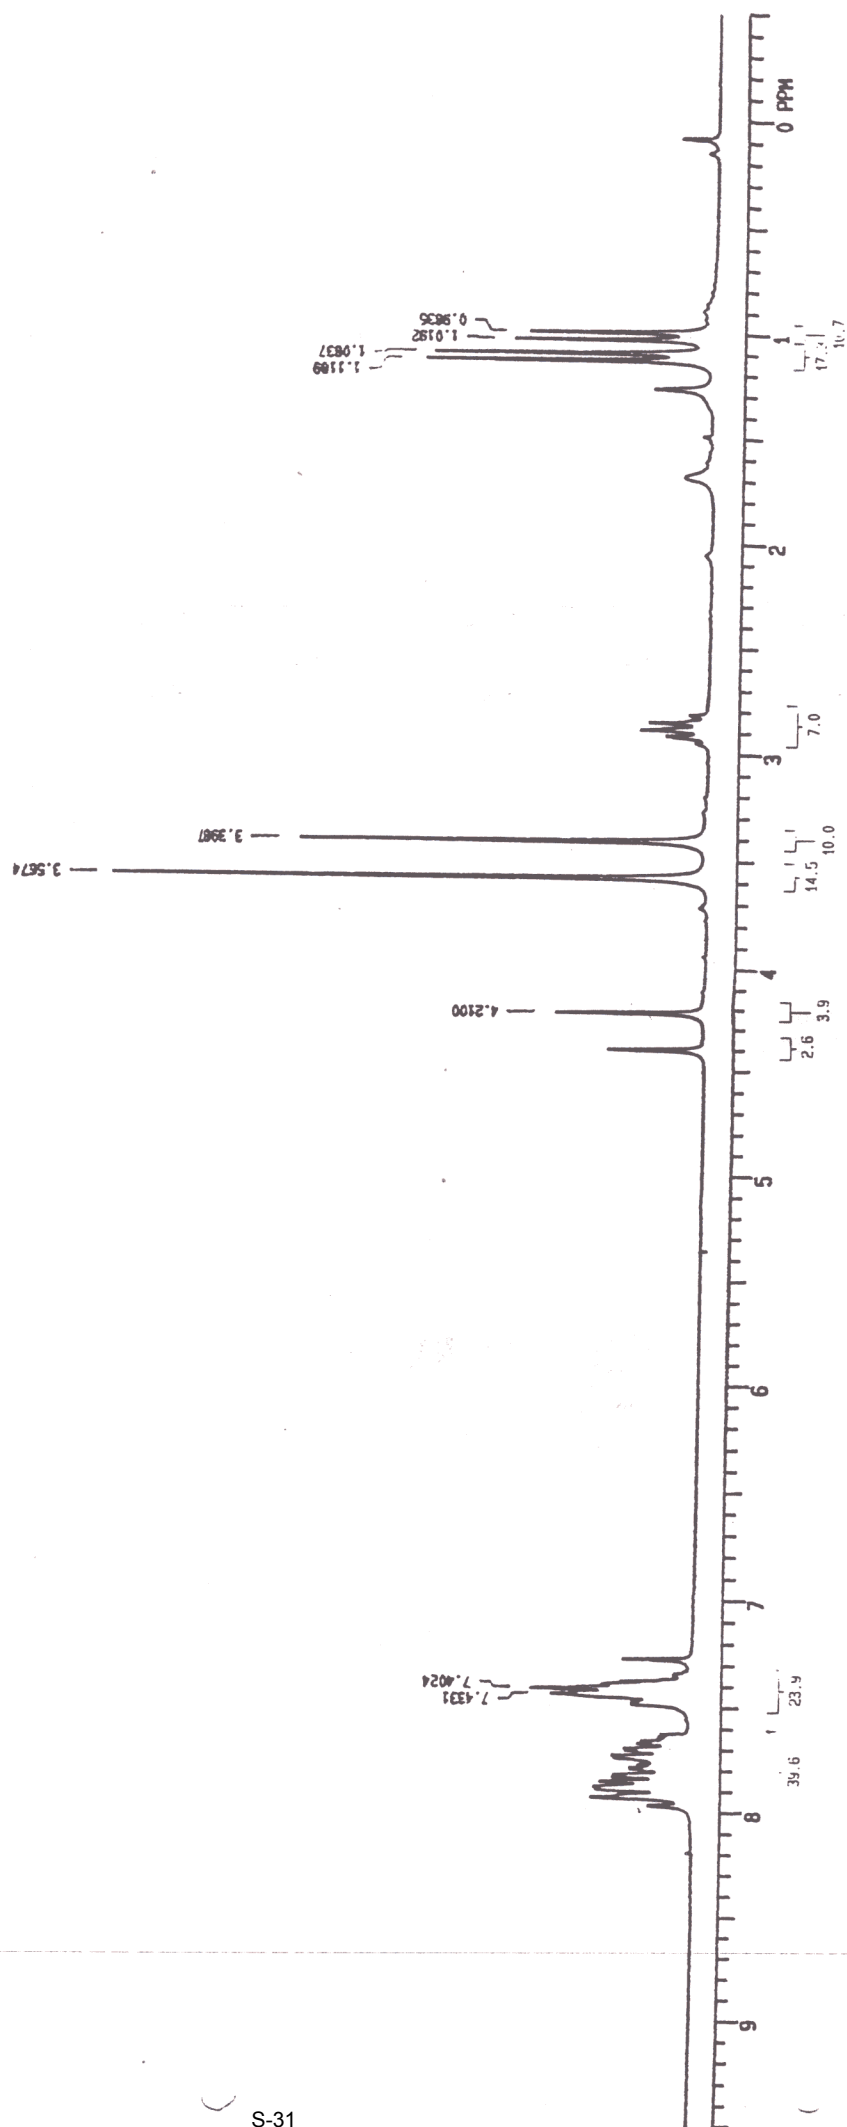

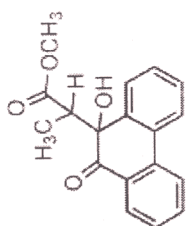

412

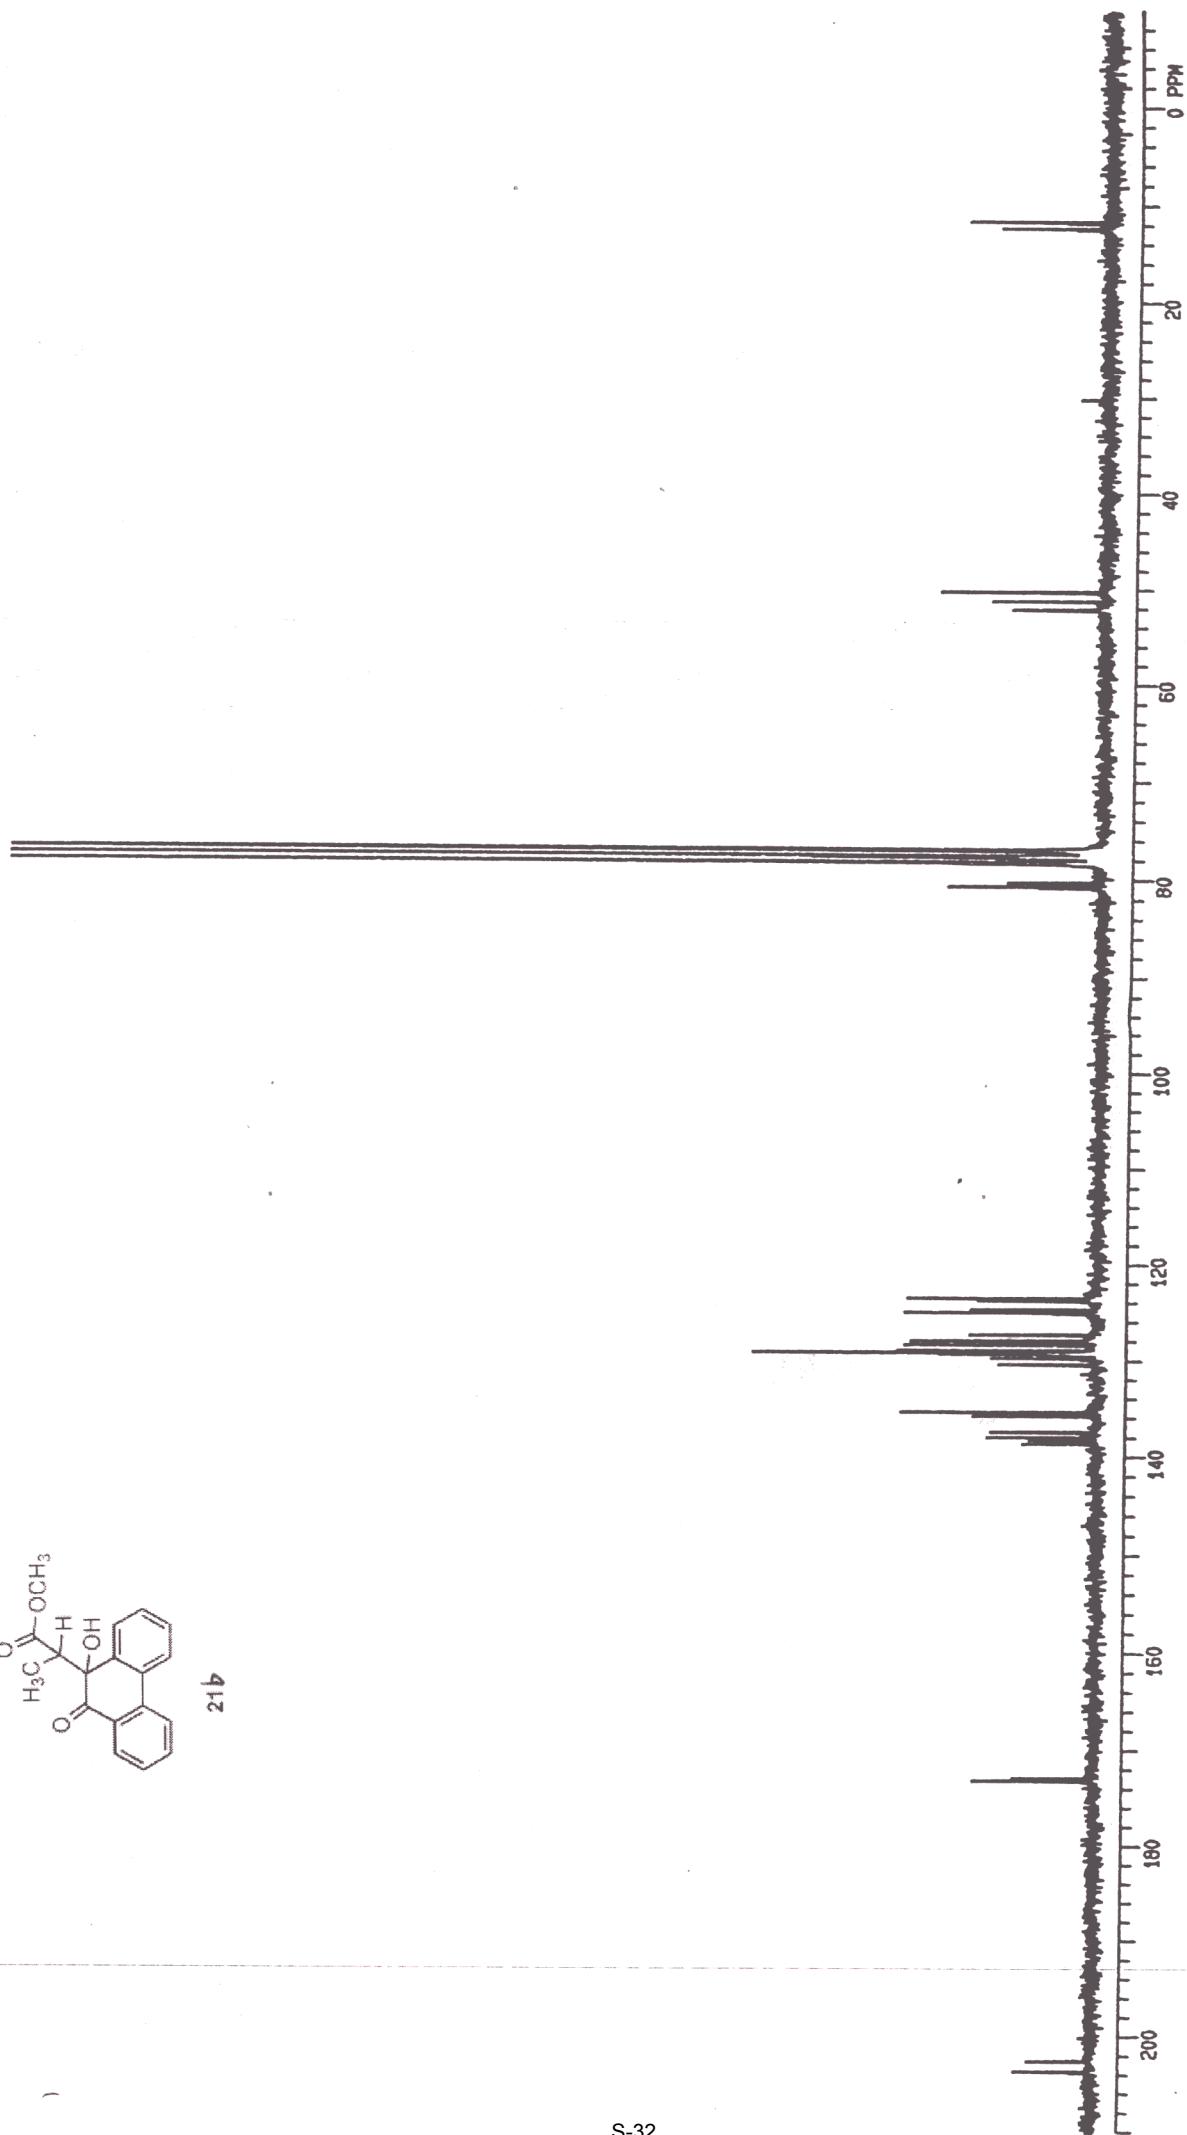

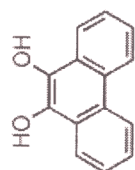

22

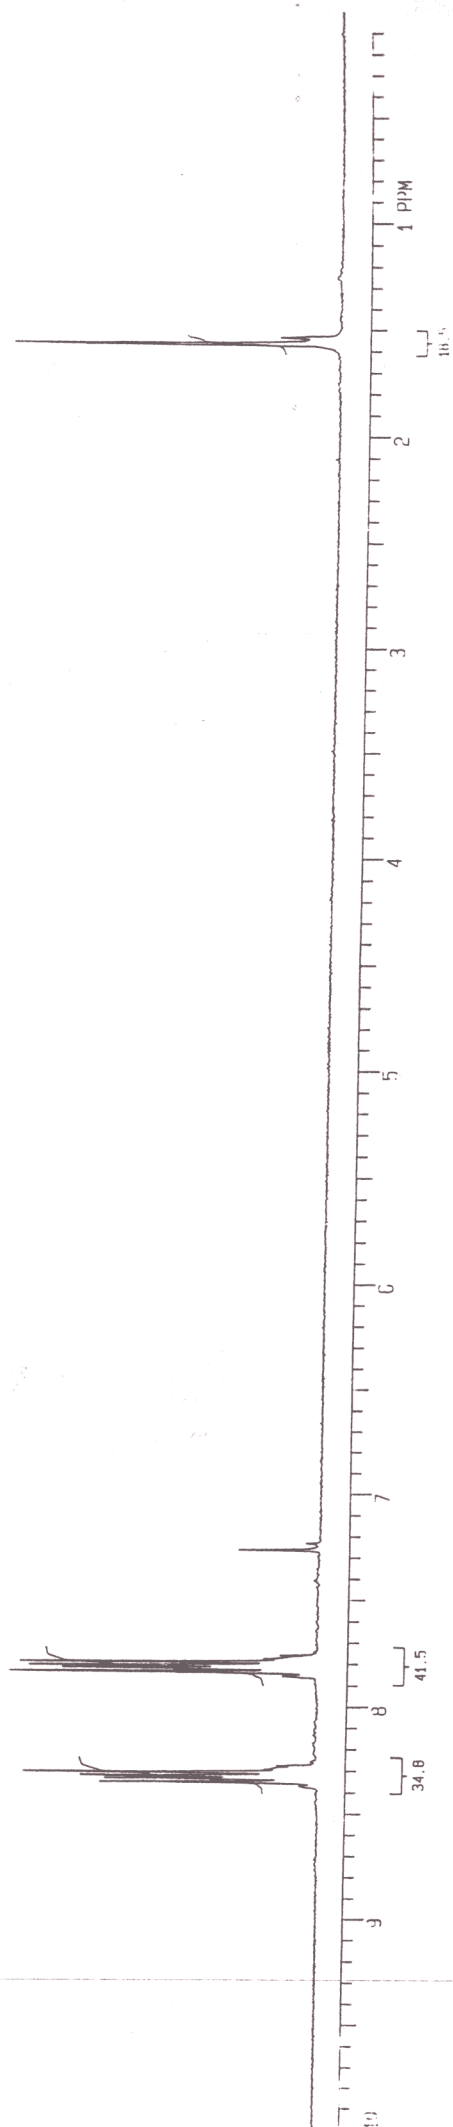

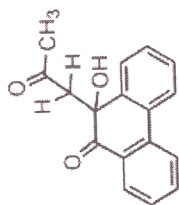

23

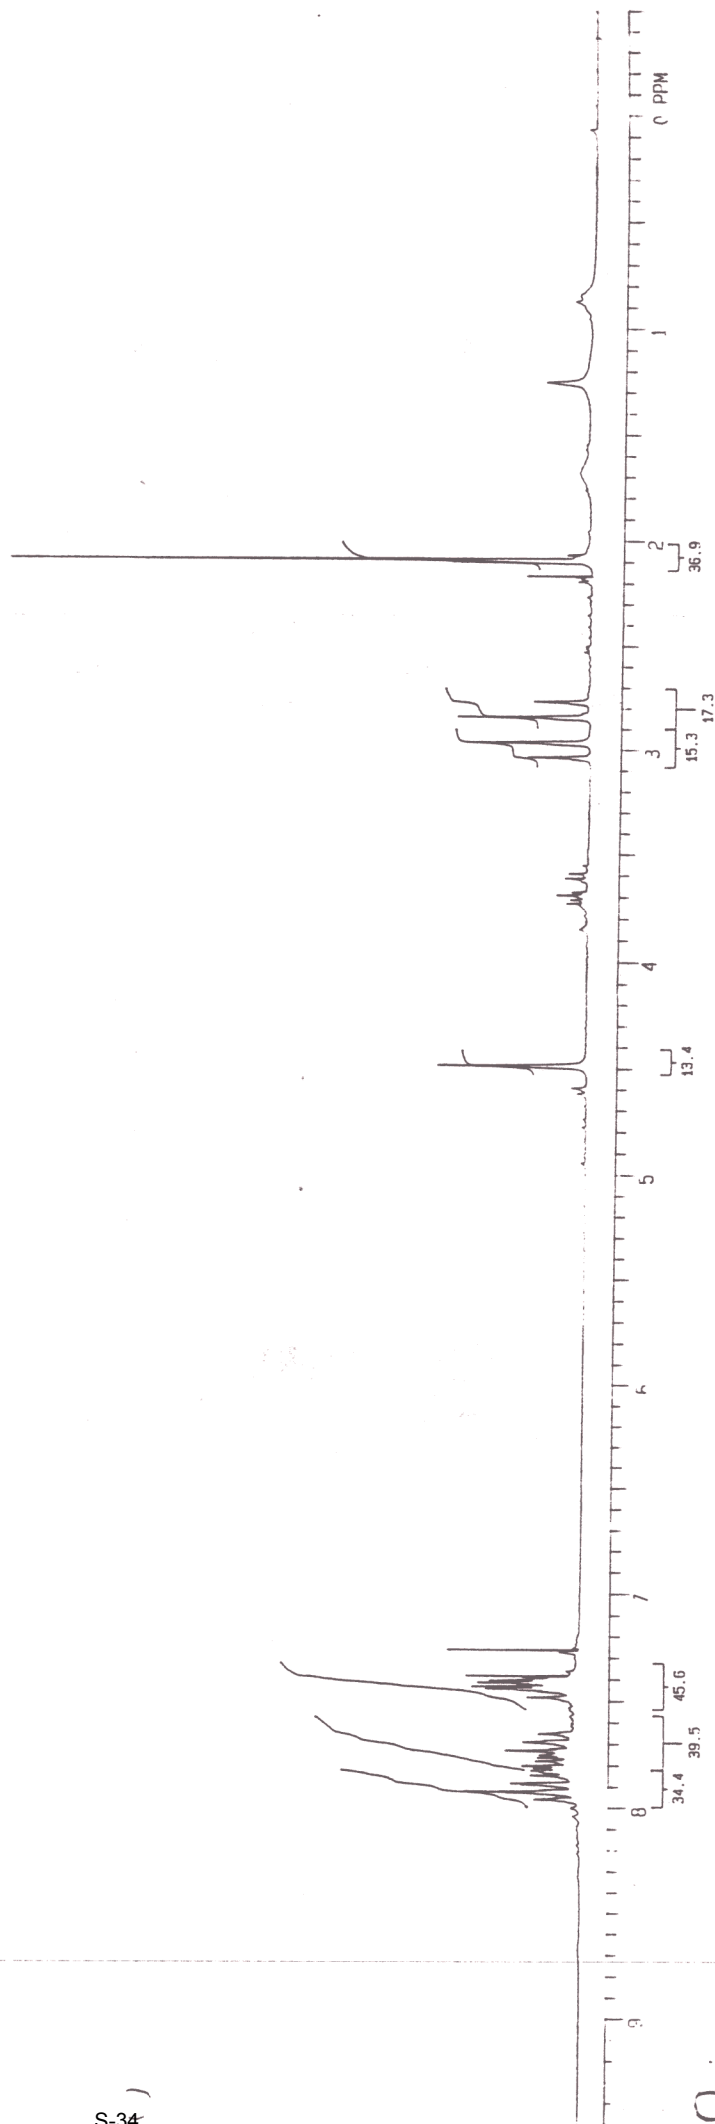

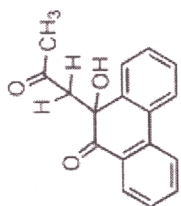

23

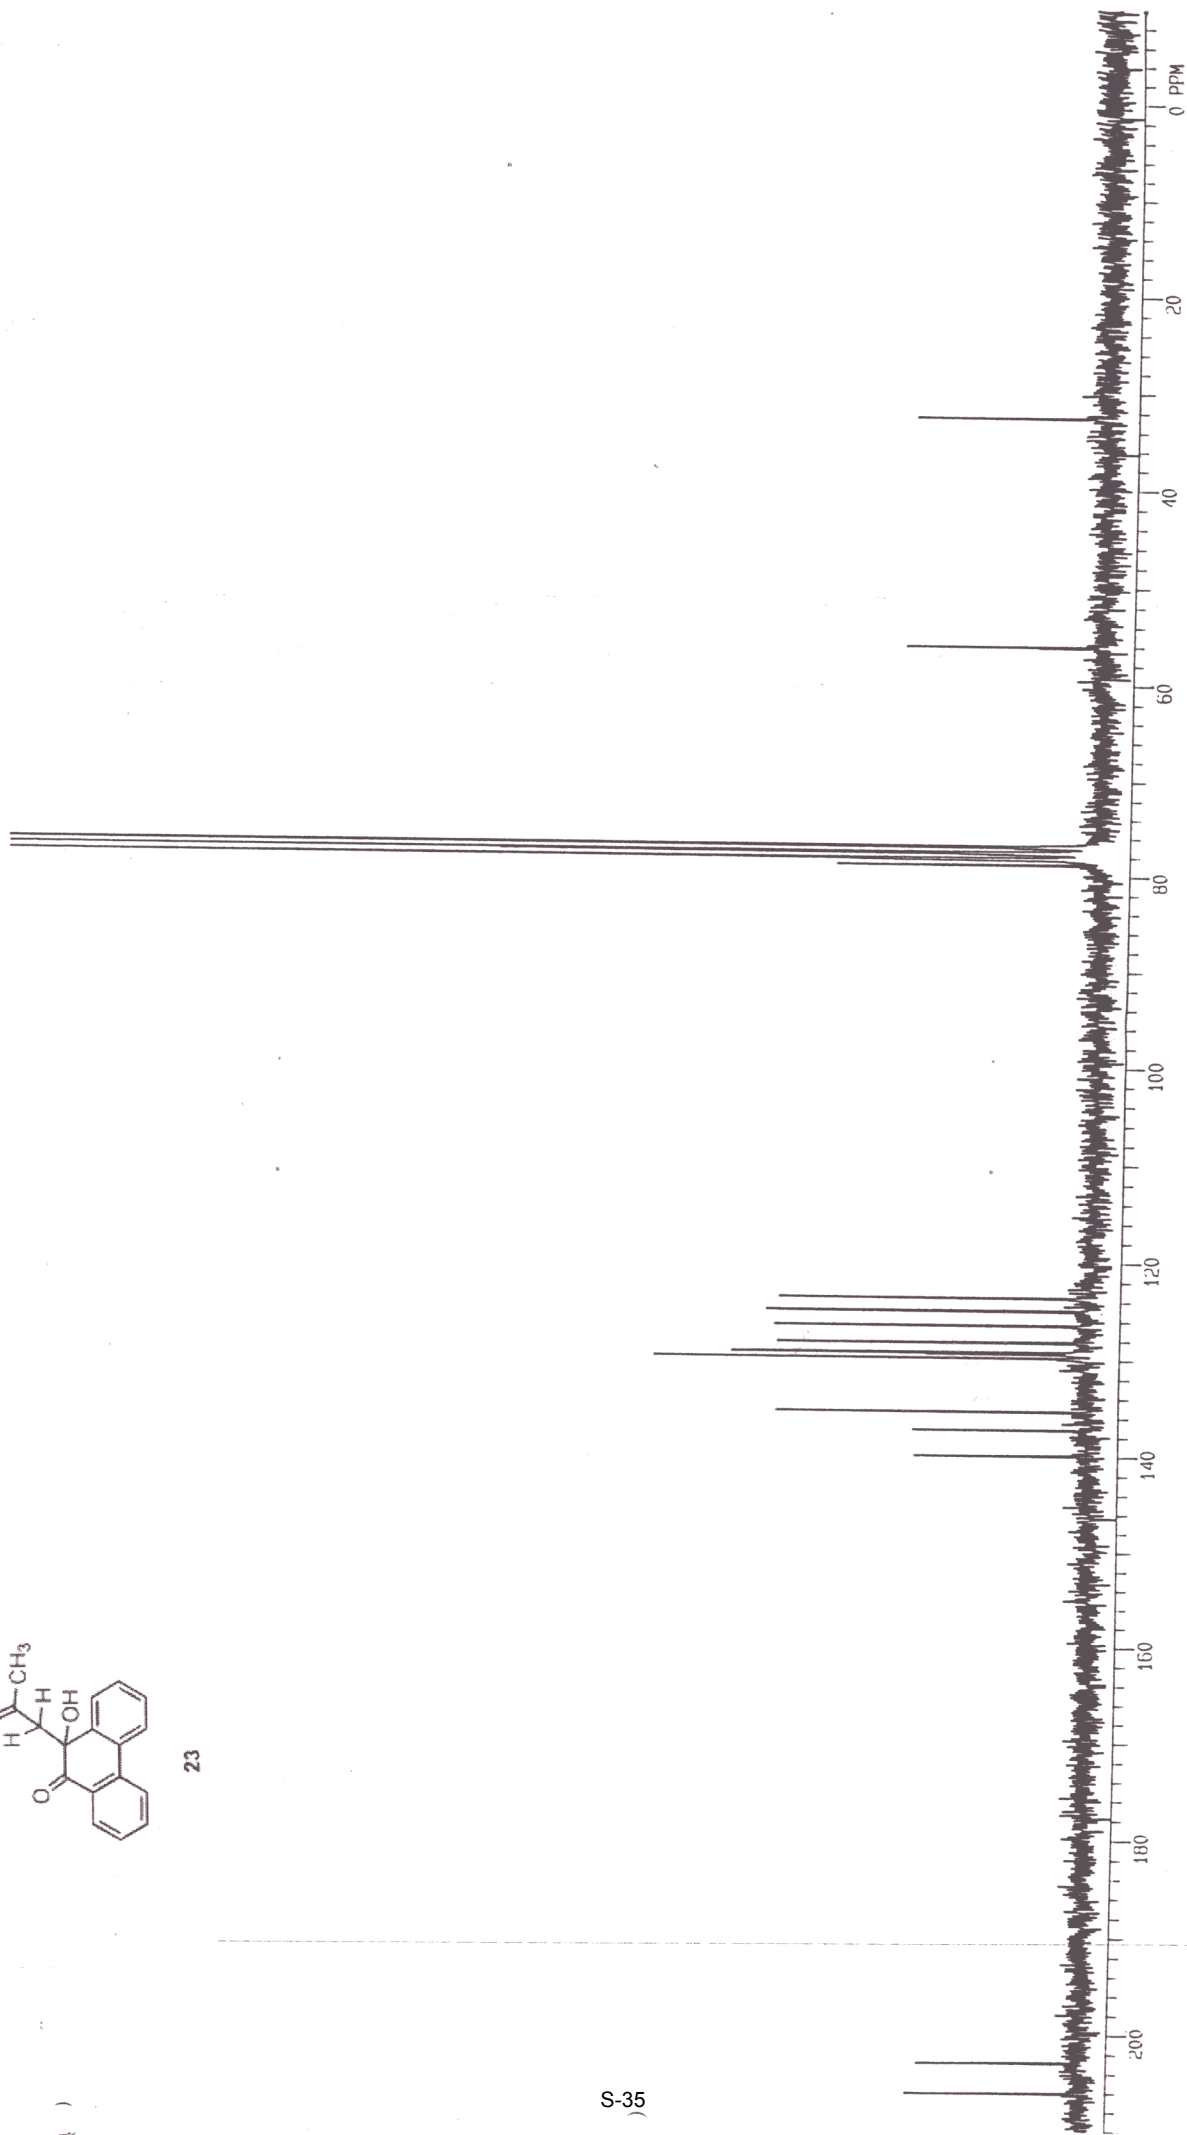



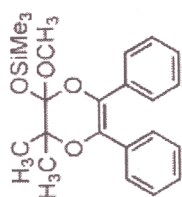

24

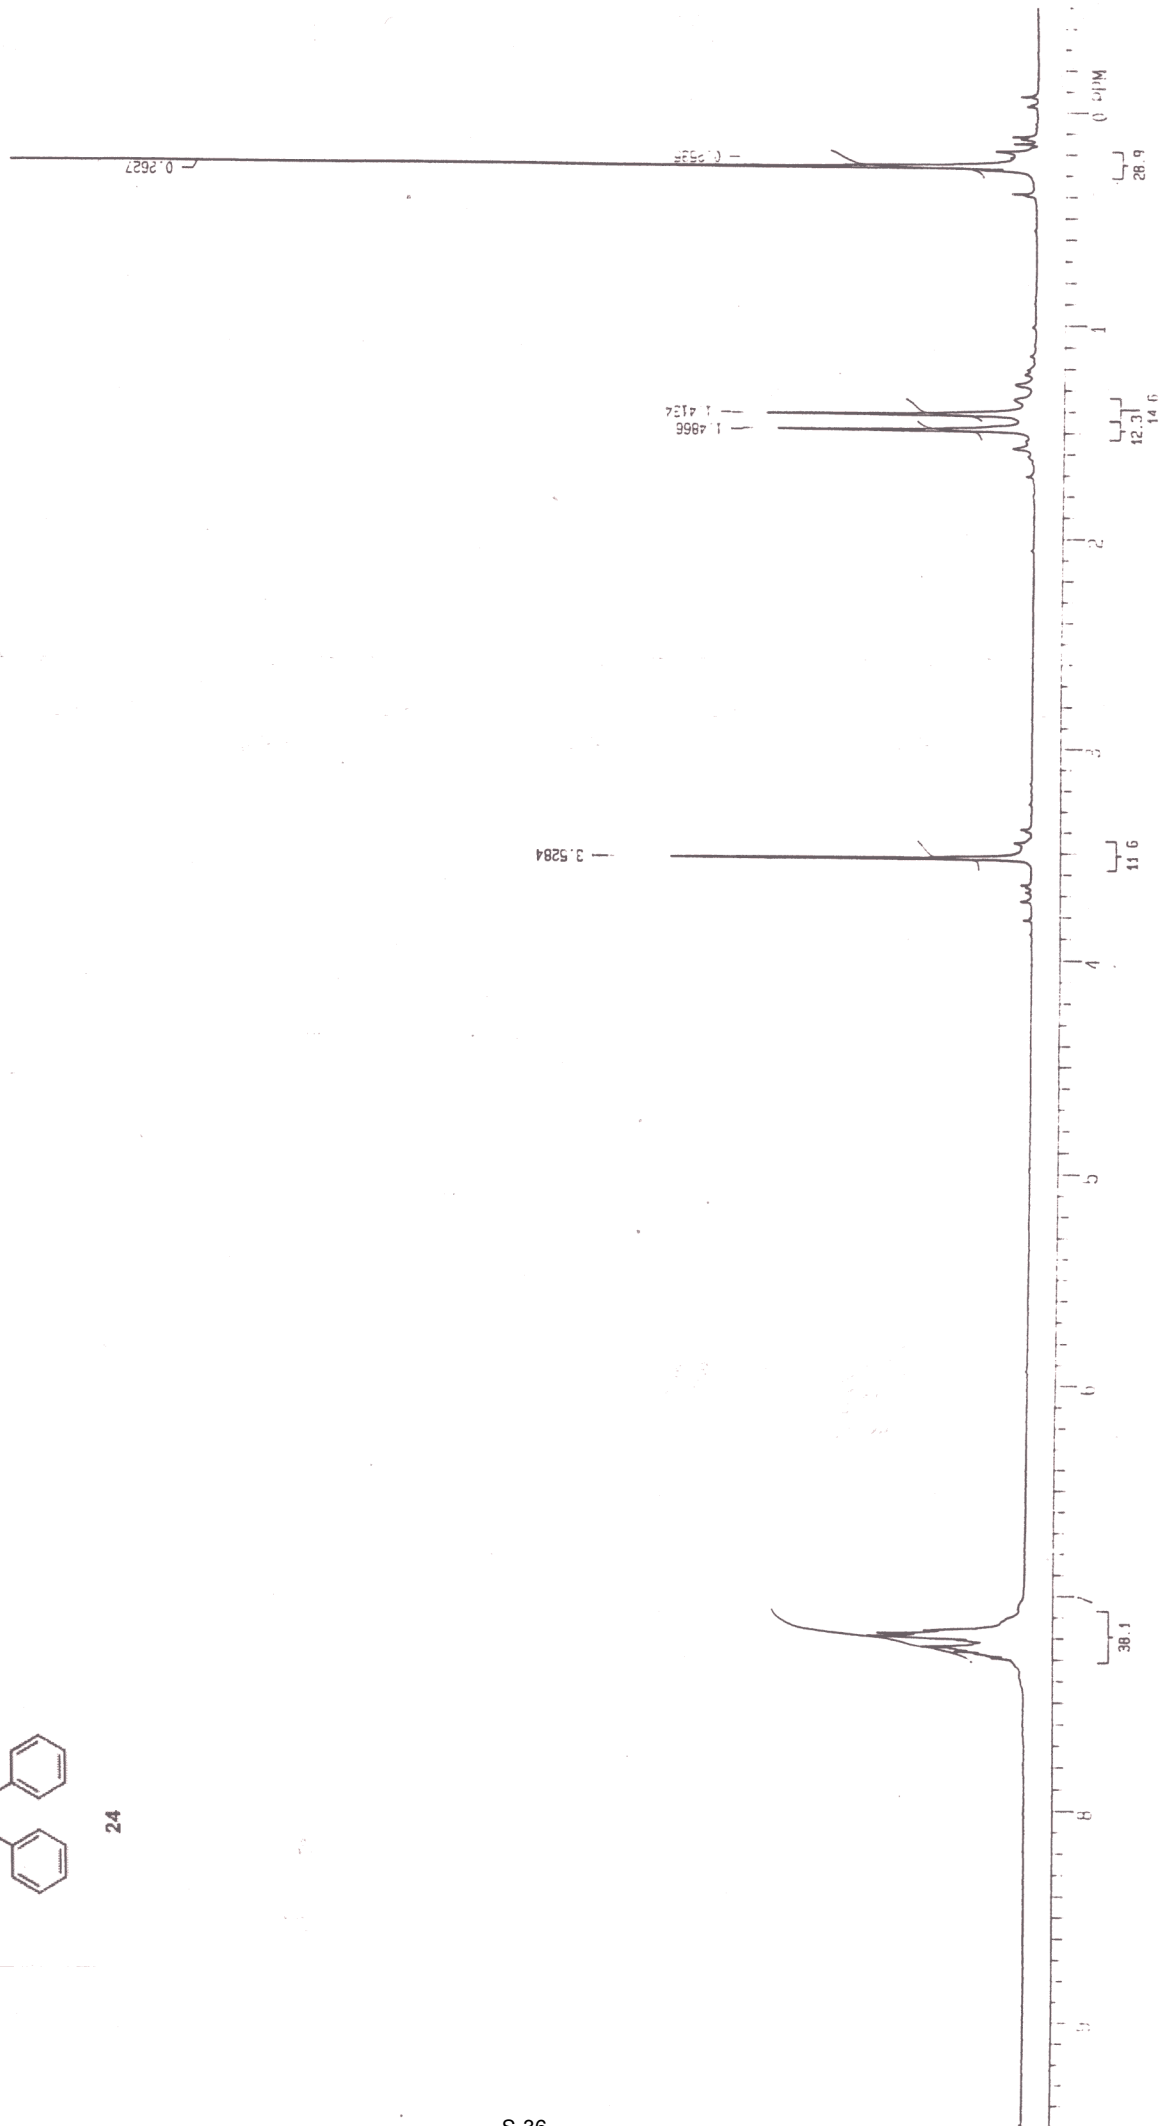

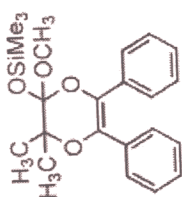

24

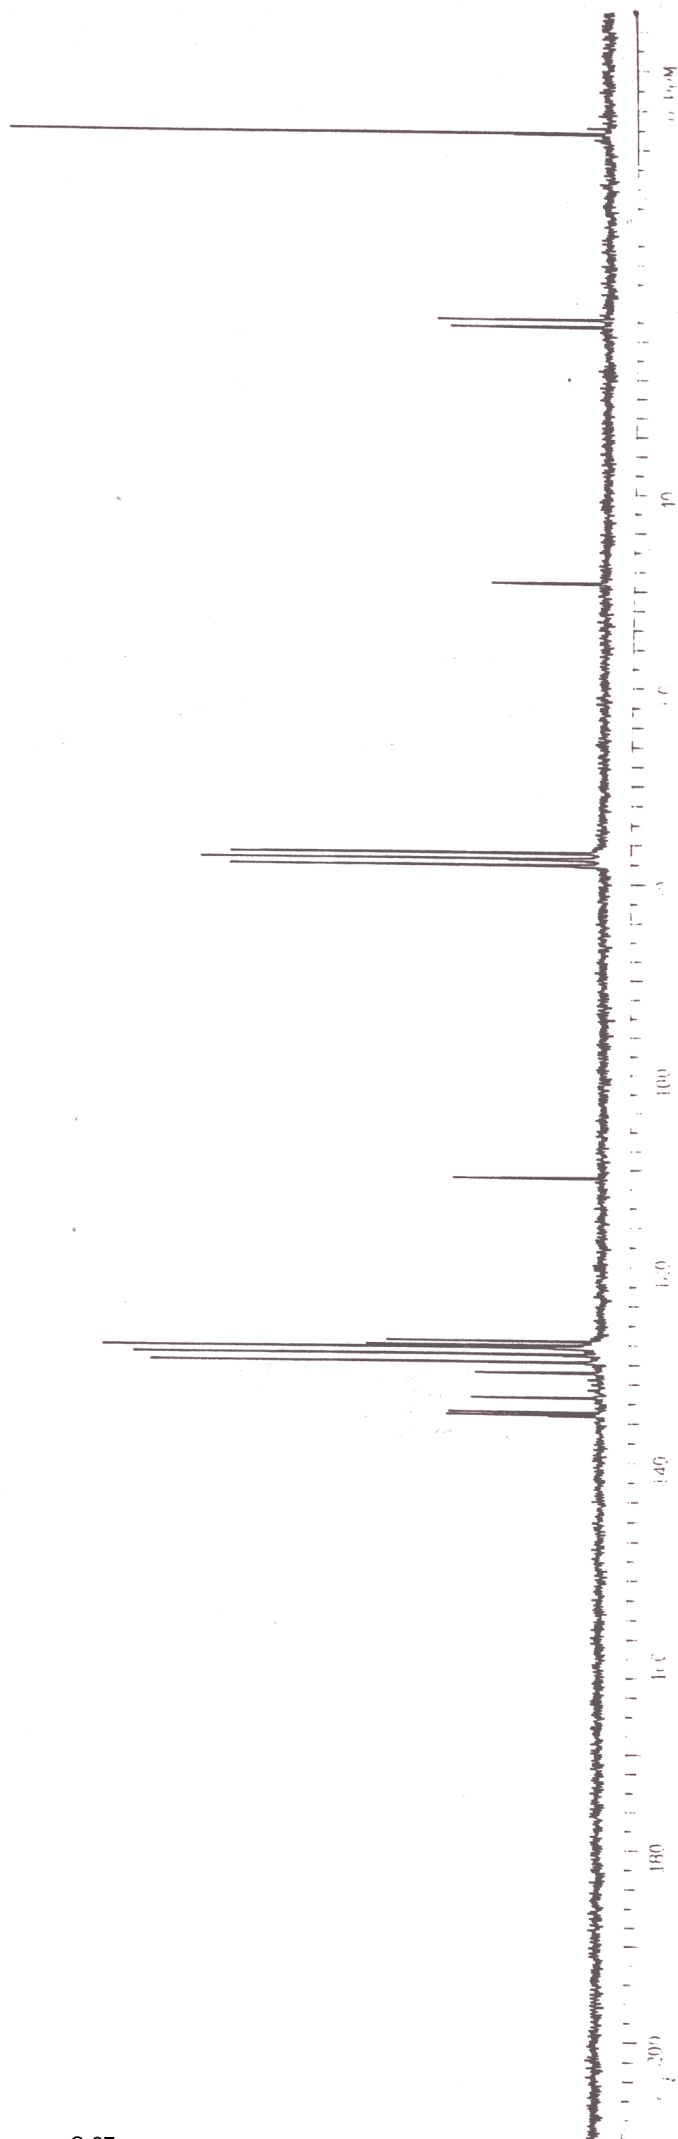

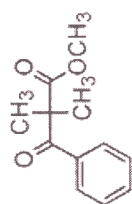

25

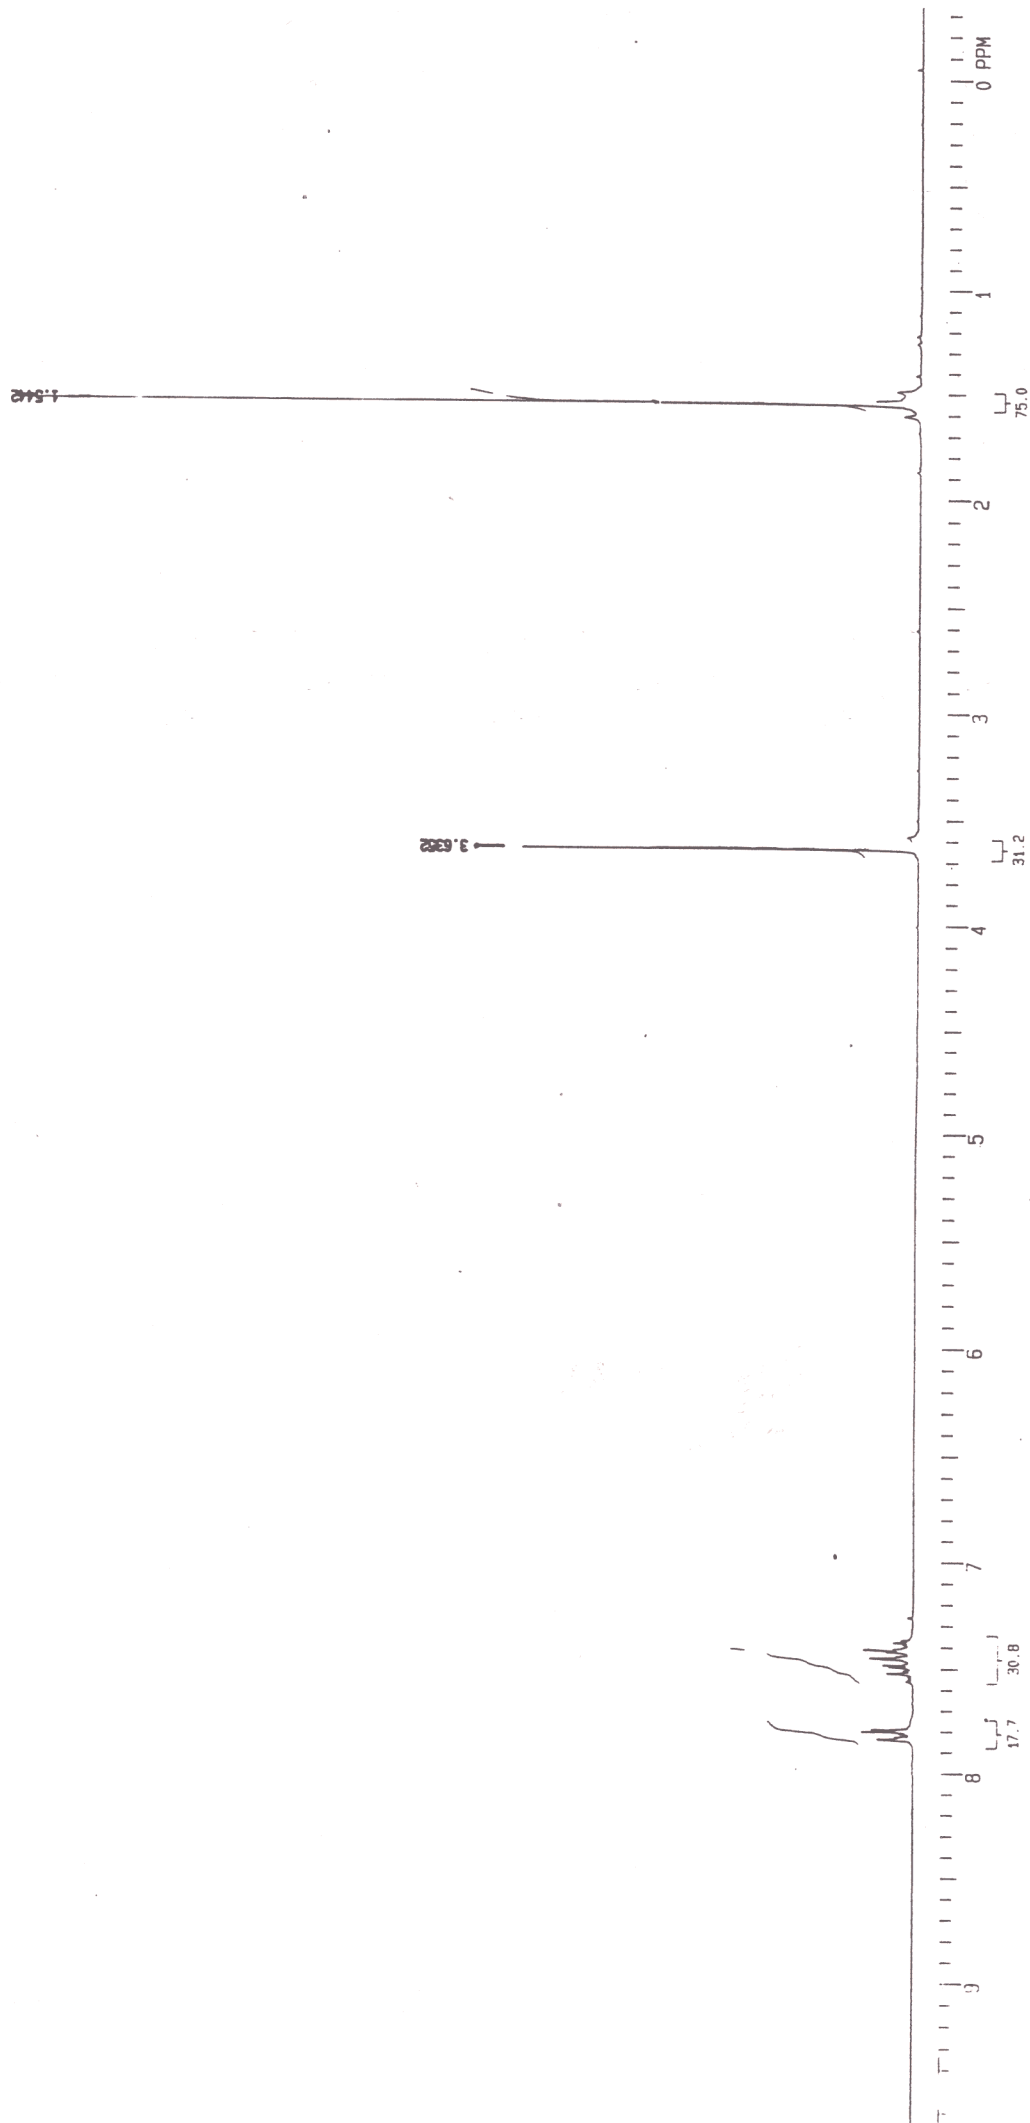

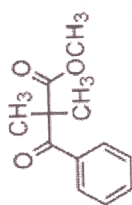

25

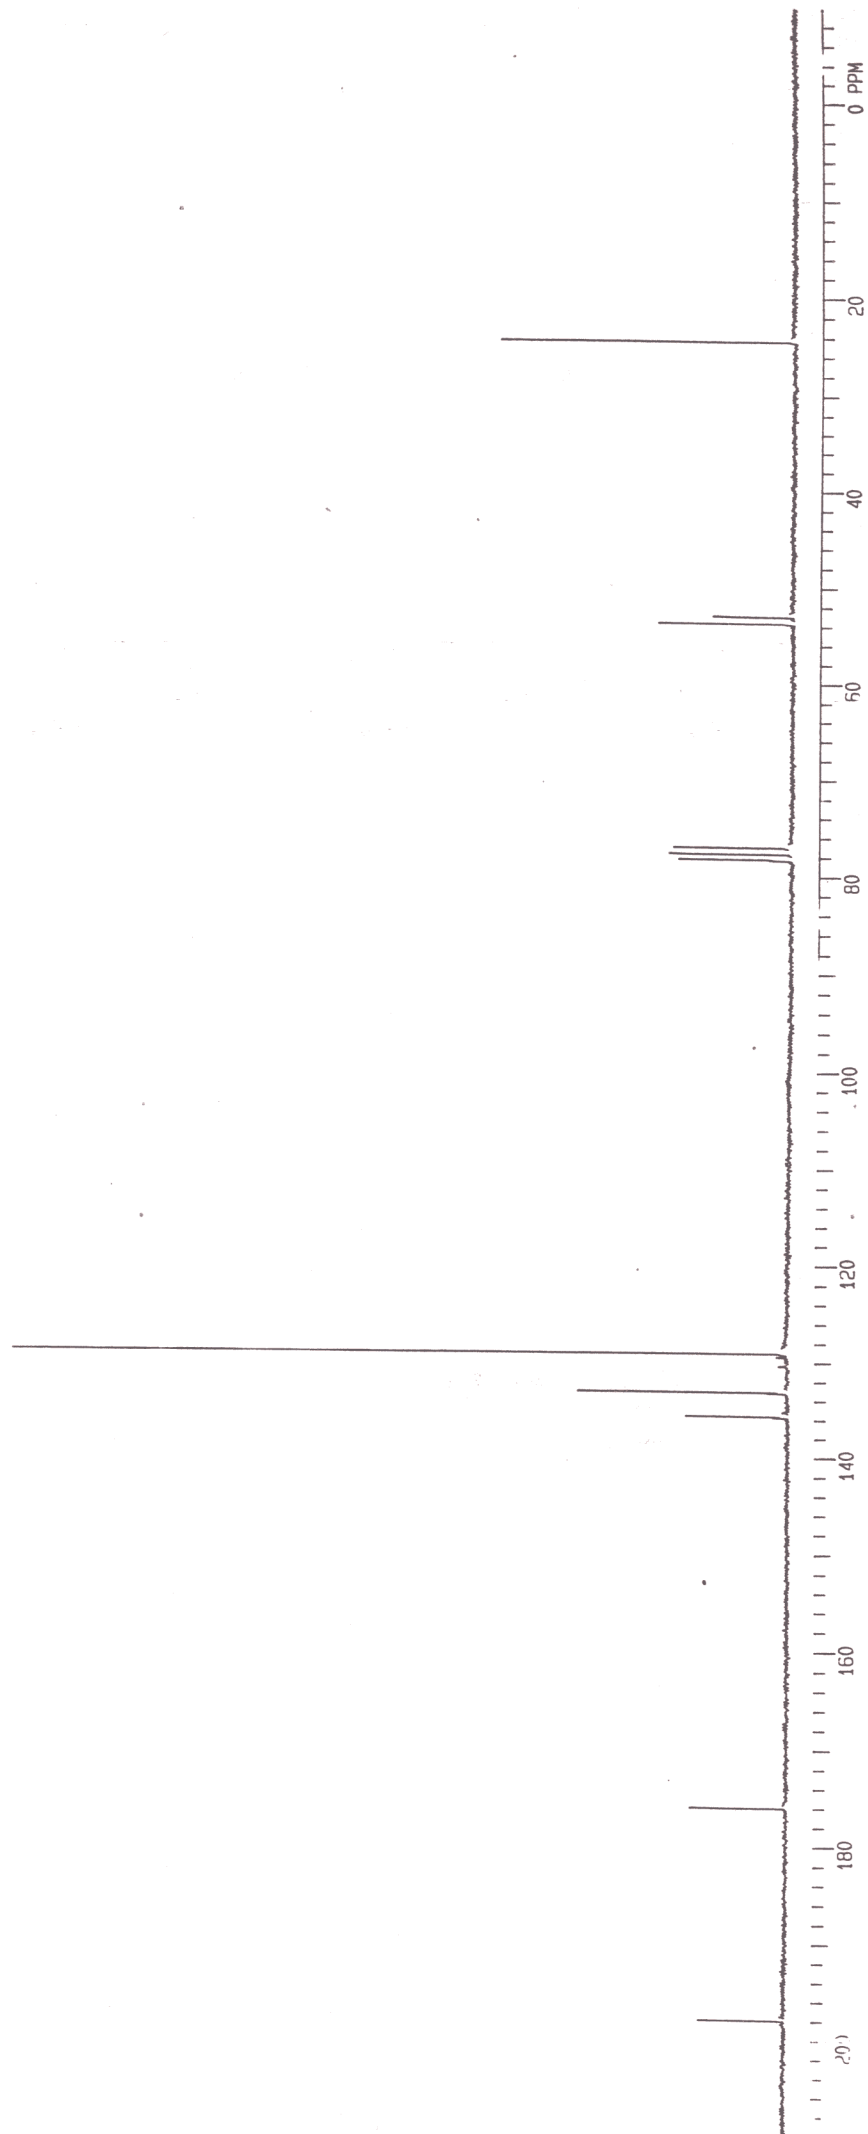

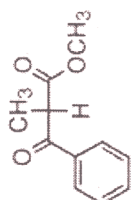

26

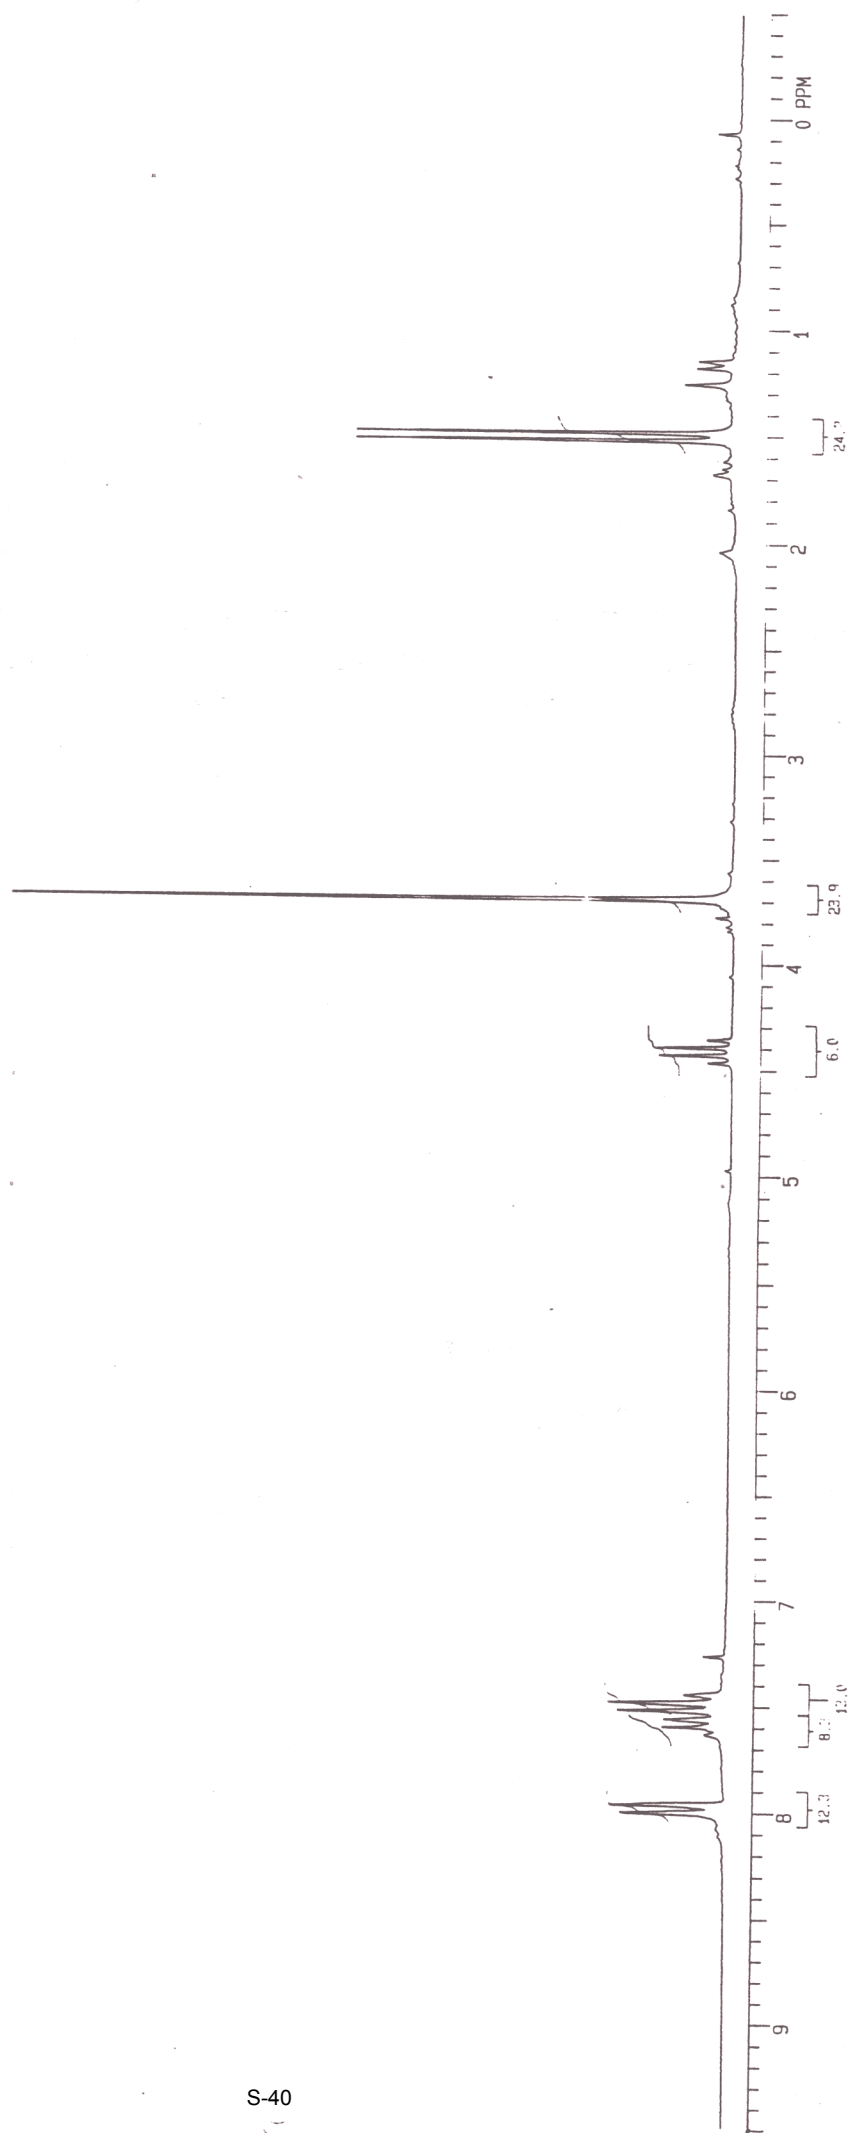

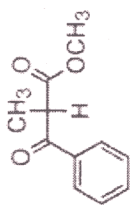

26

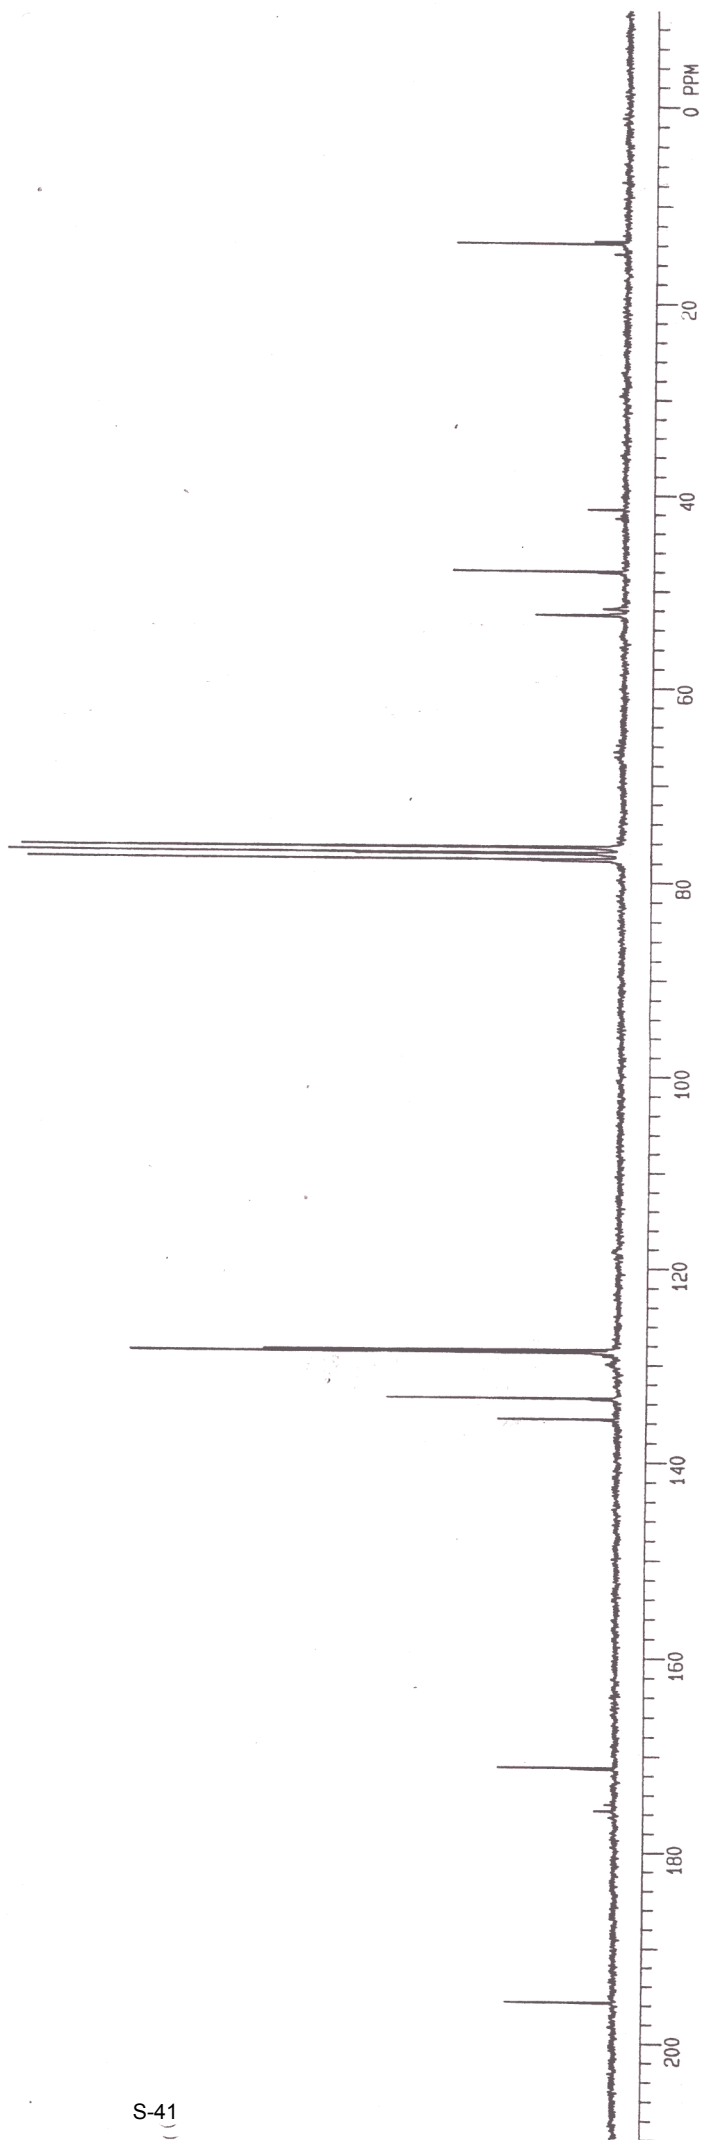

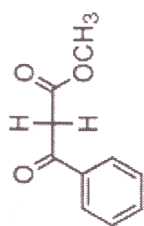

28

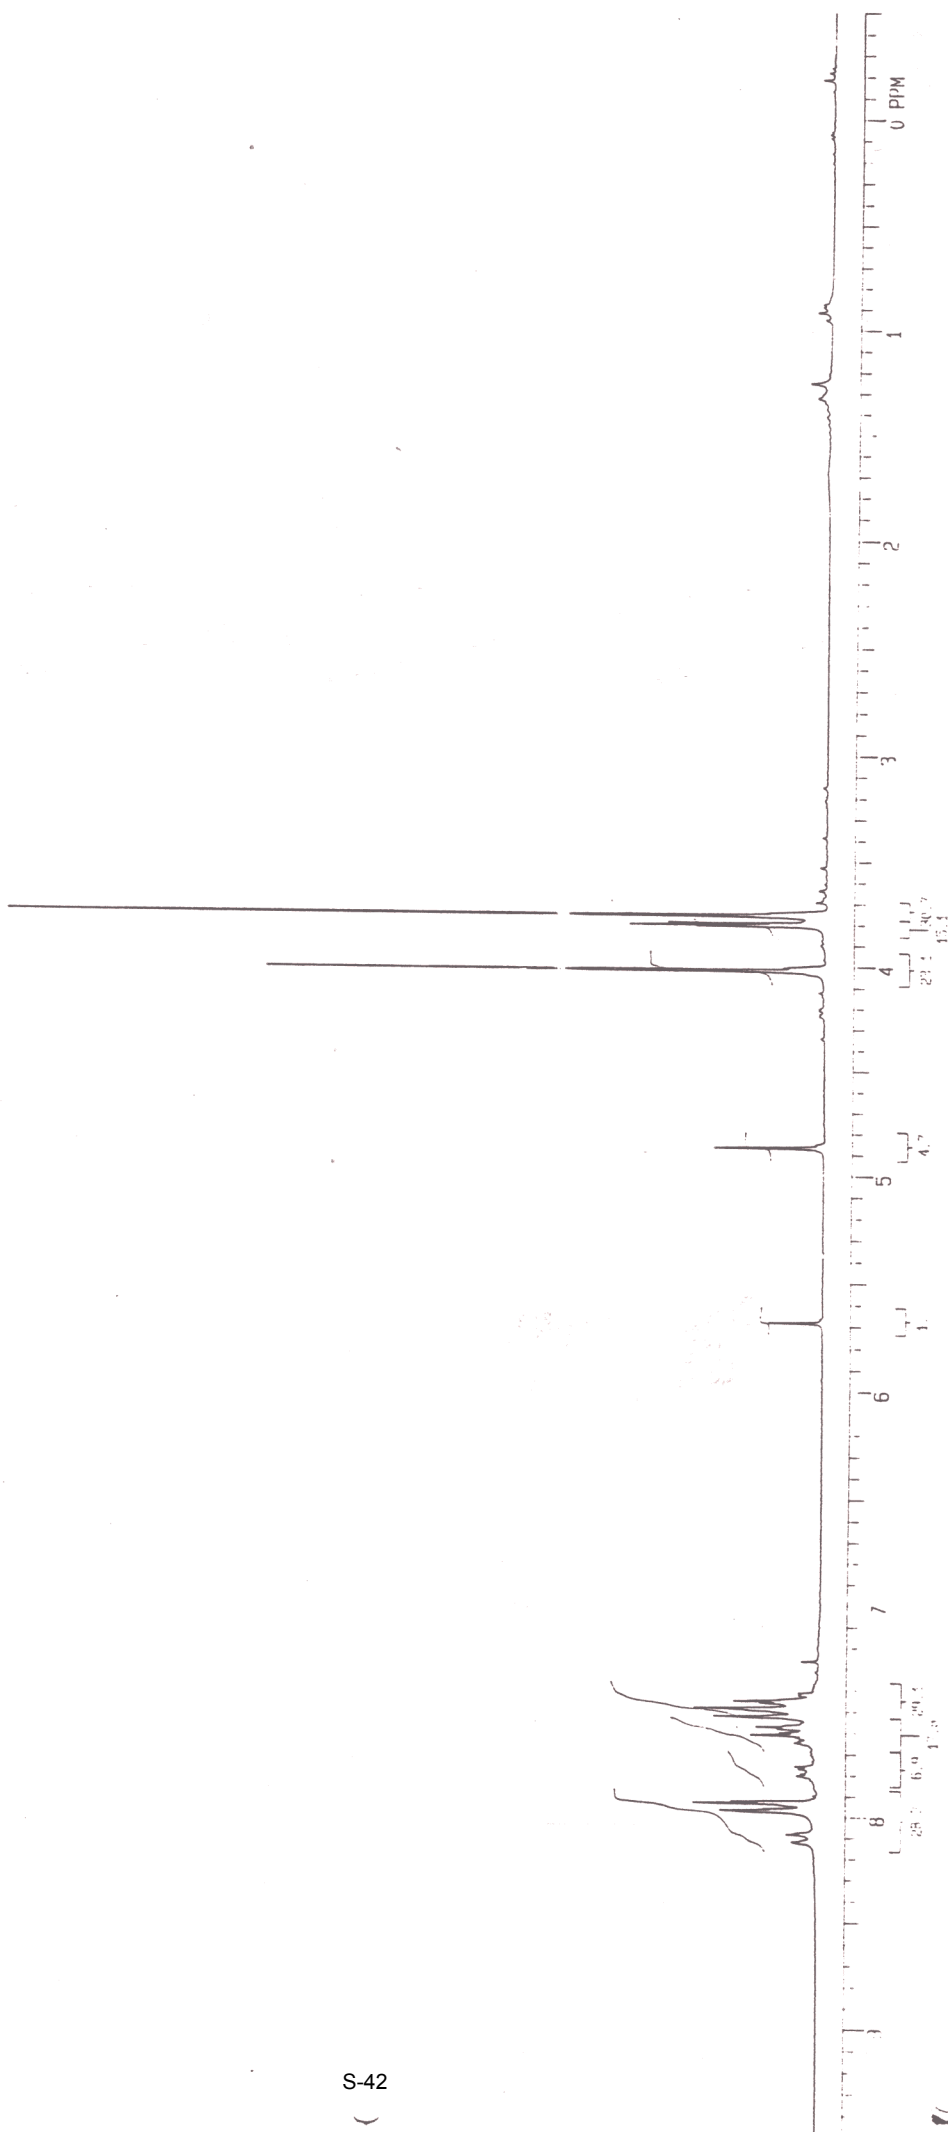

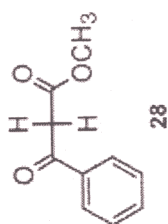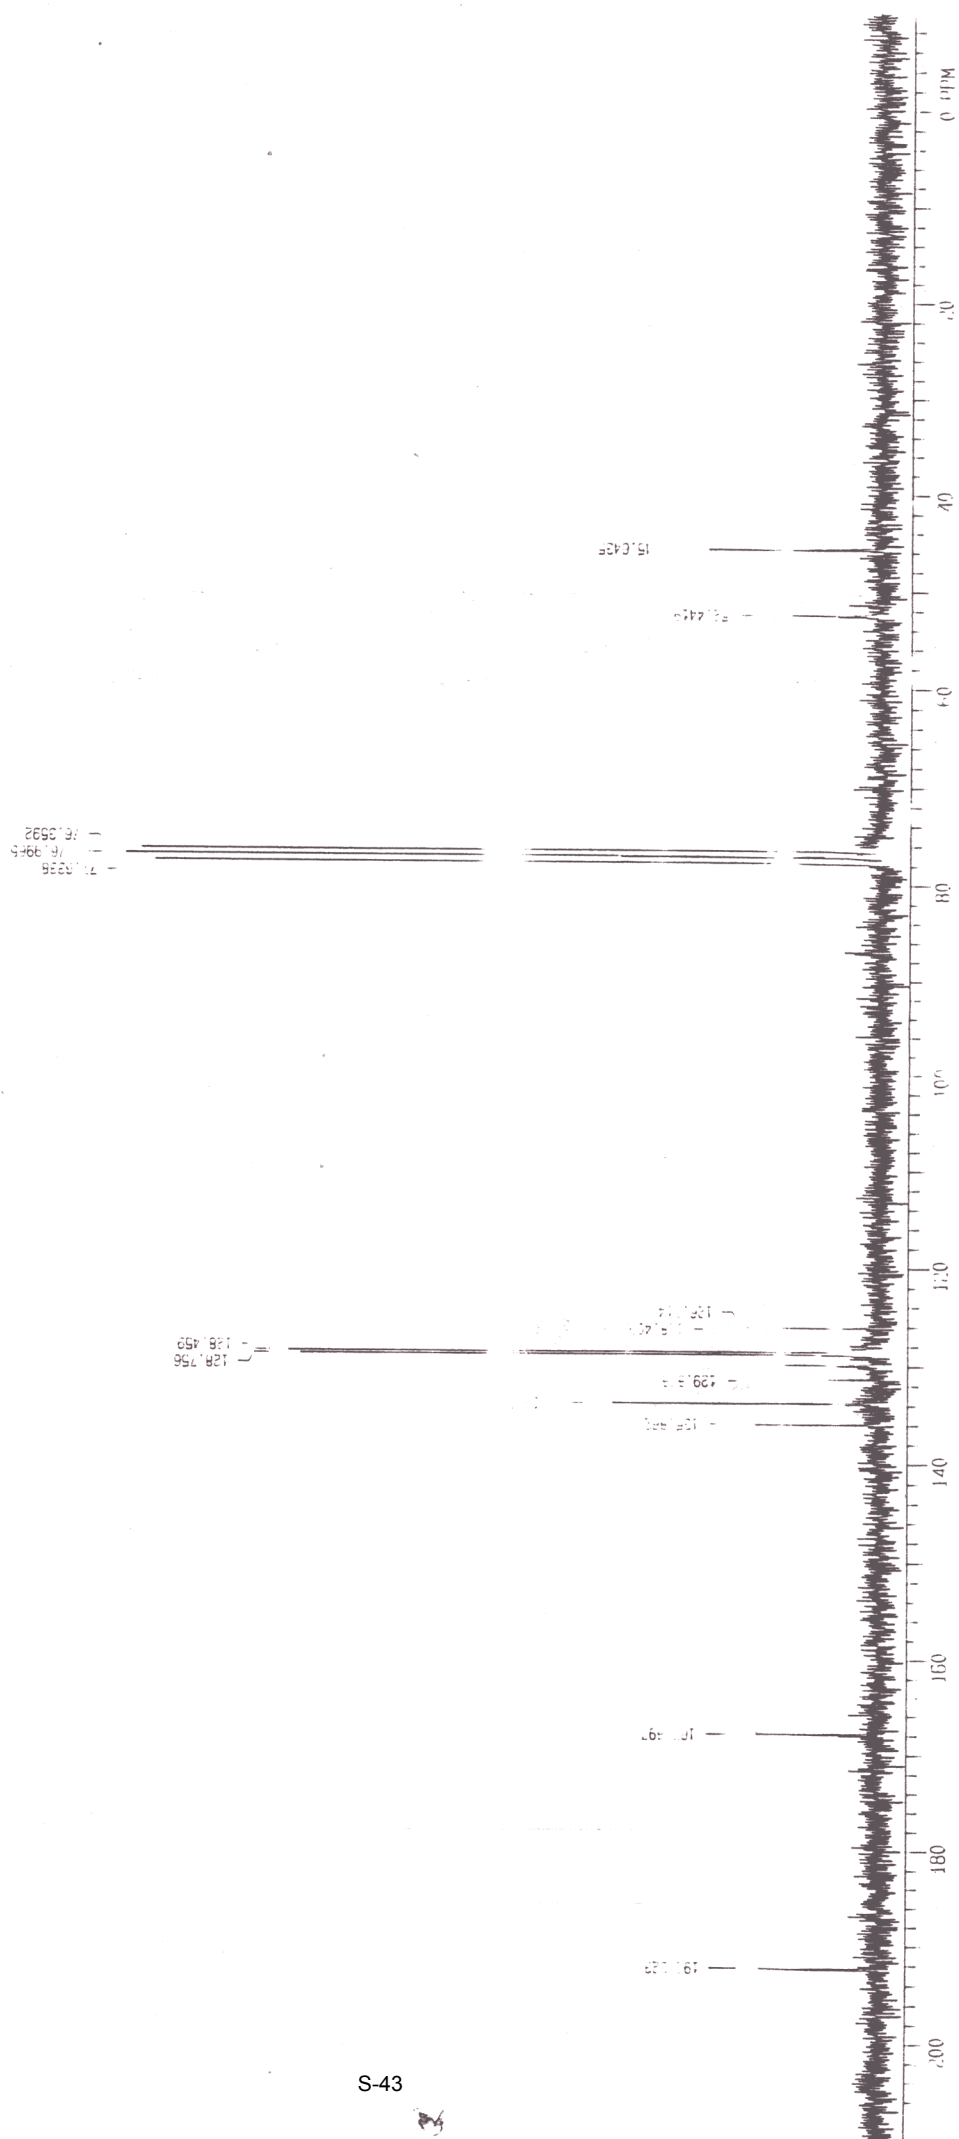



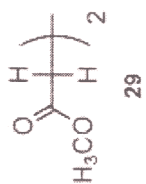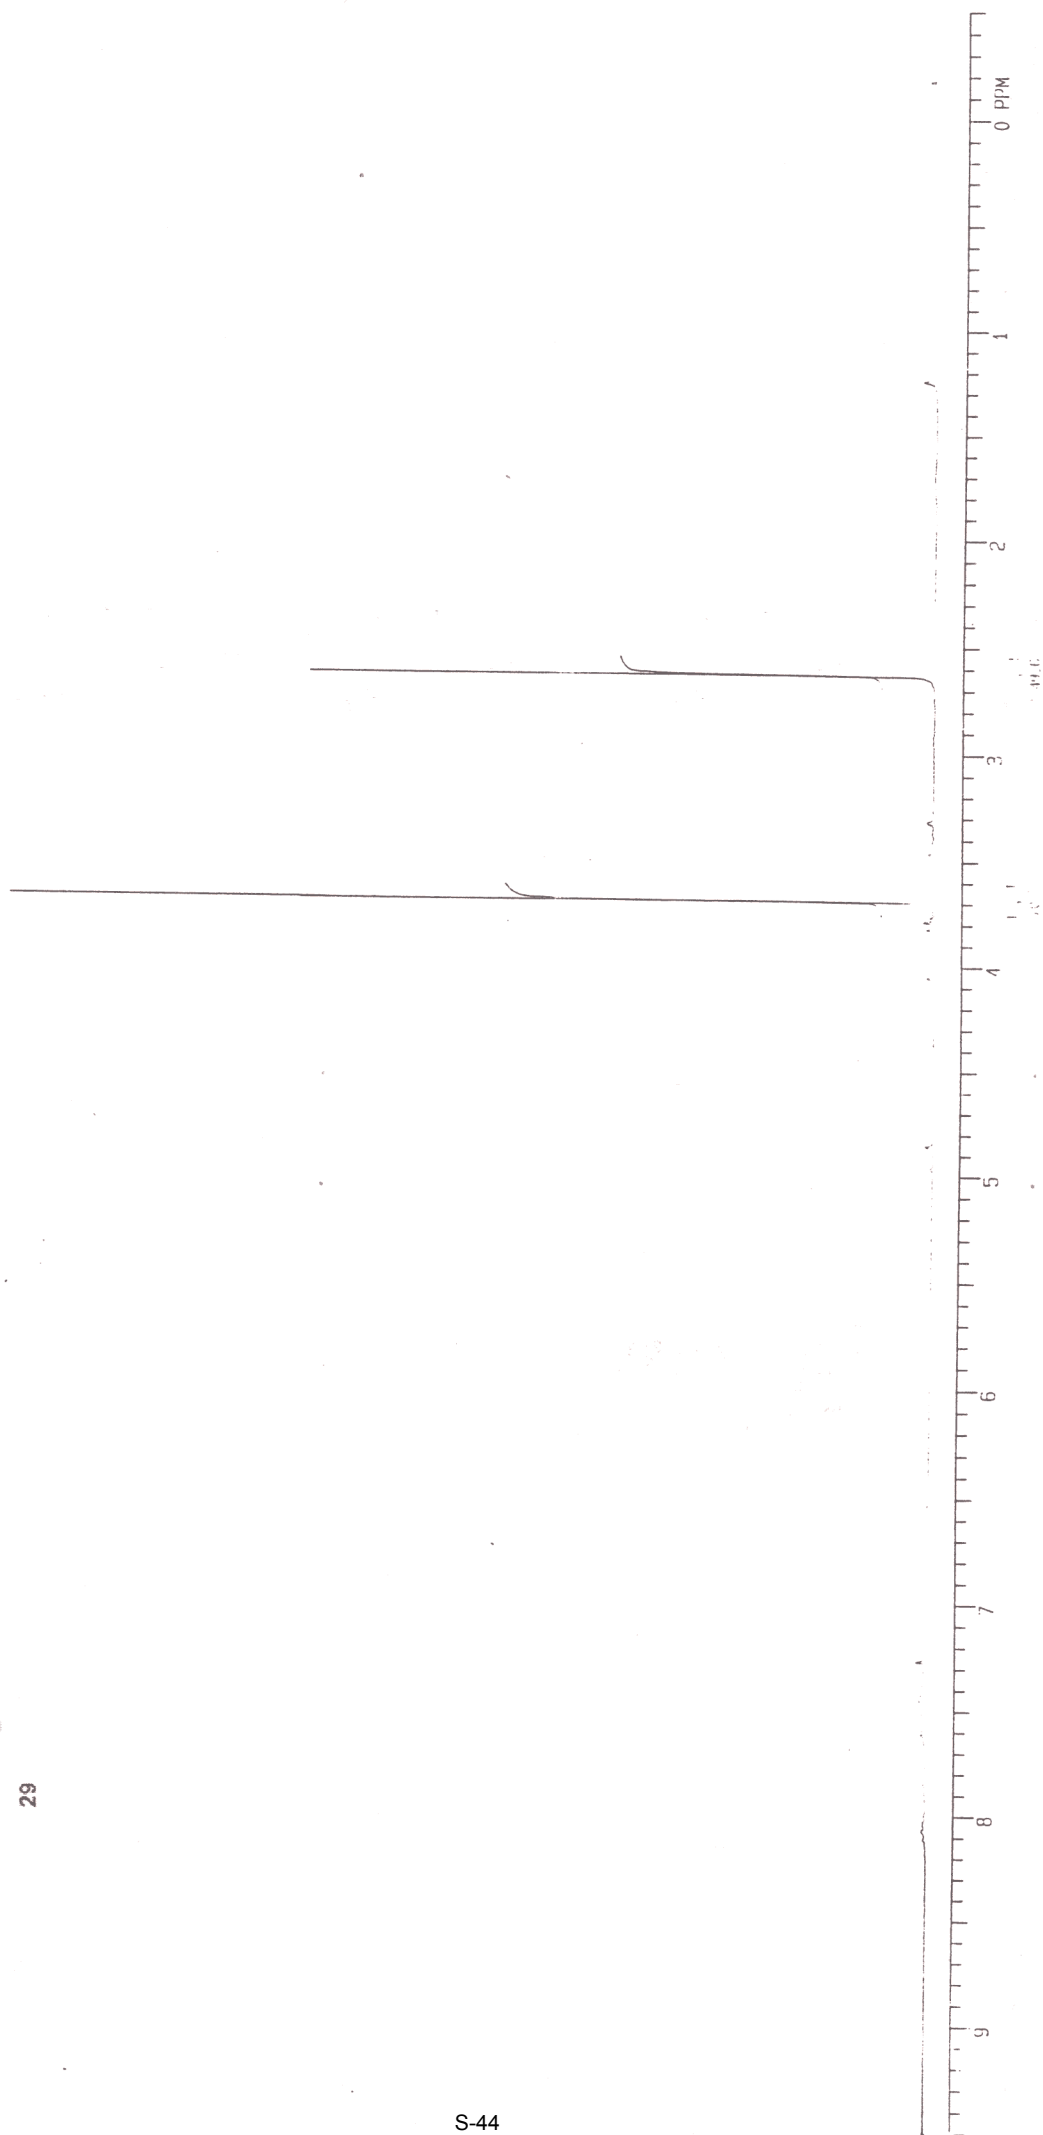

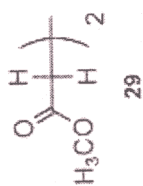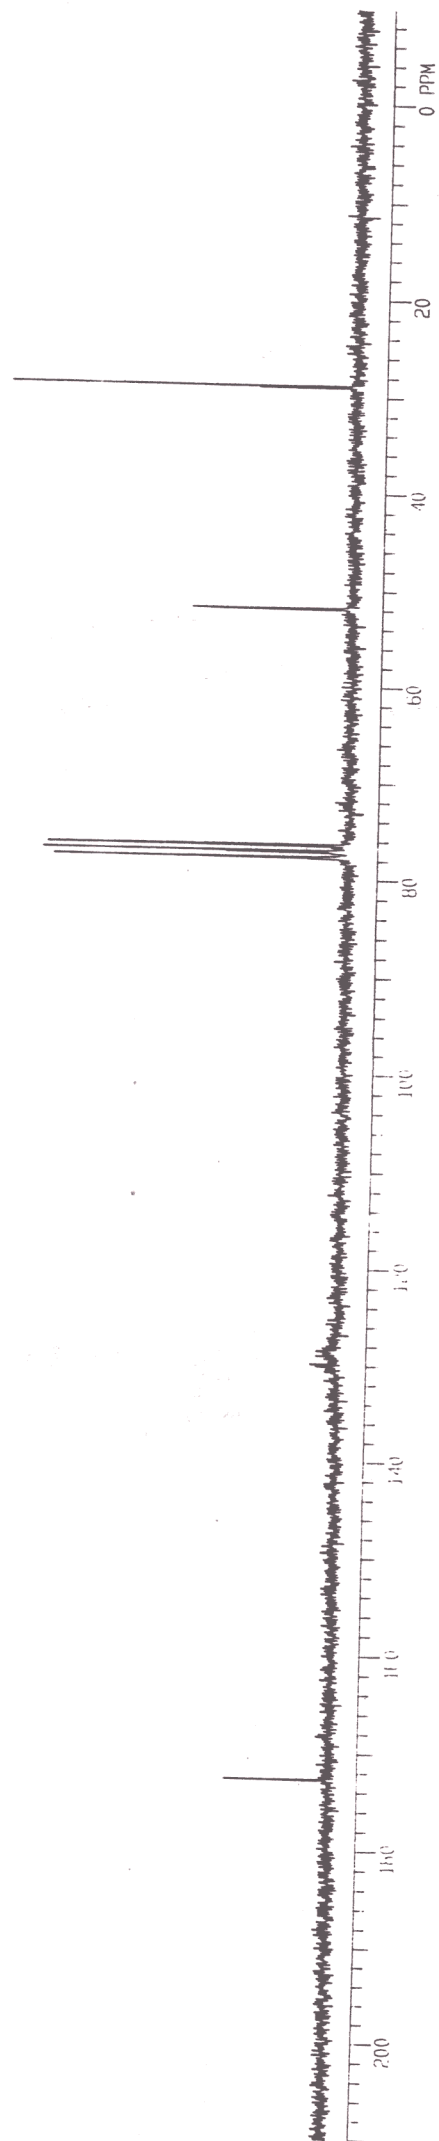

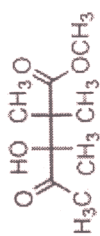

30

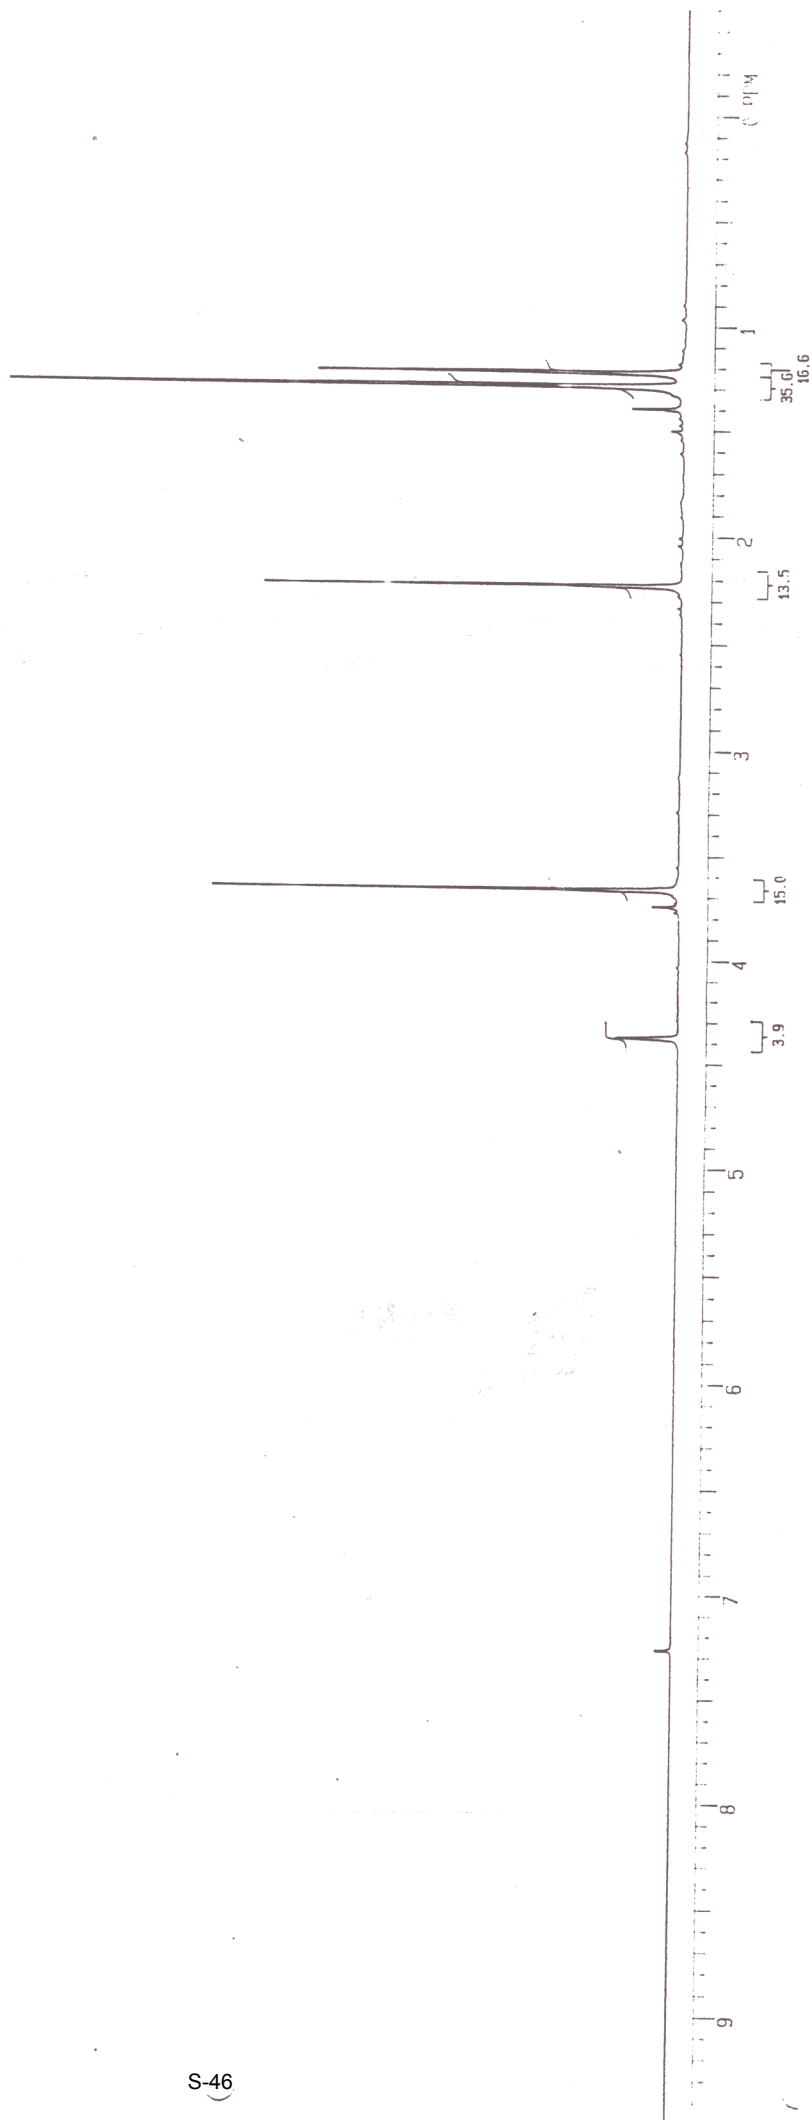

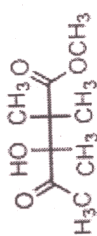

30

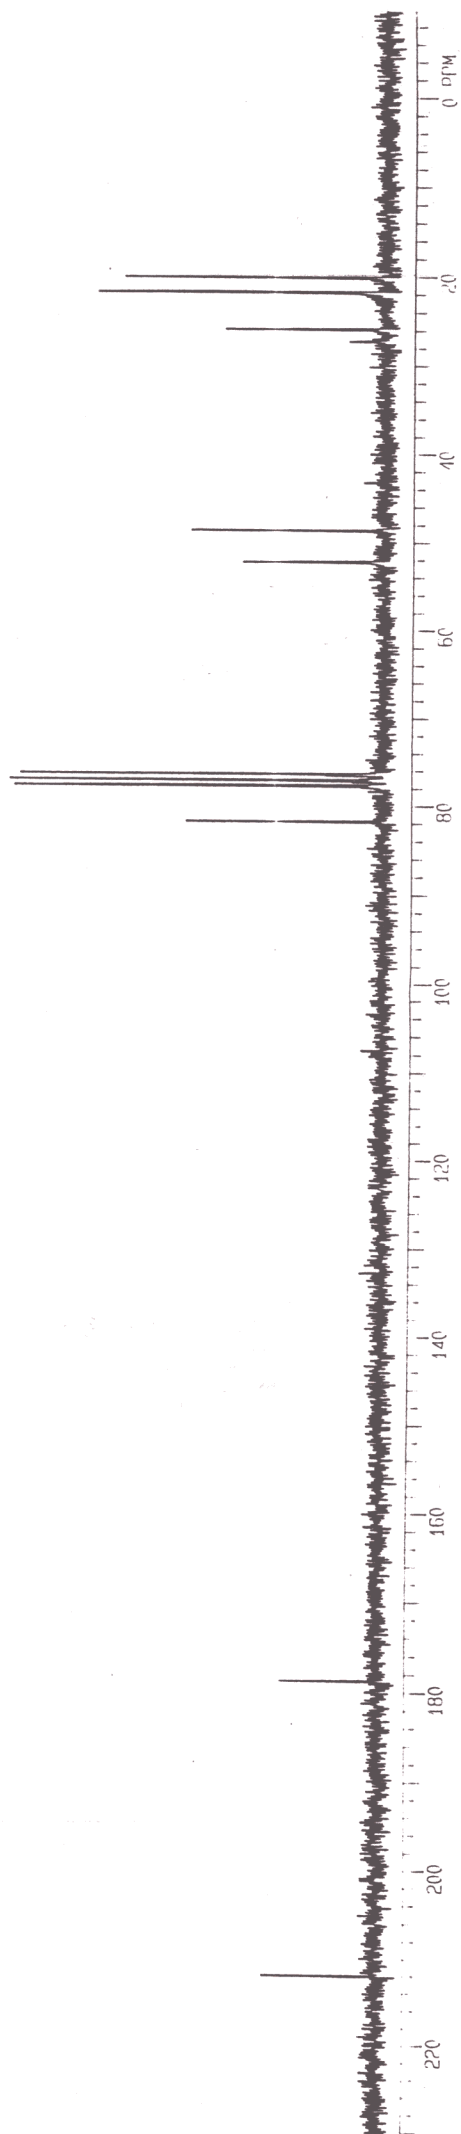

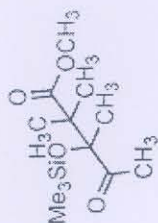

31

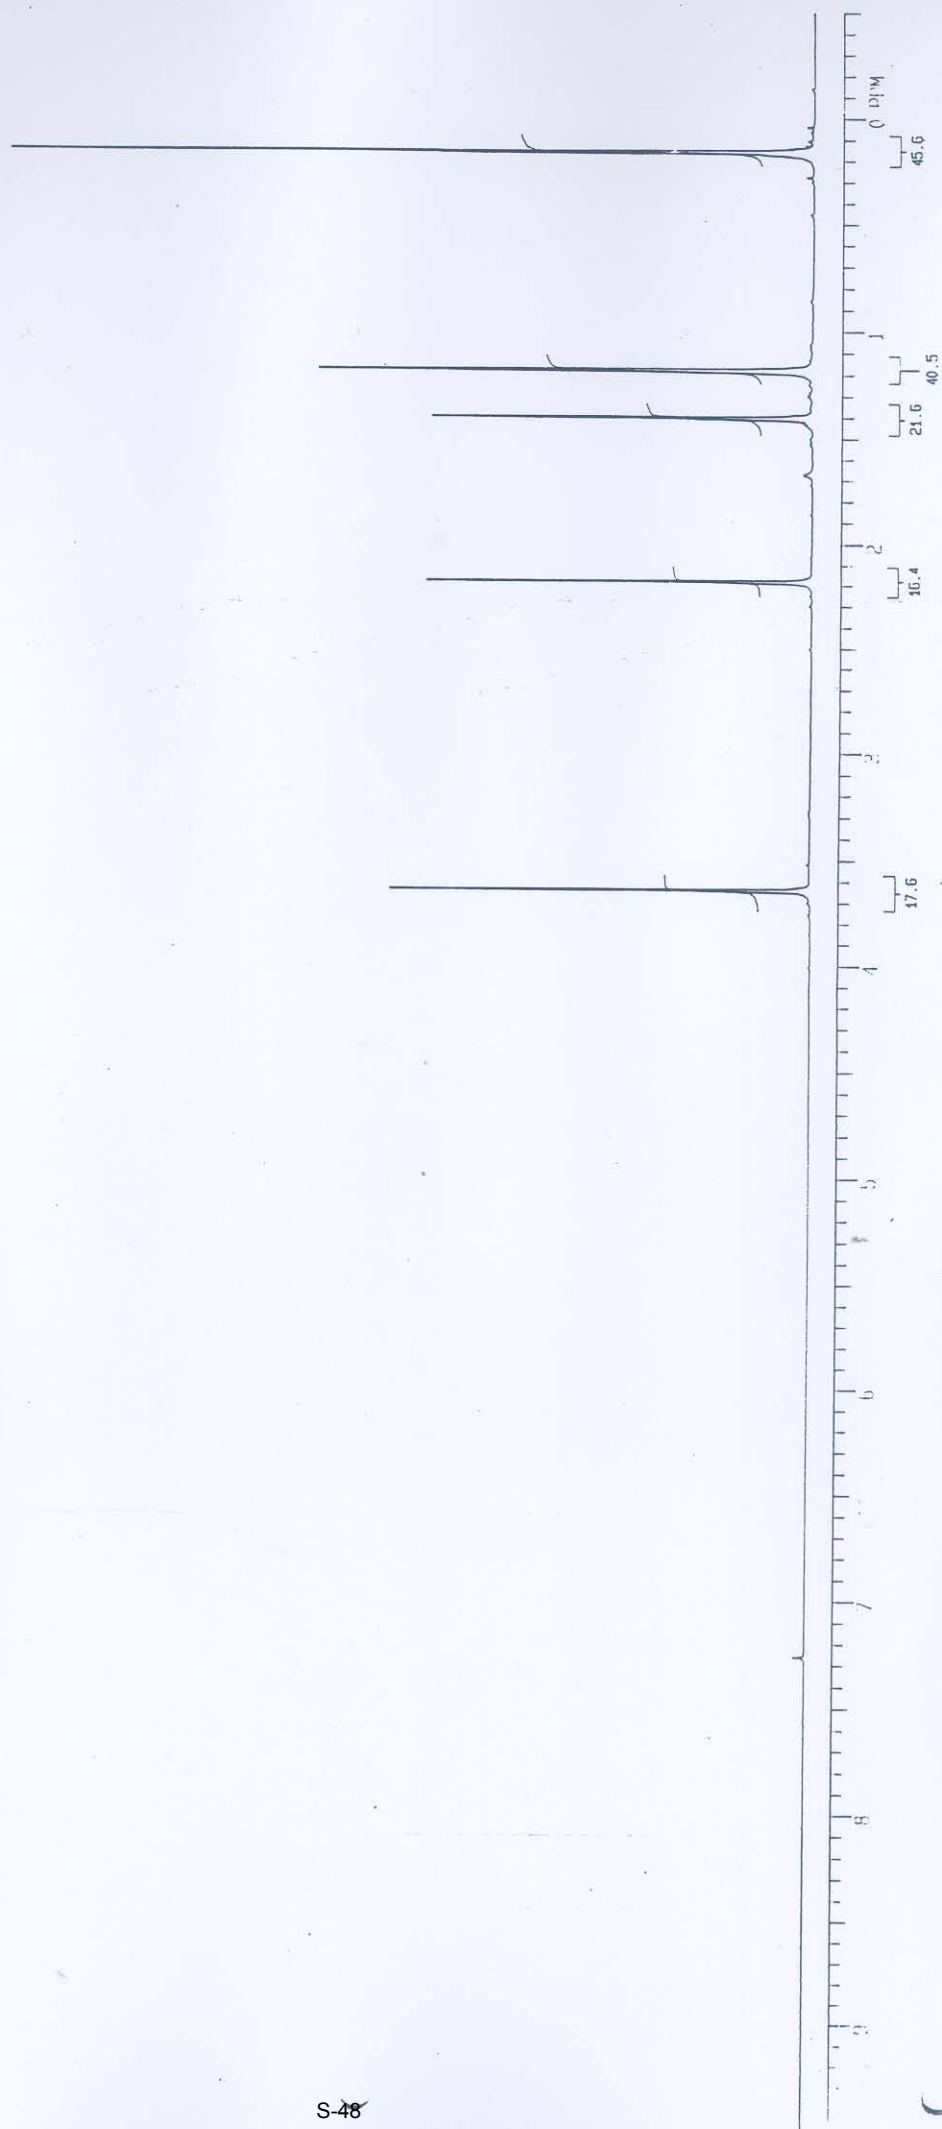

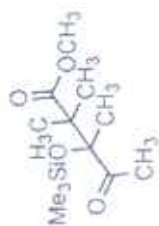

31

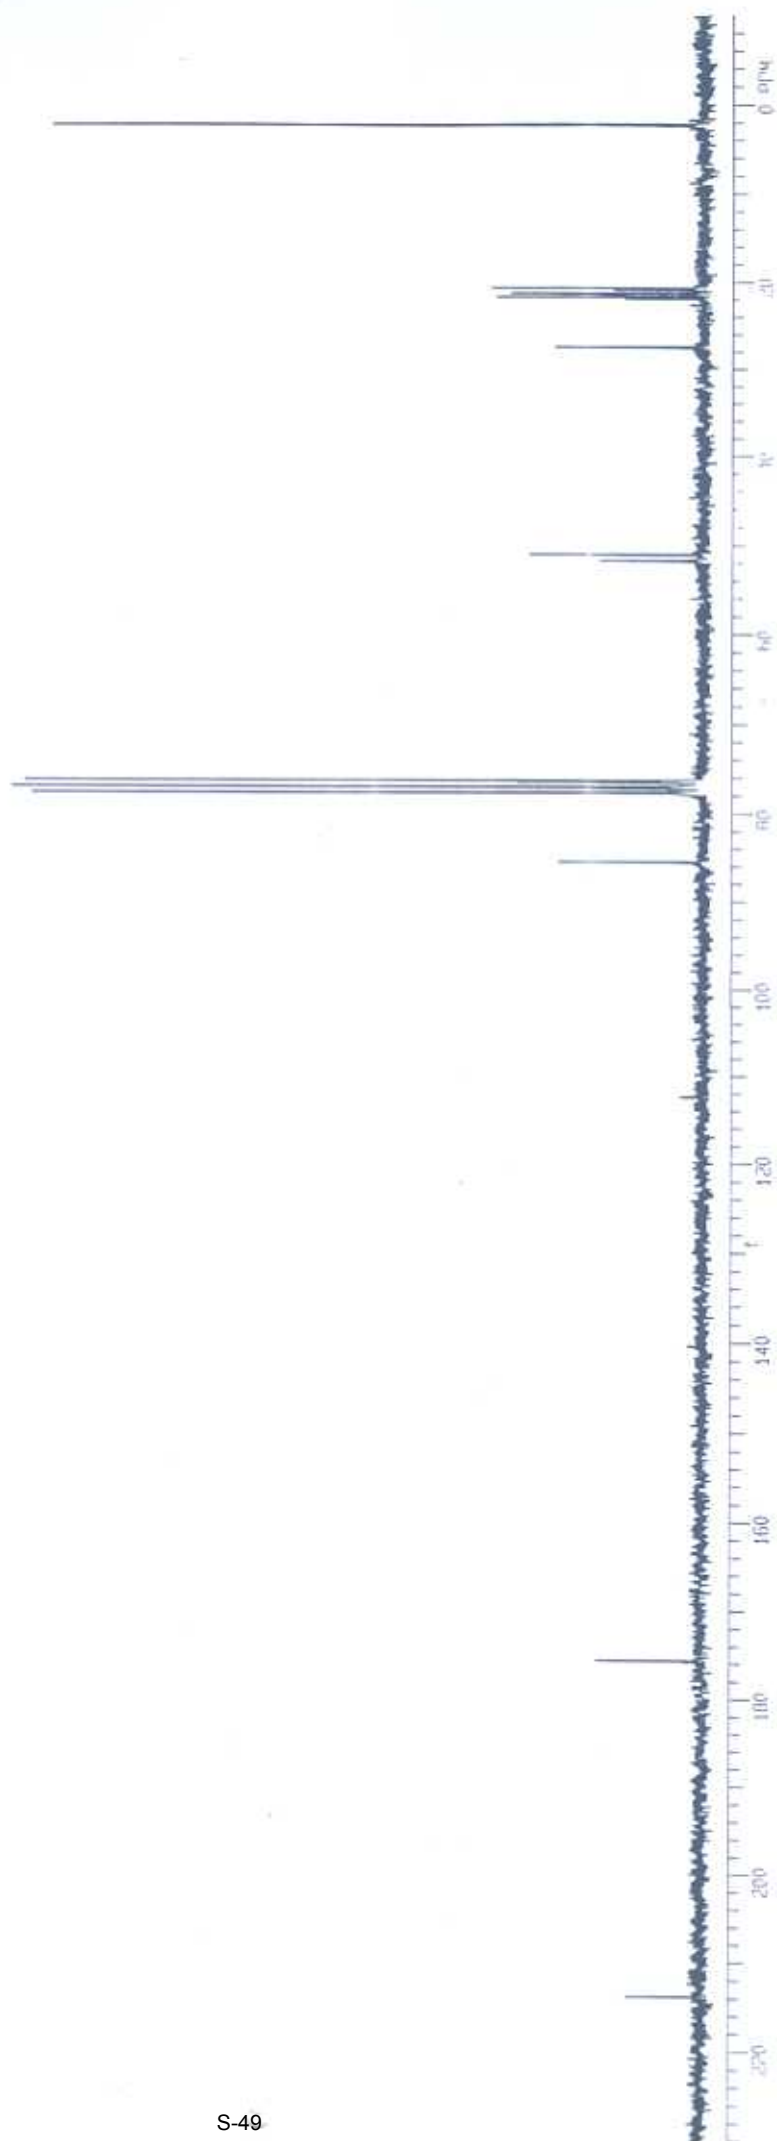

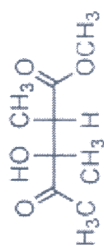

32

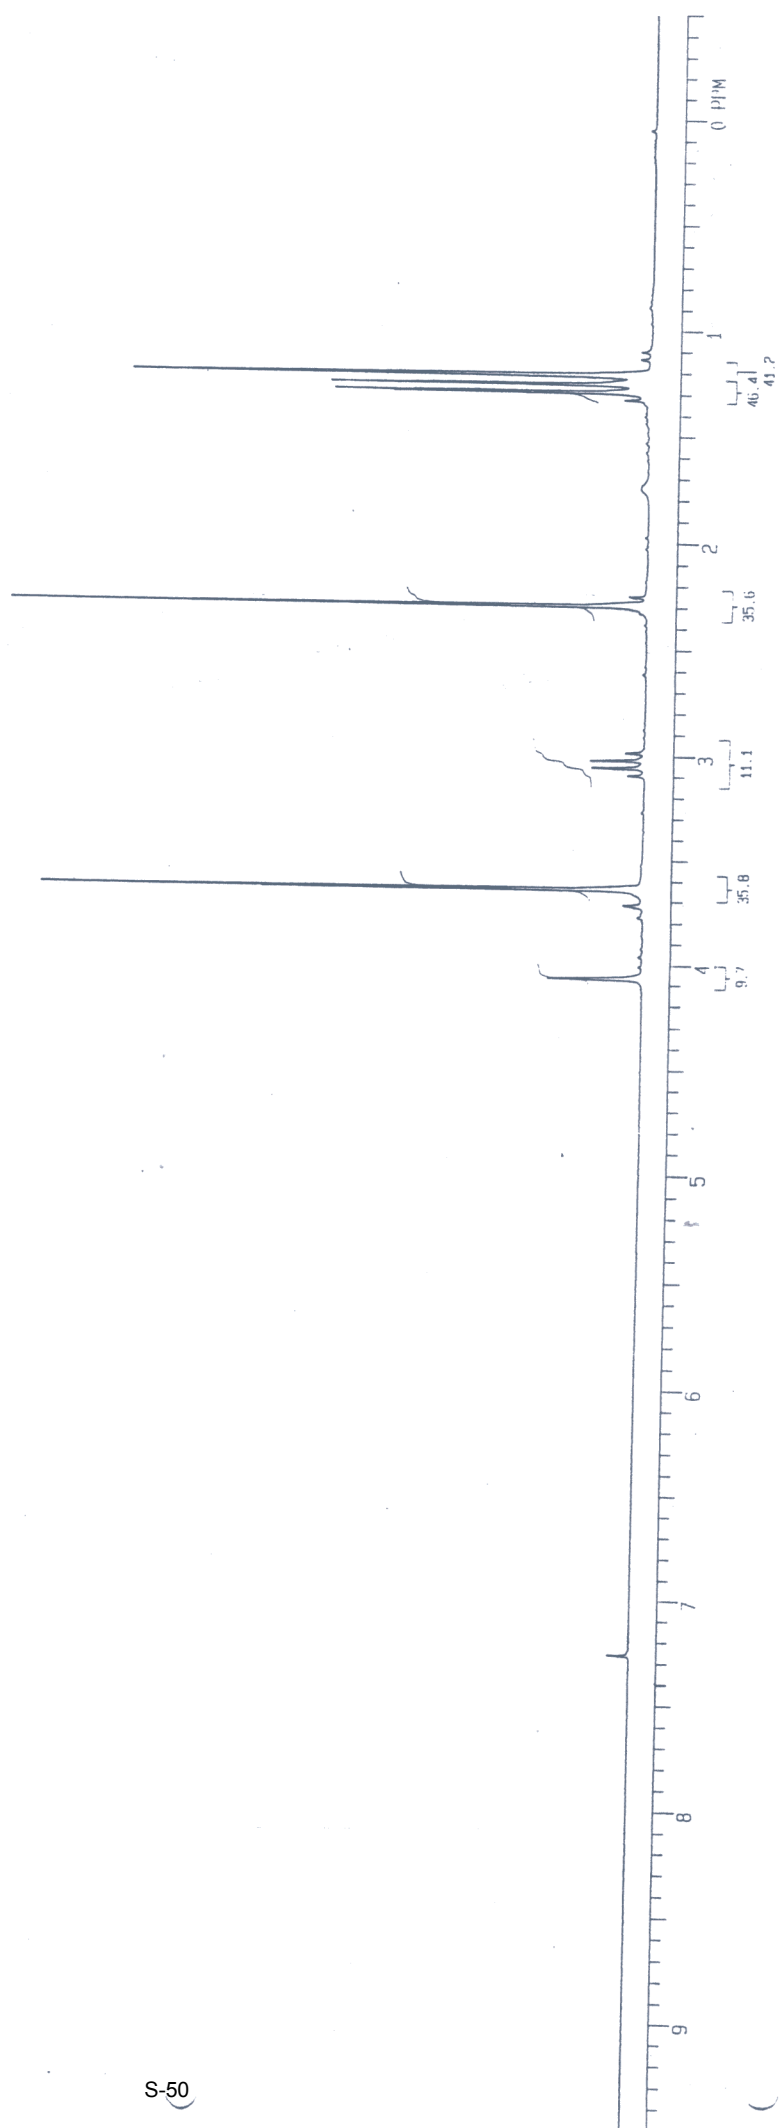

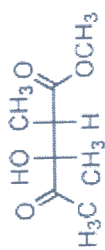

32

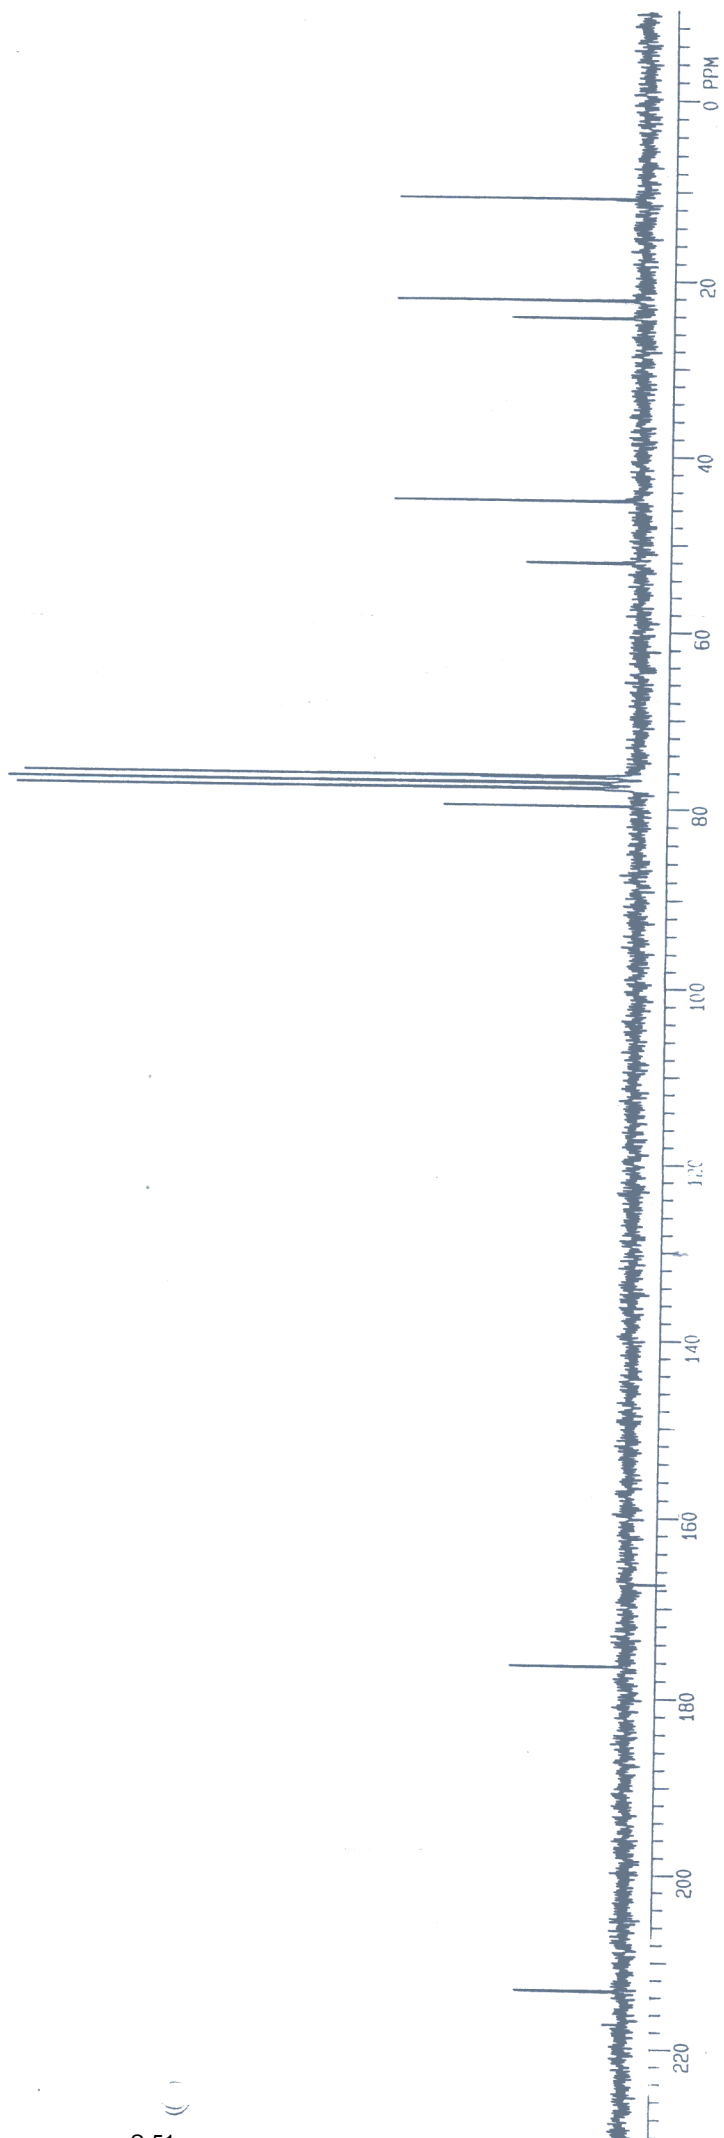



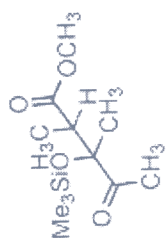

33

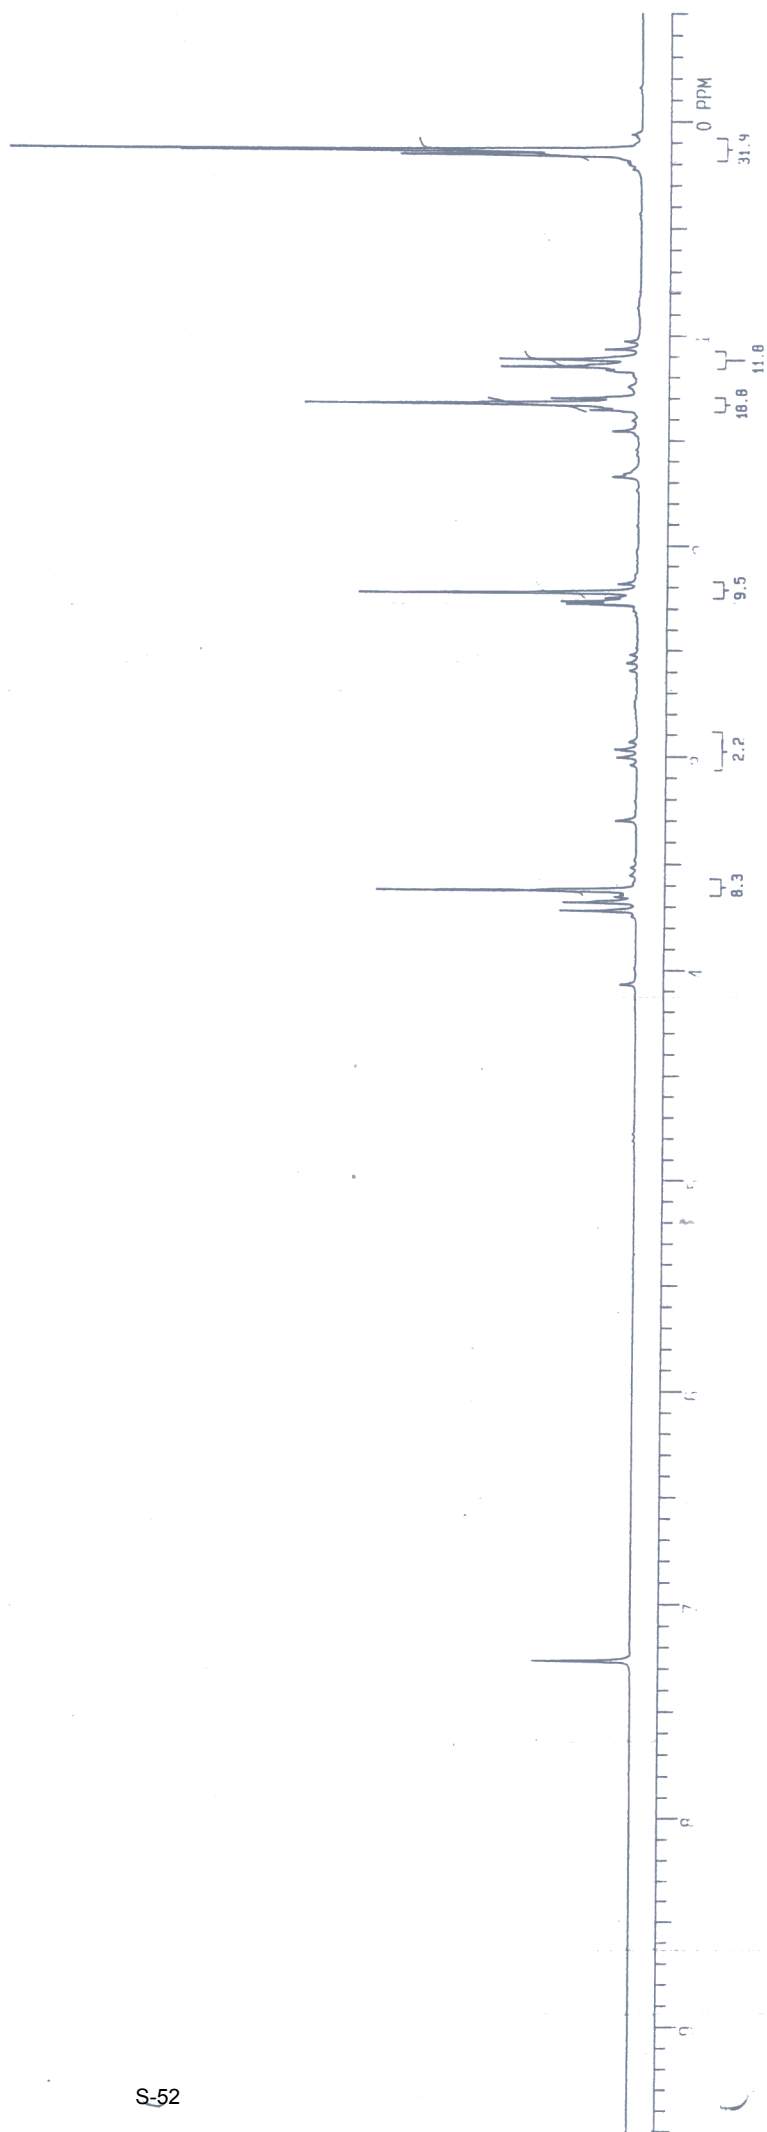

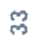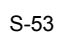

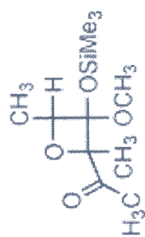

34

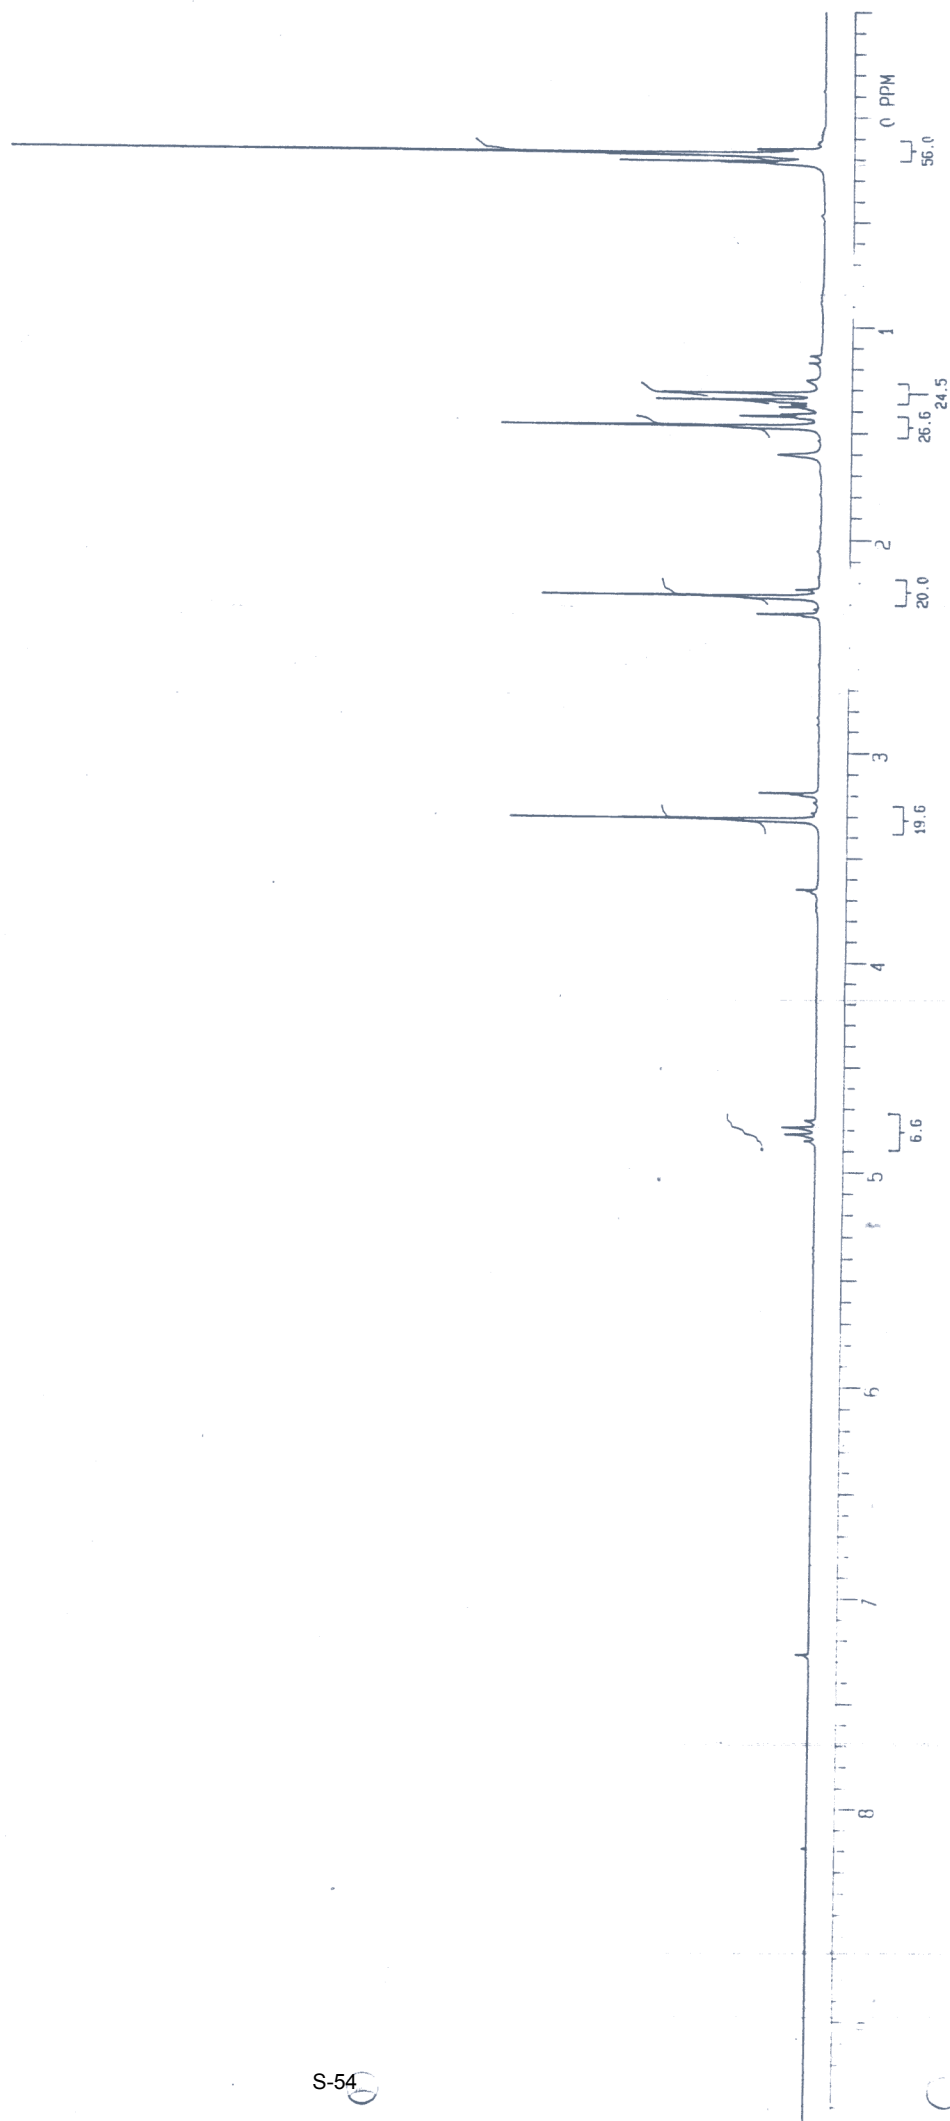

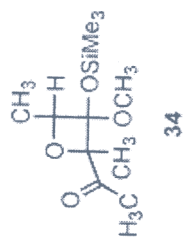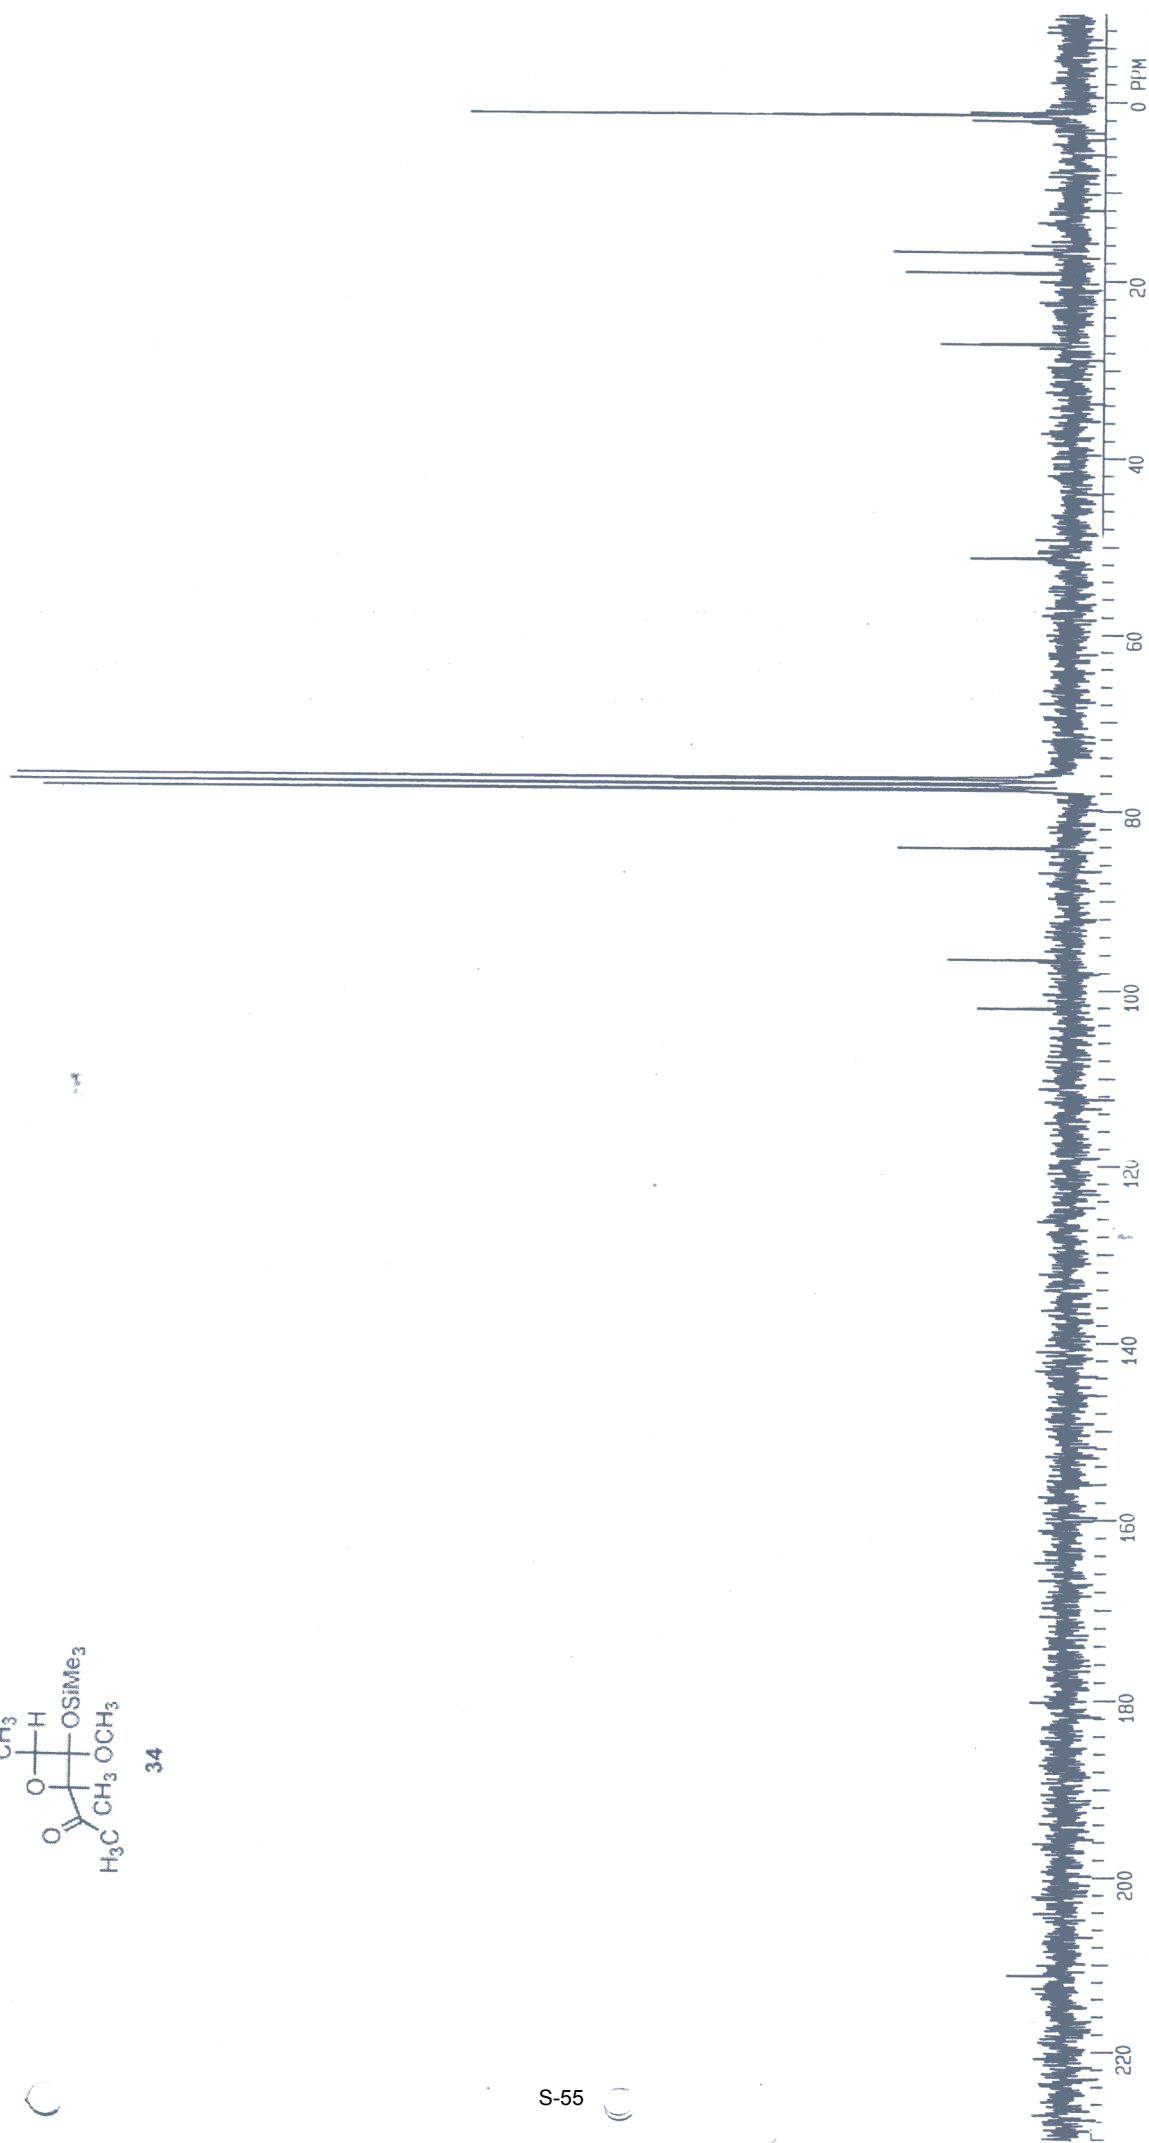

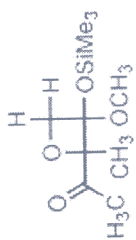

350+356

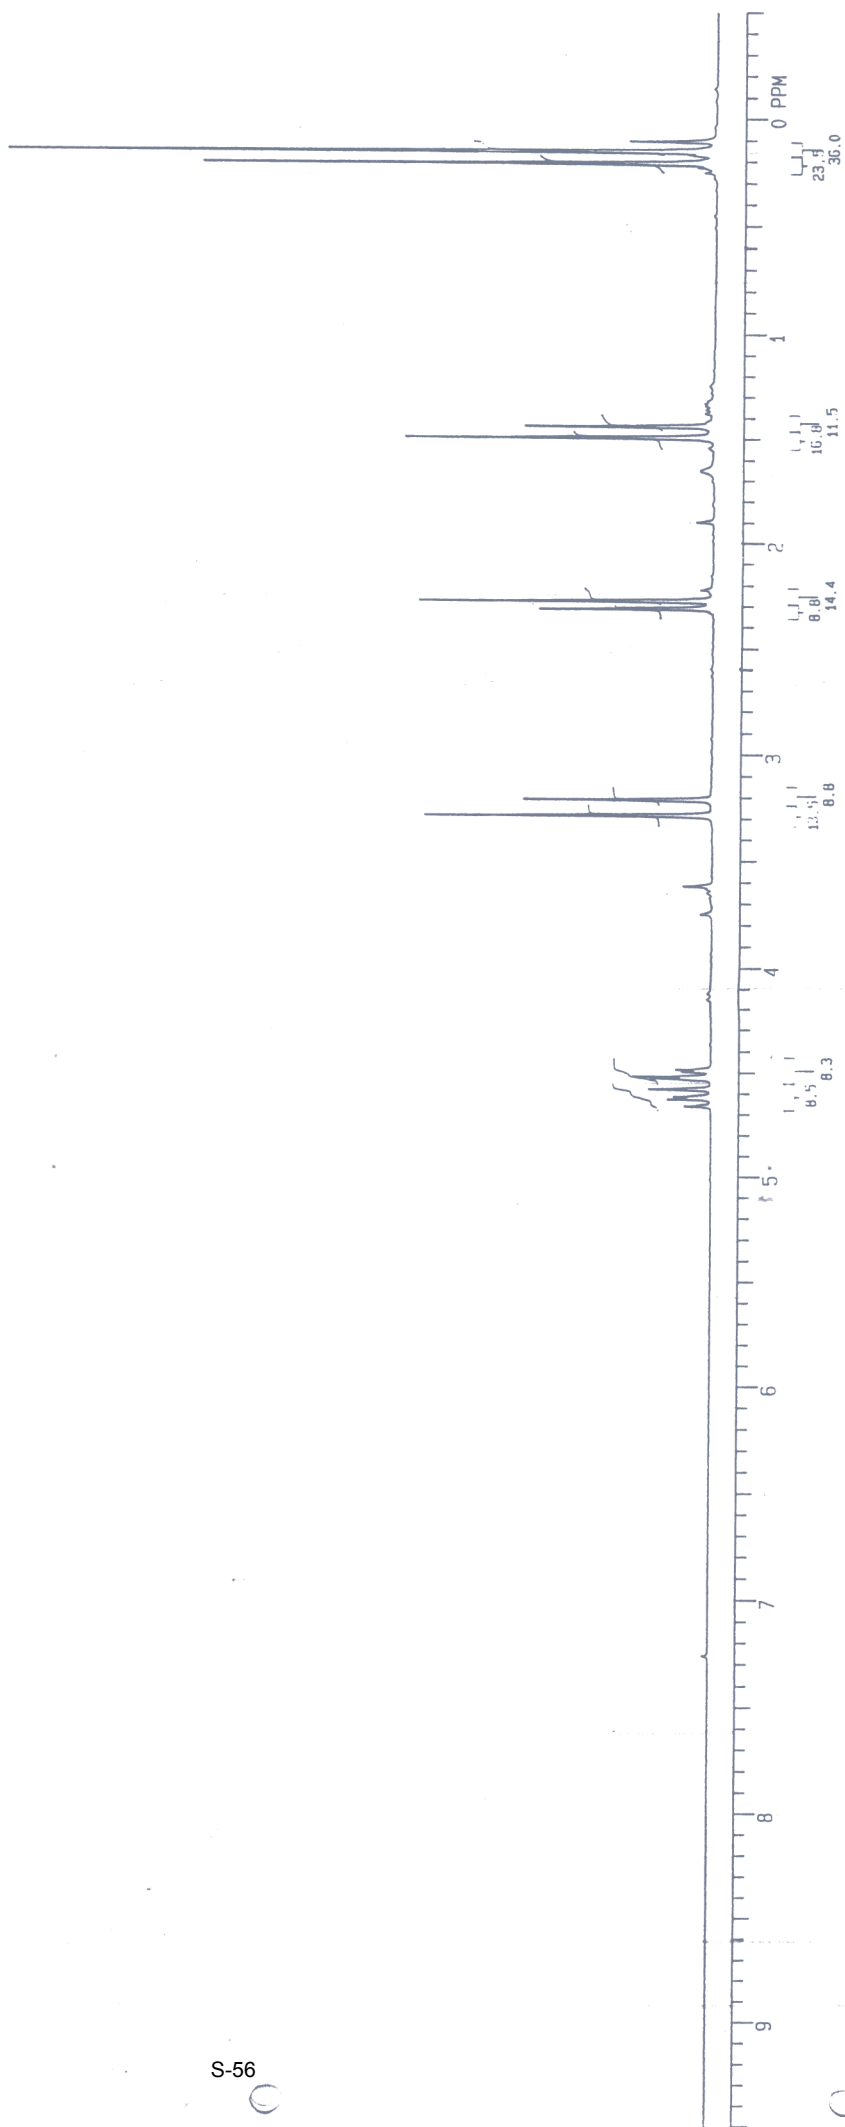

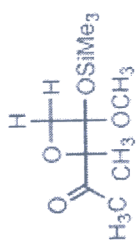

35a + 35b

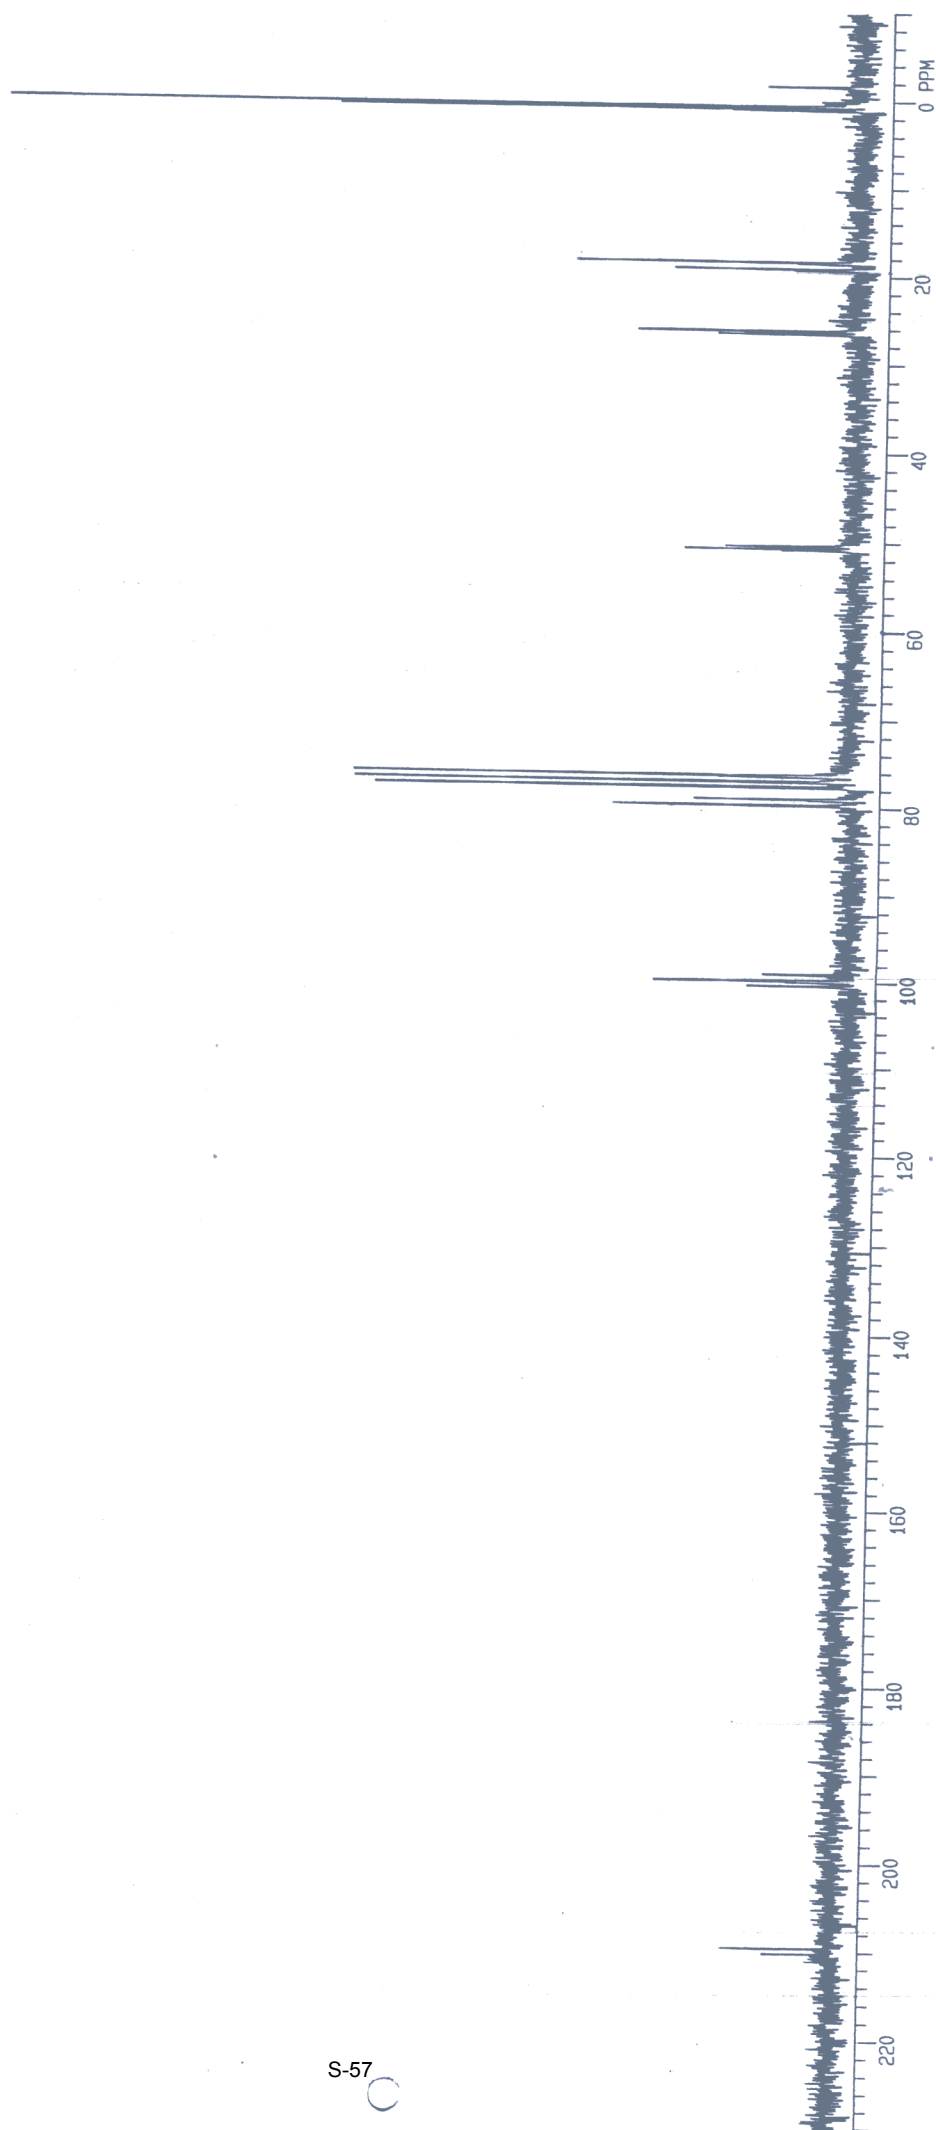

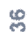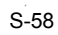

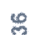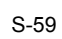



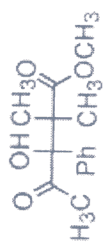

37

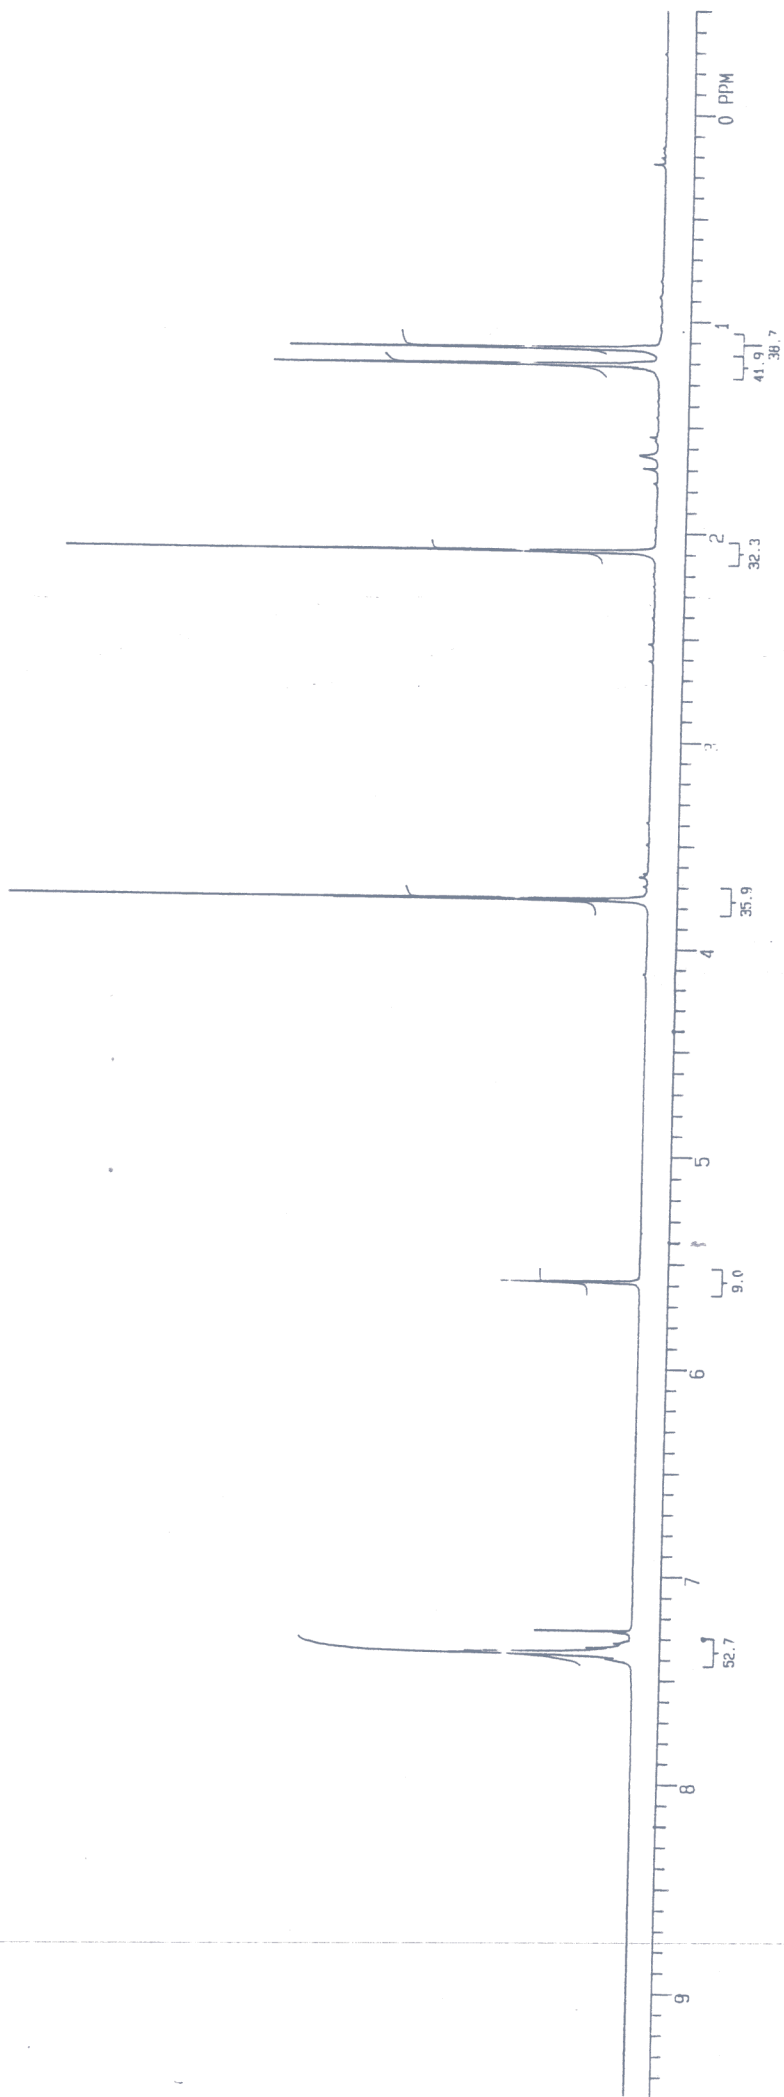

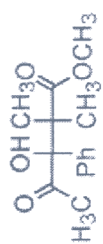

37

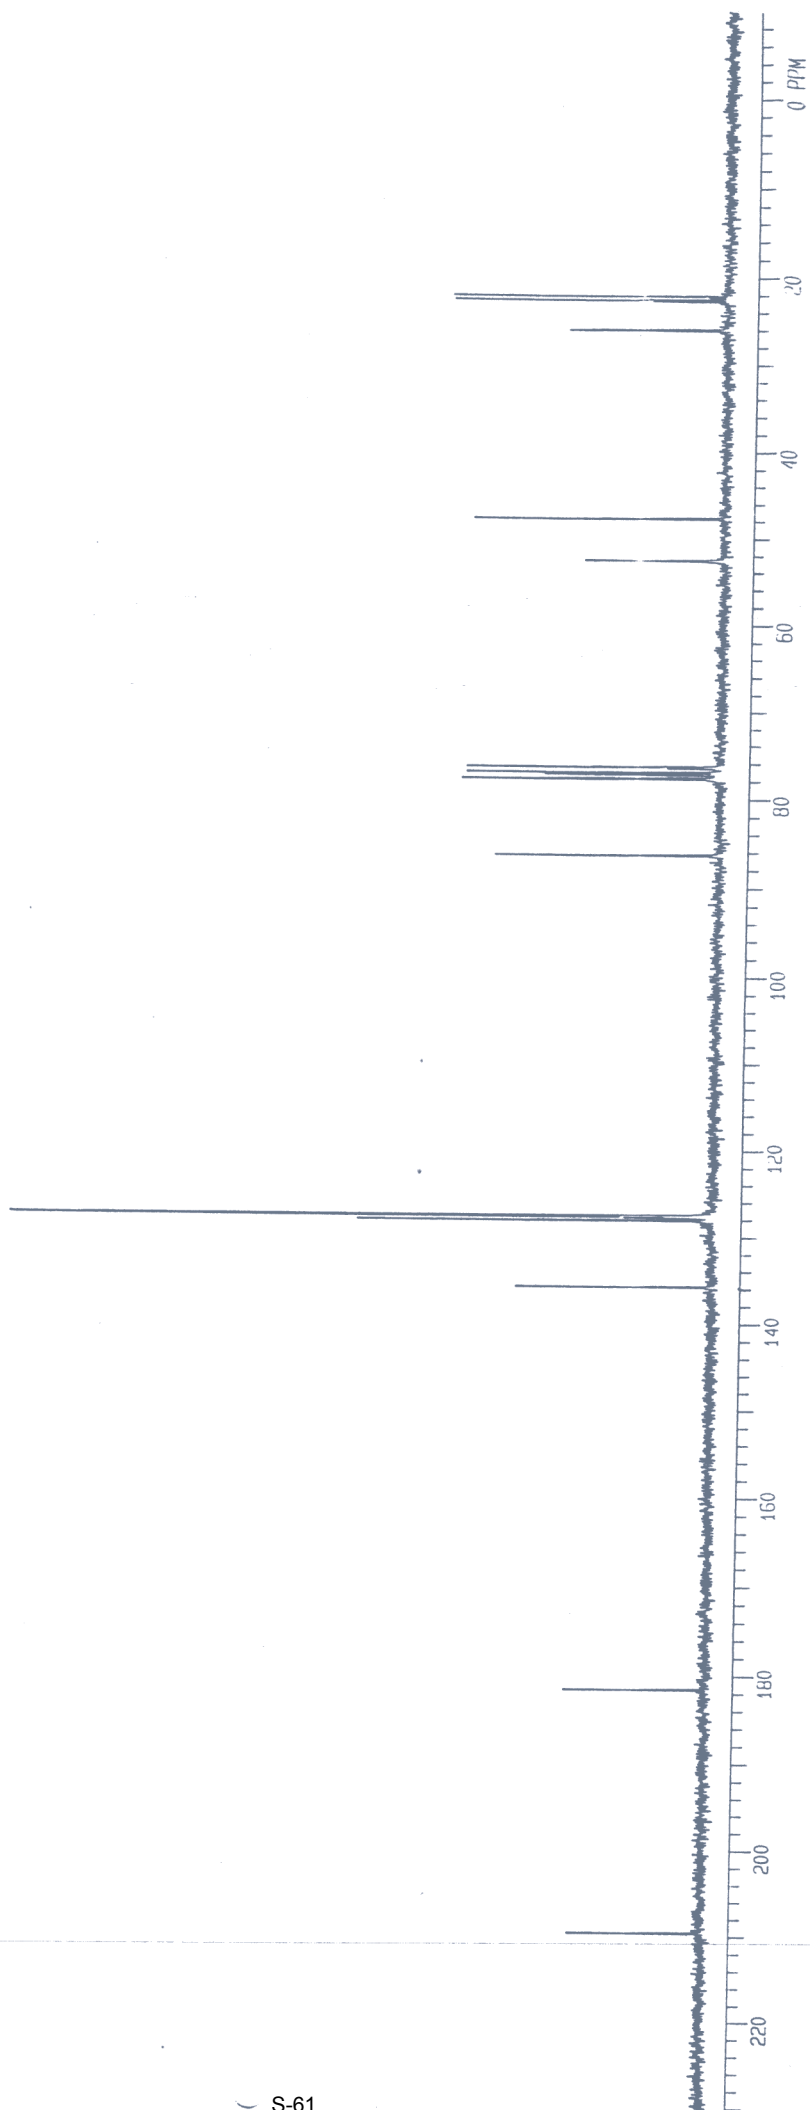

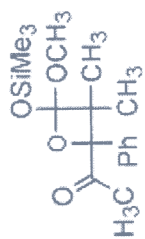

38a + 38b

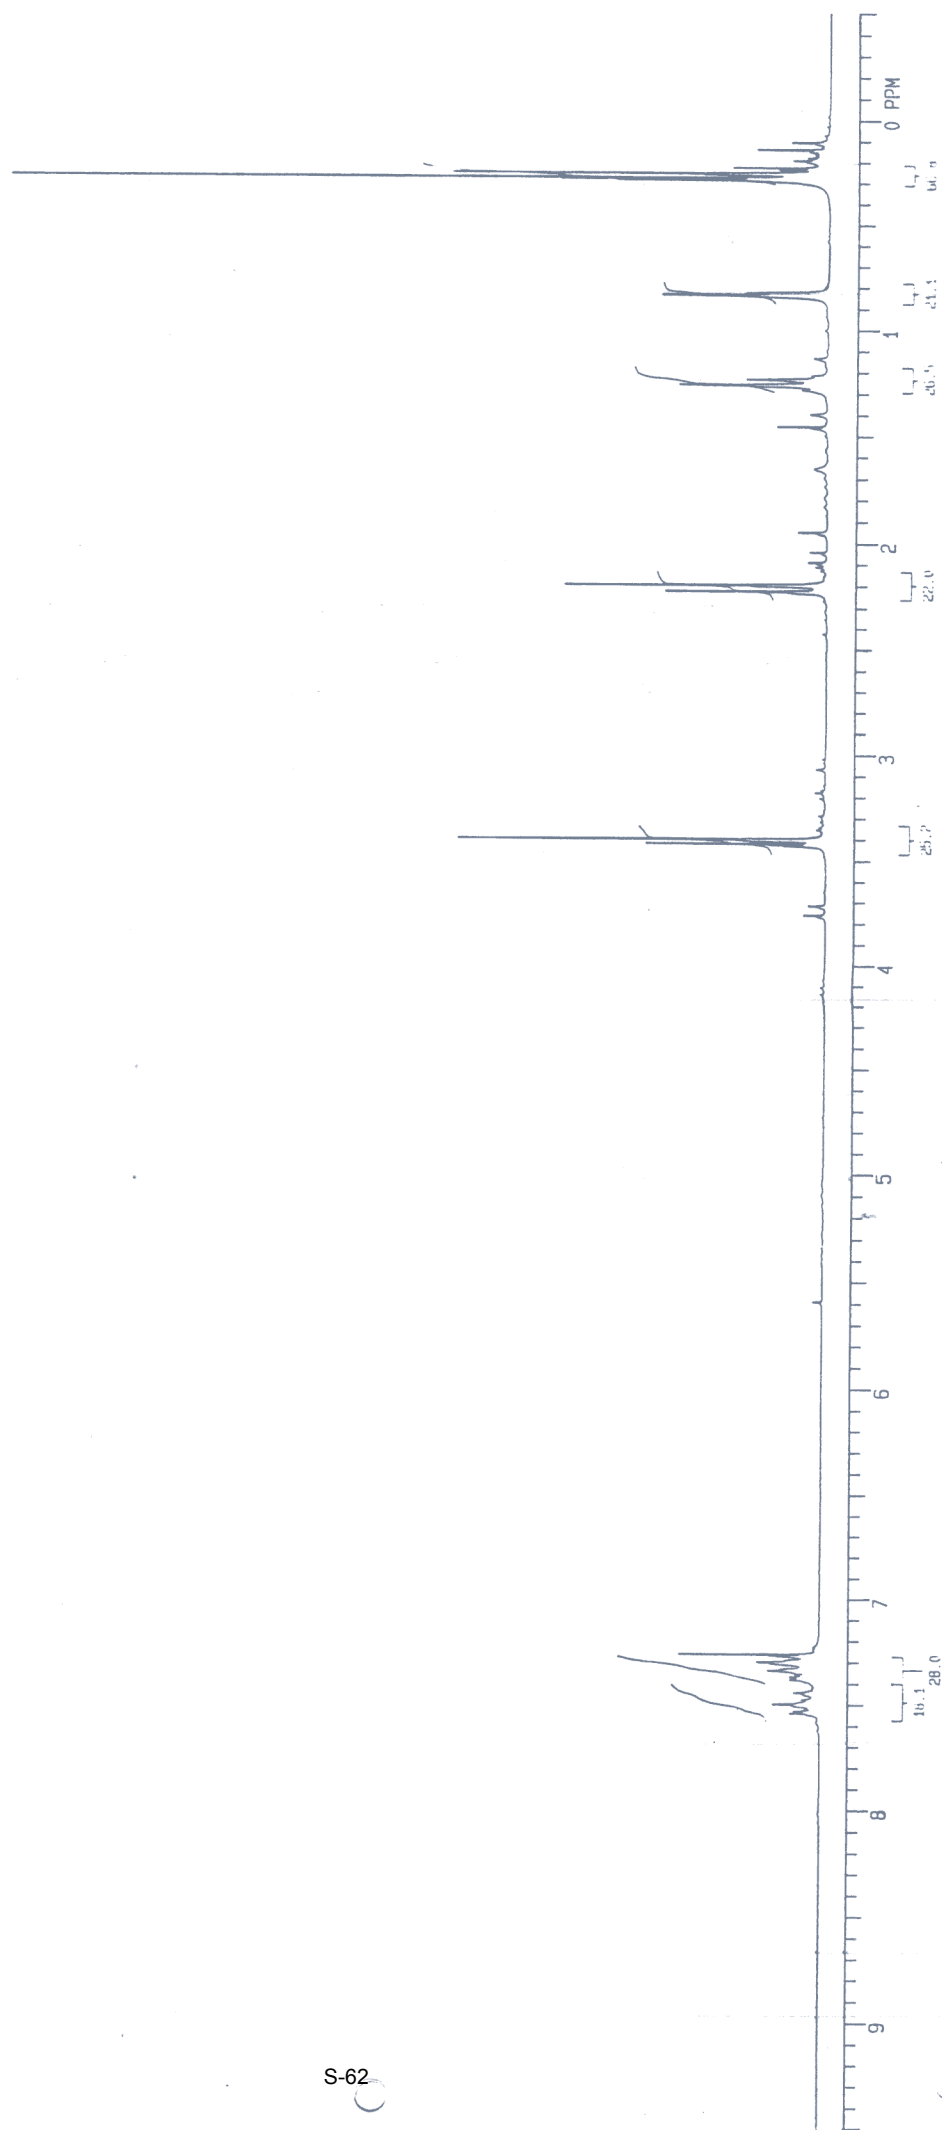

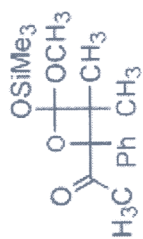

38A + 38B

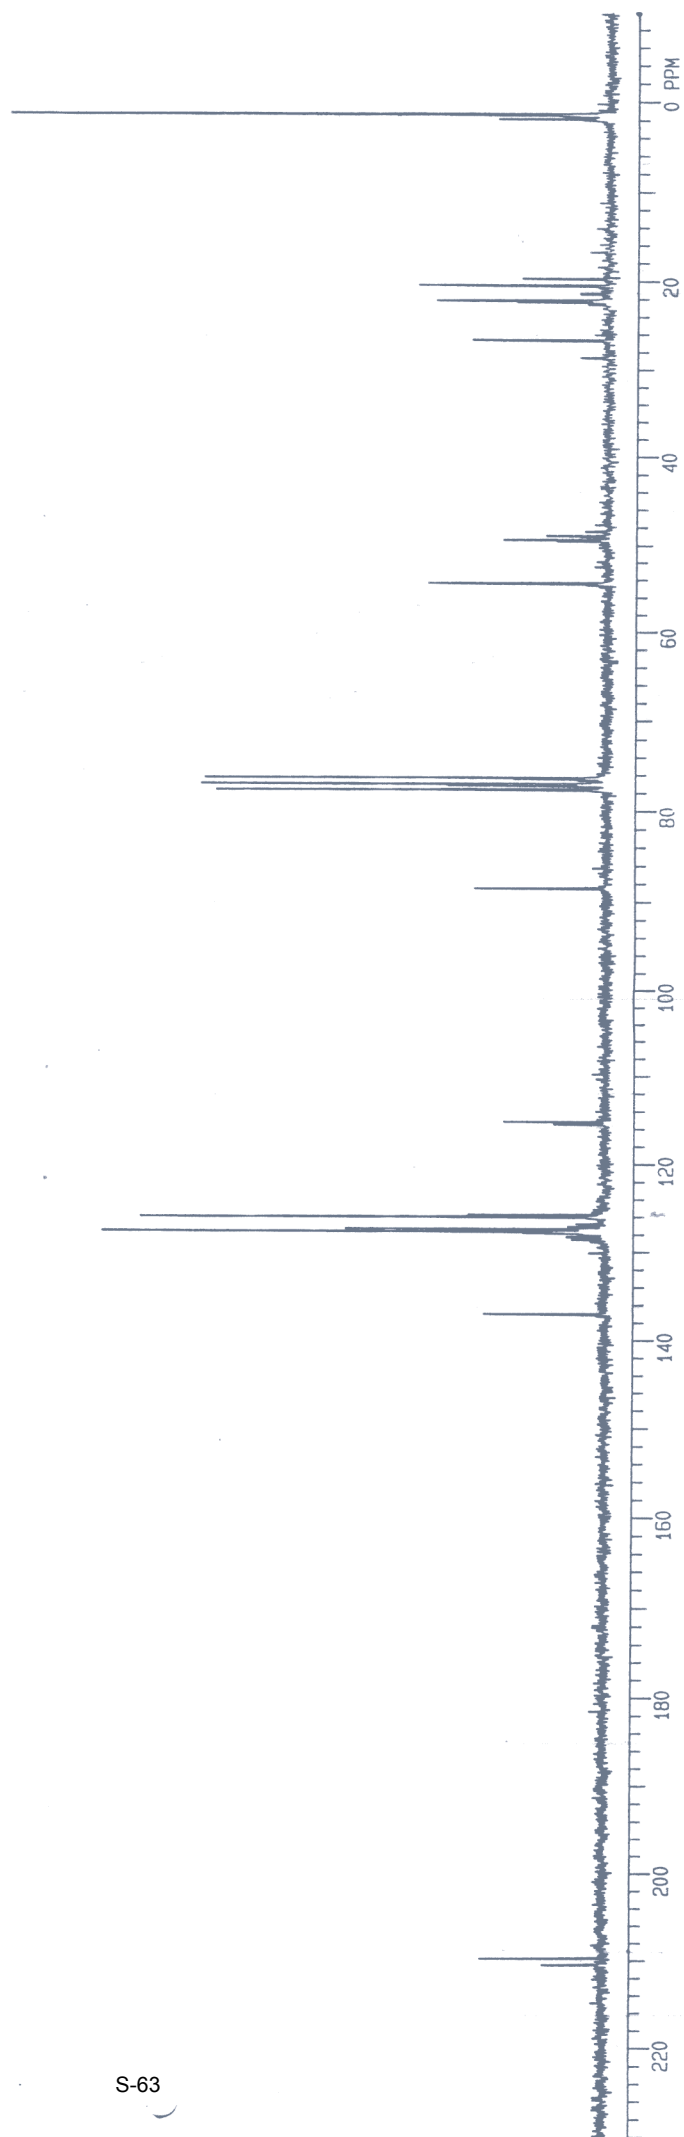

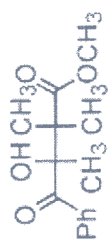

39

S-64

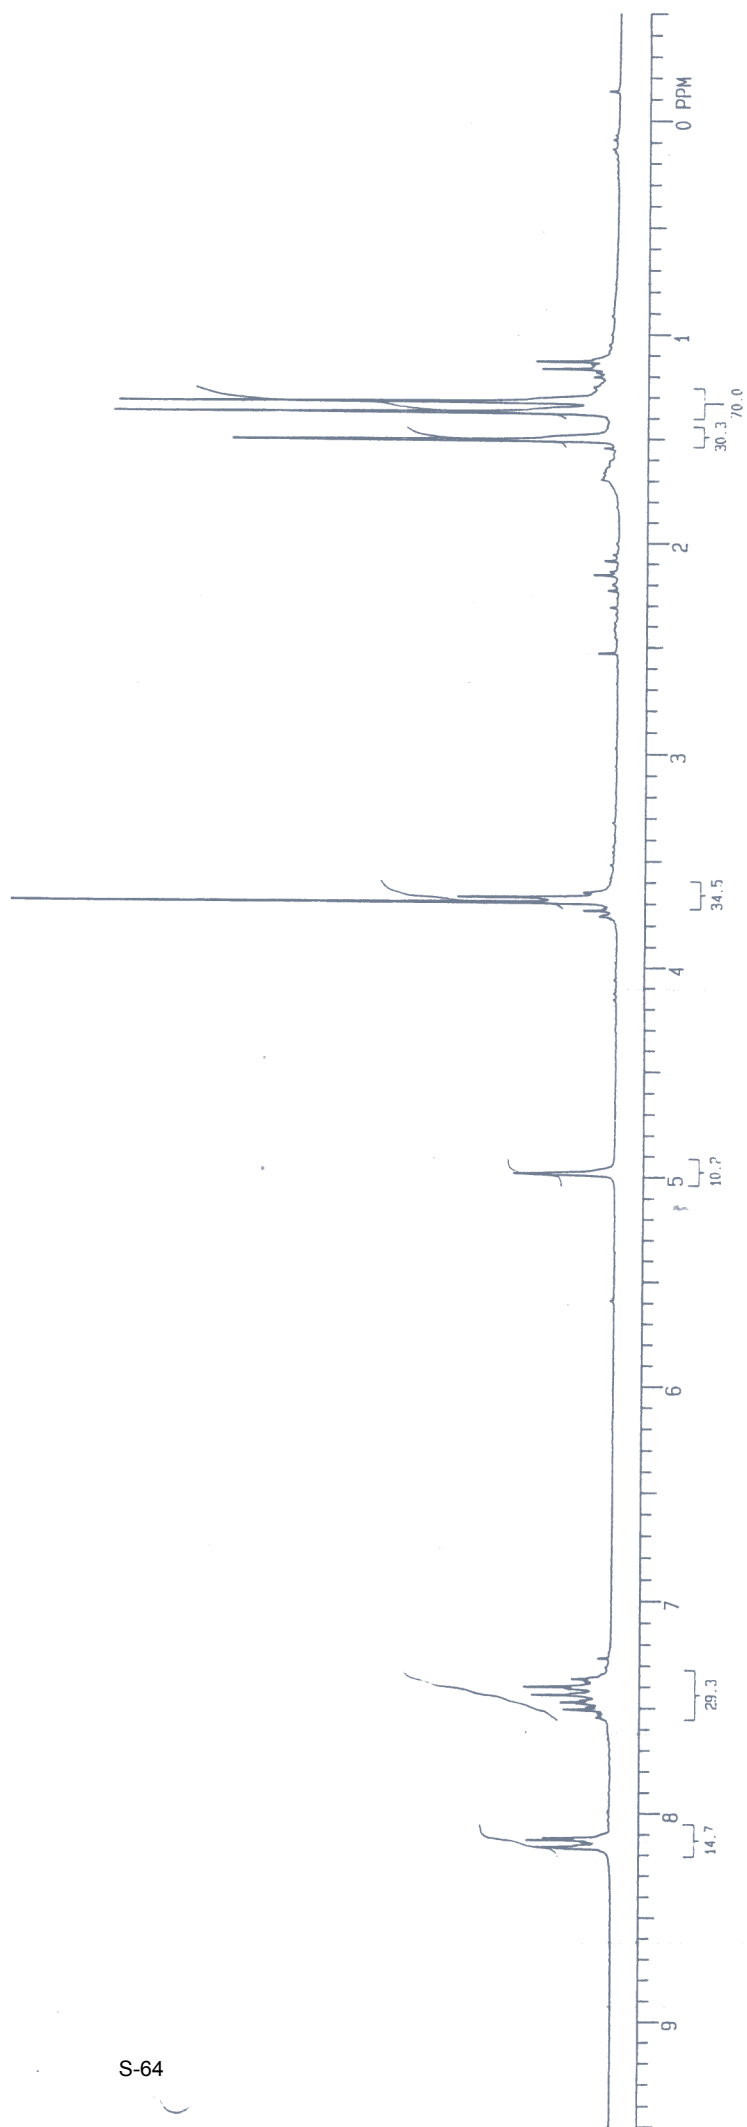

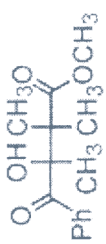

39

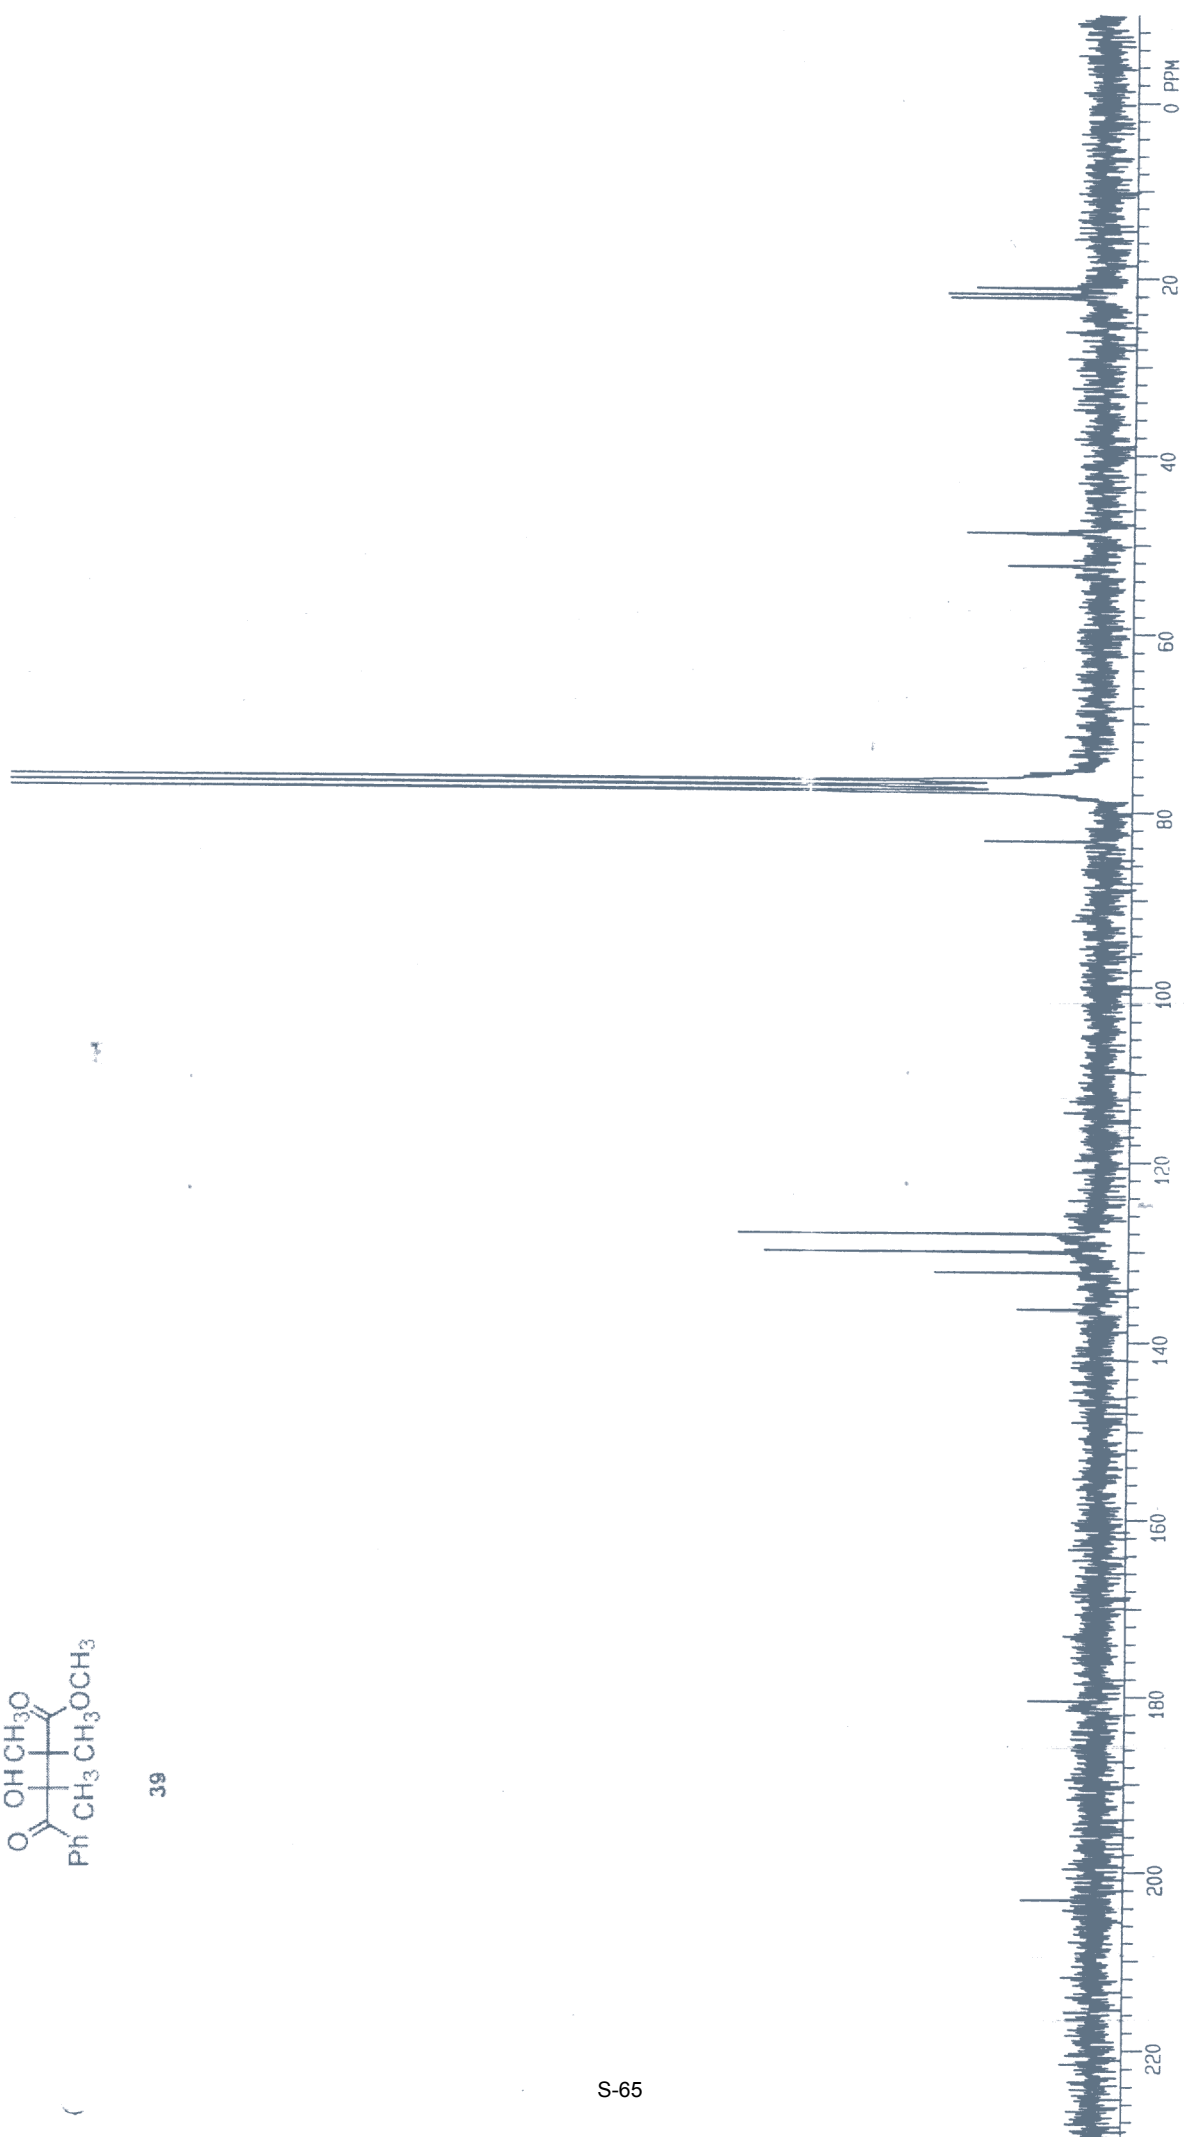

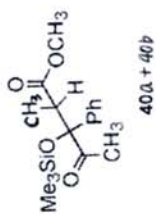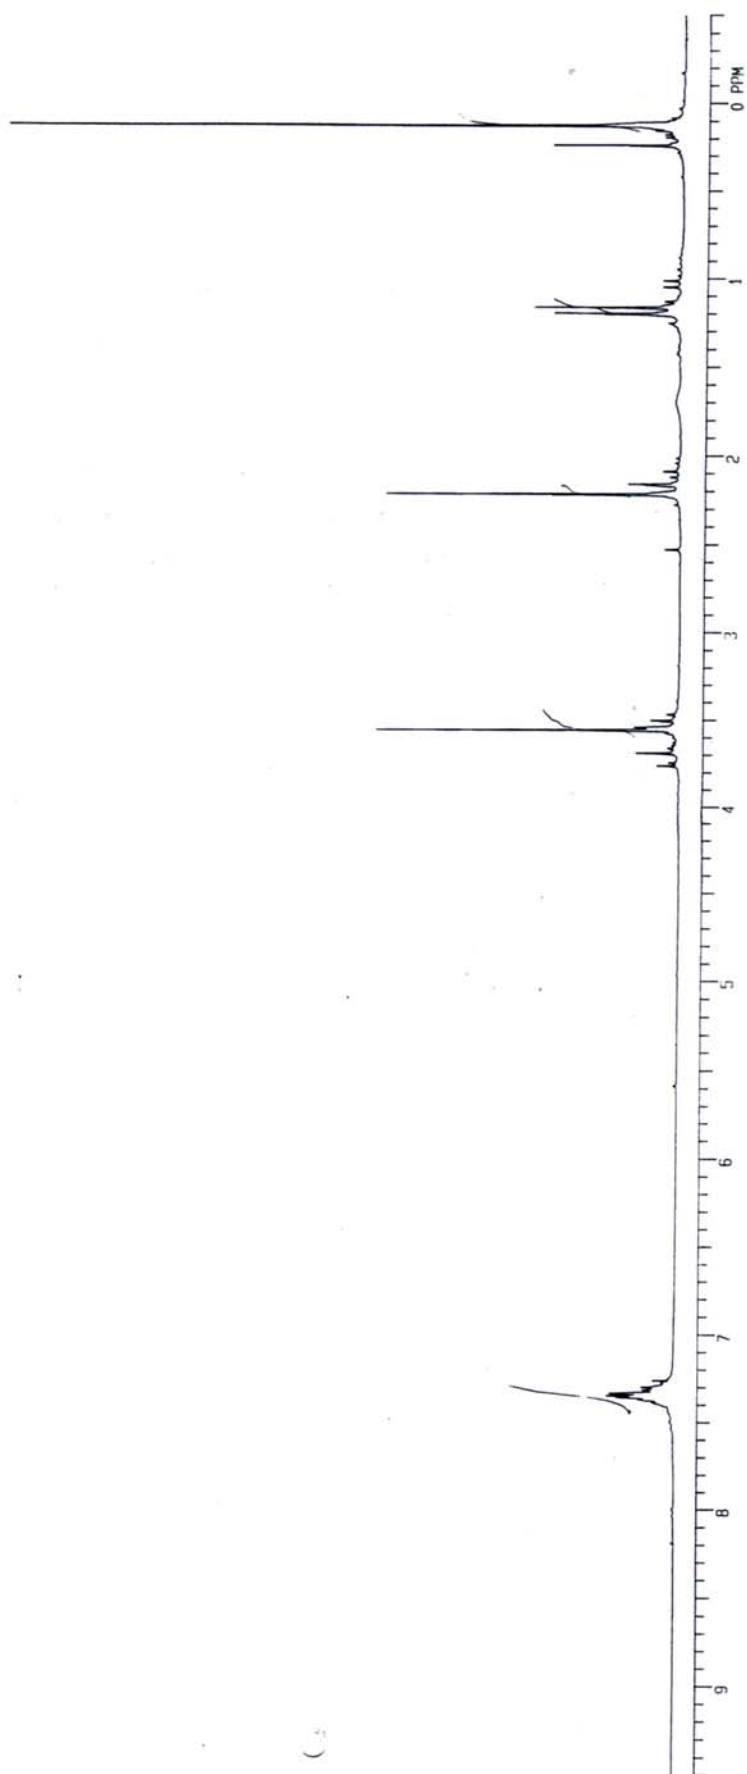

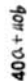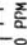



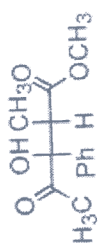

41A

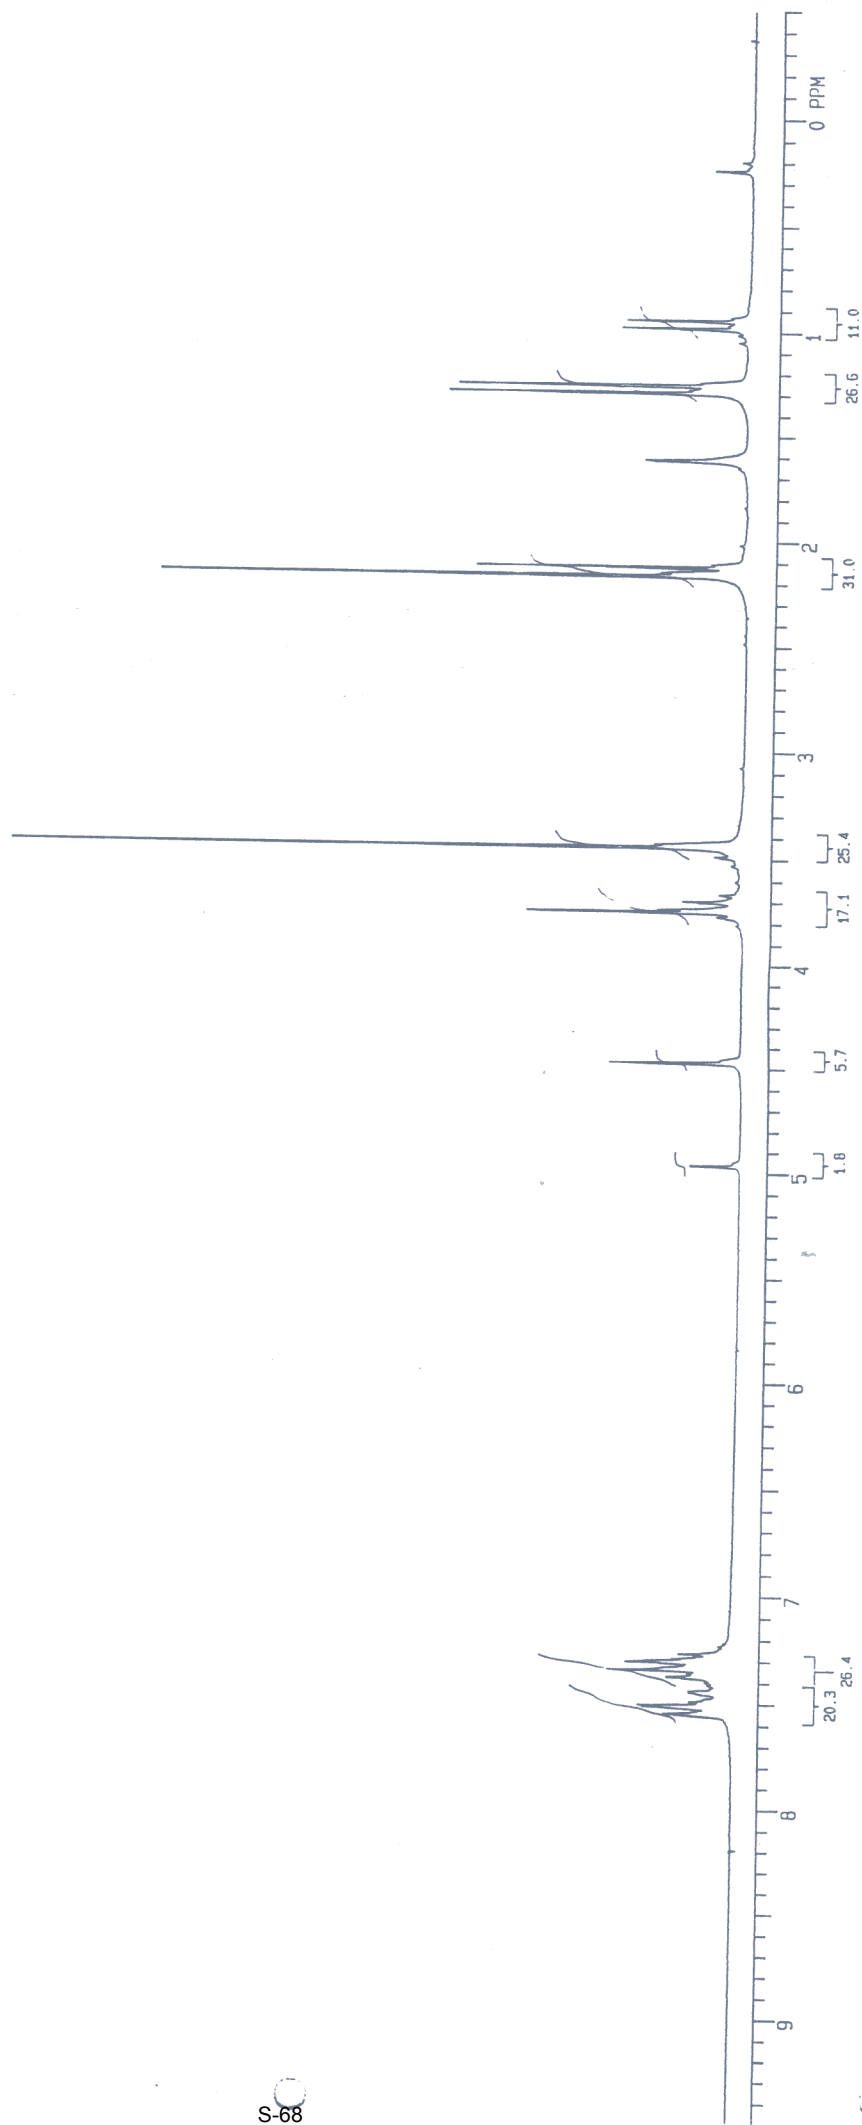

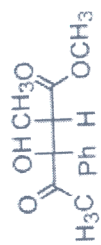

41a

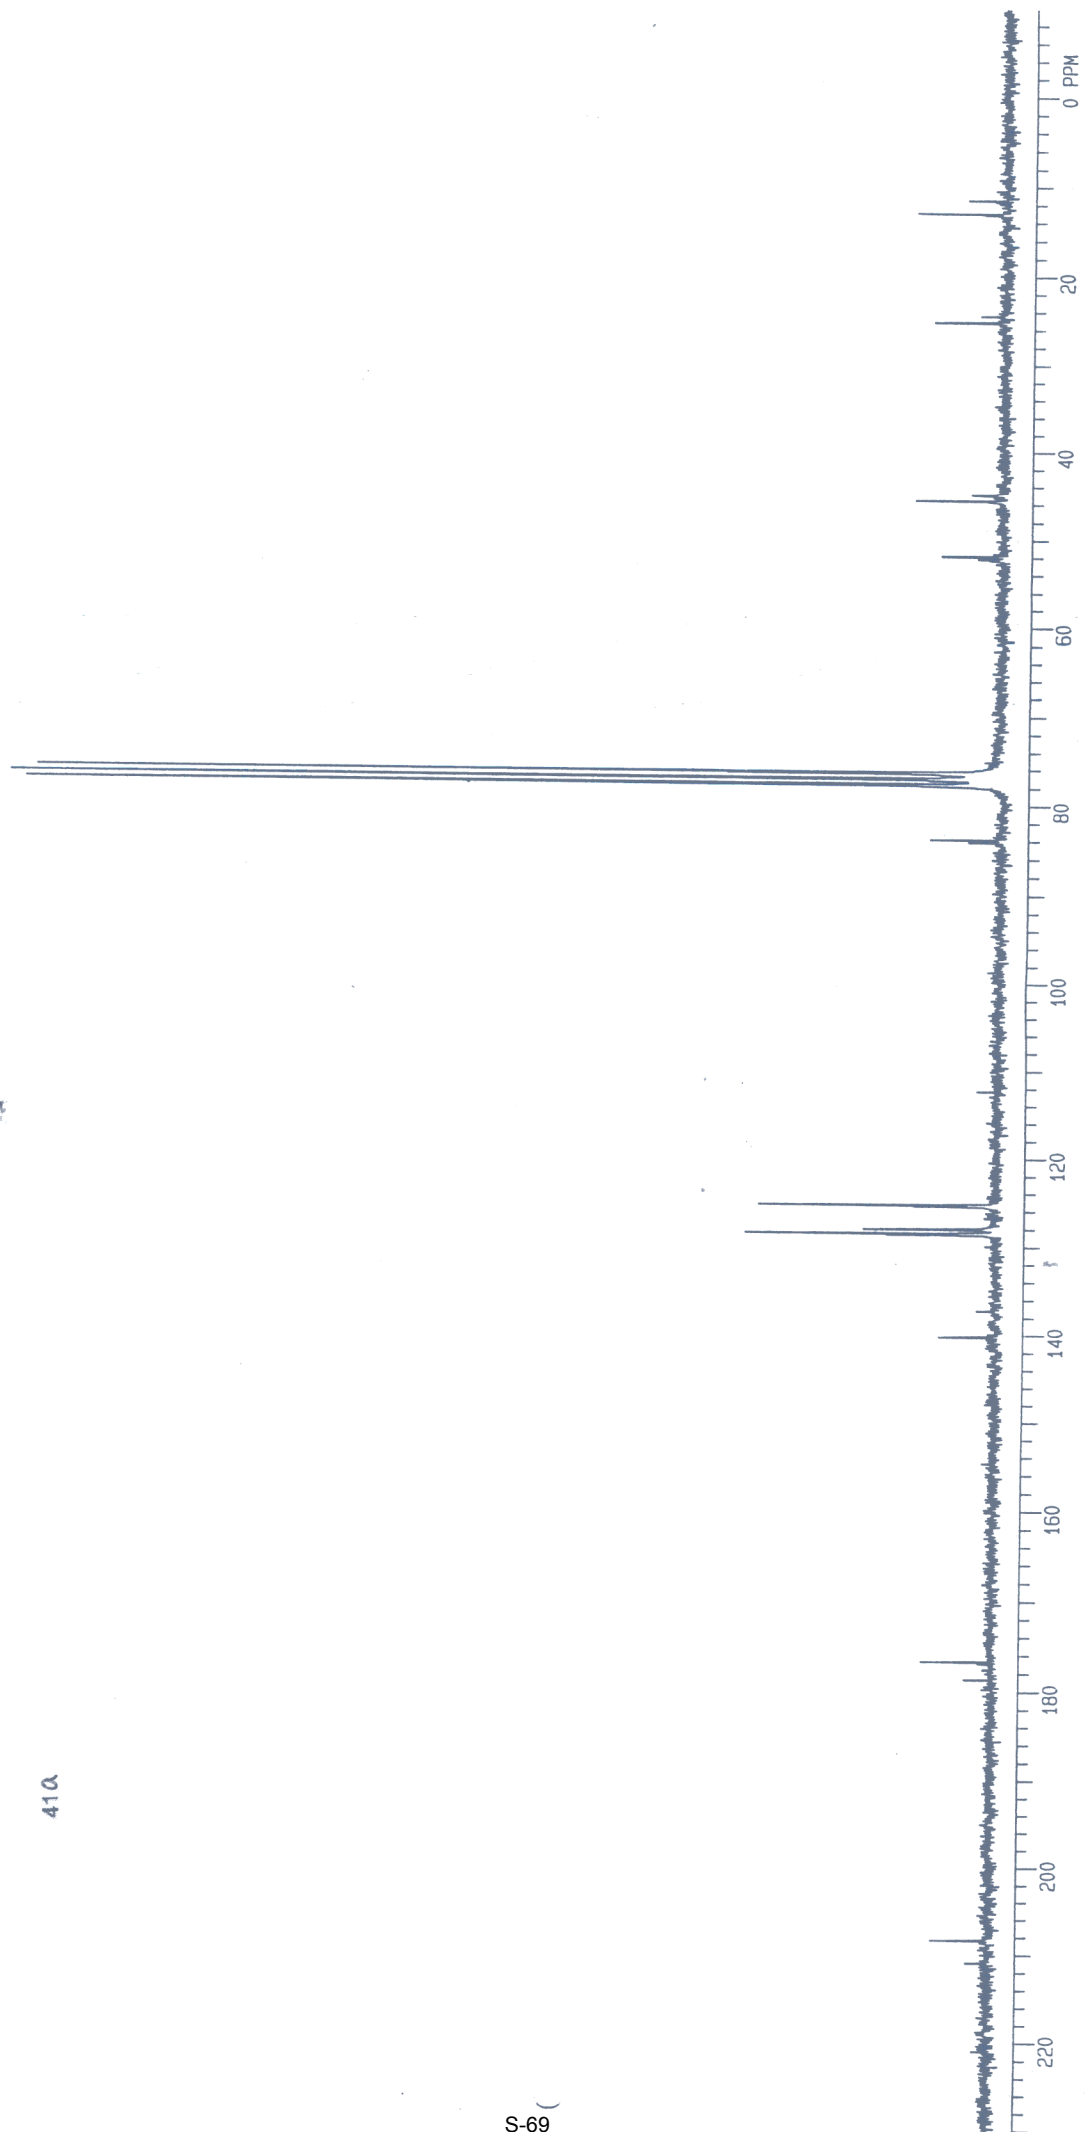

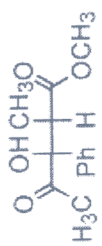

41b

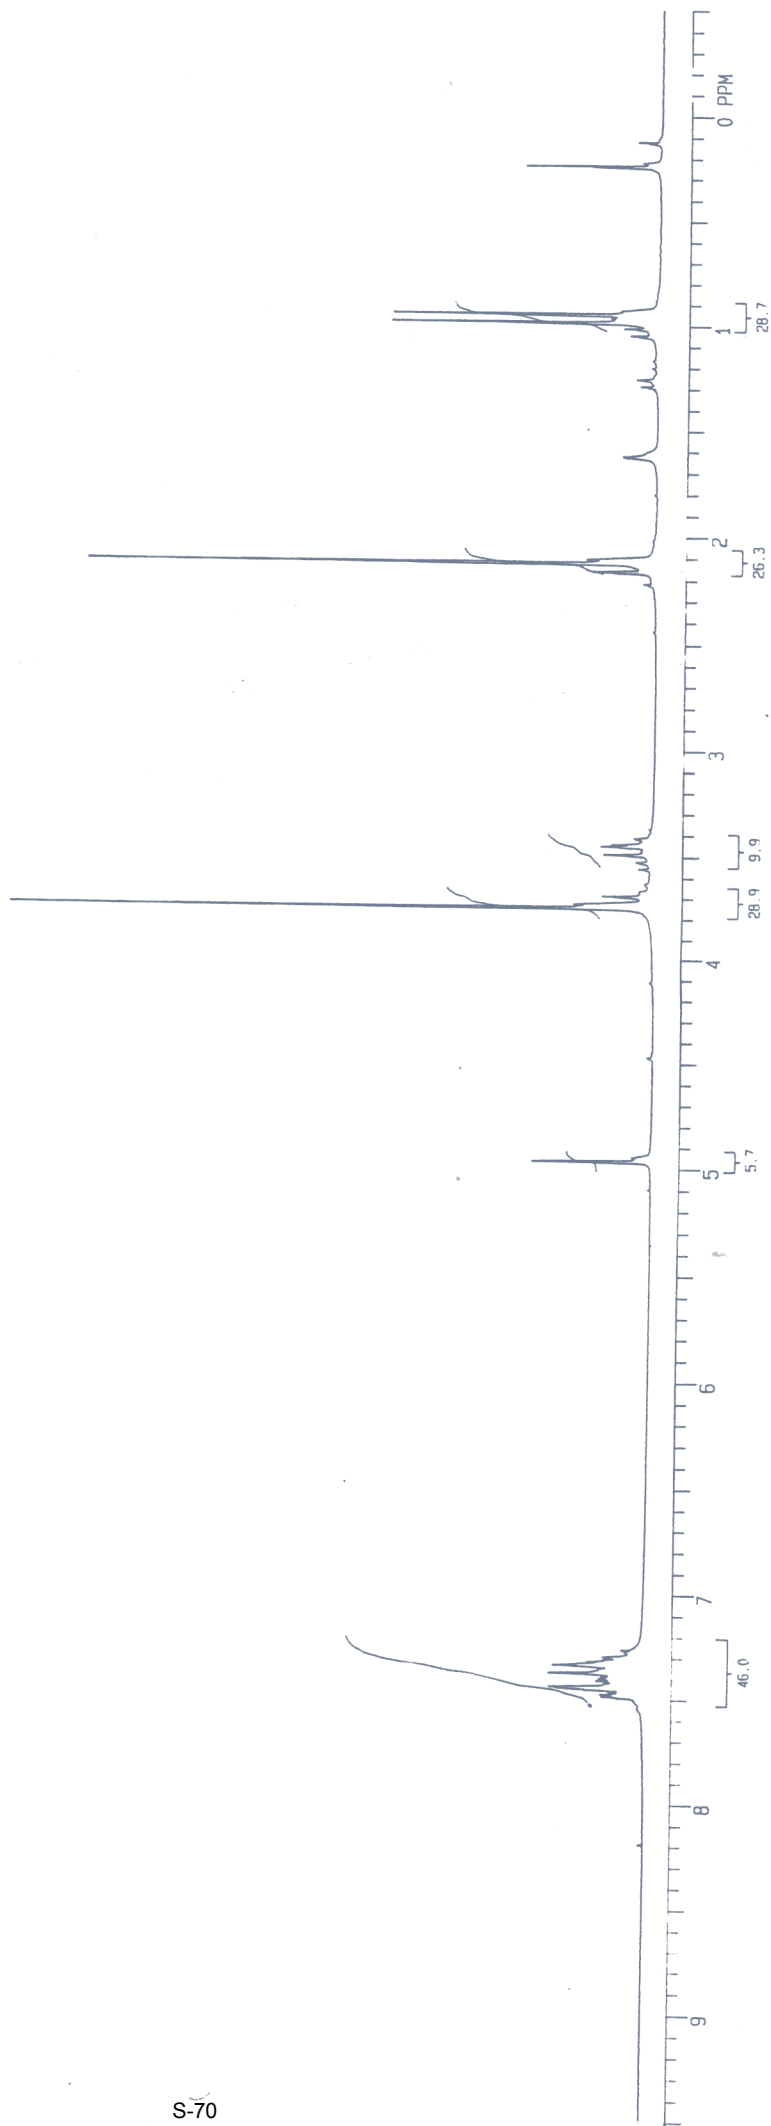

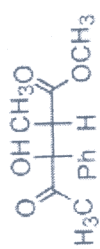

41b

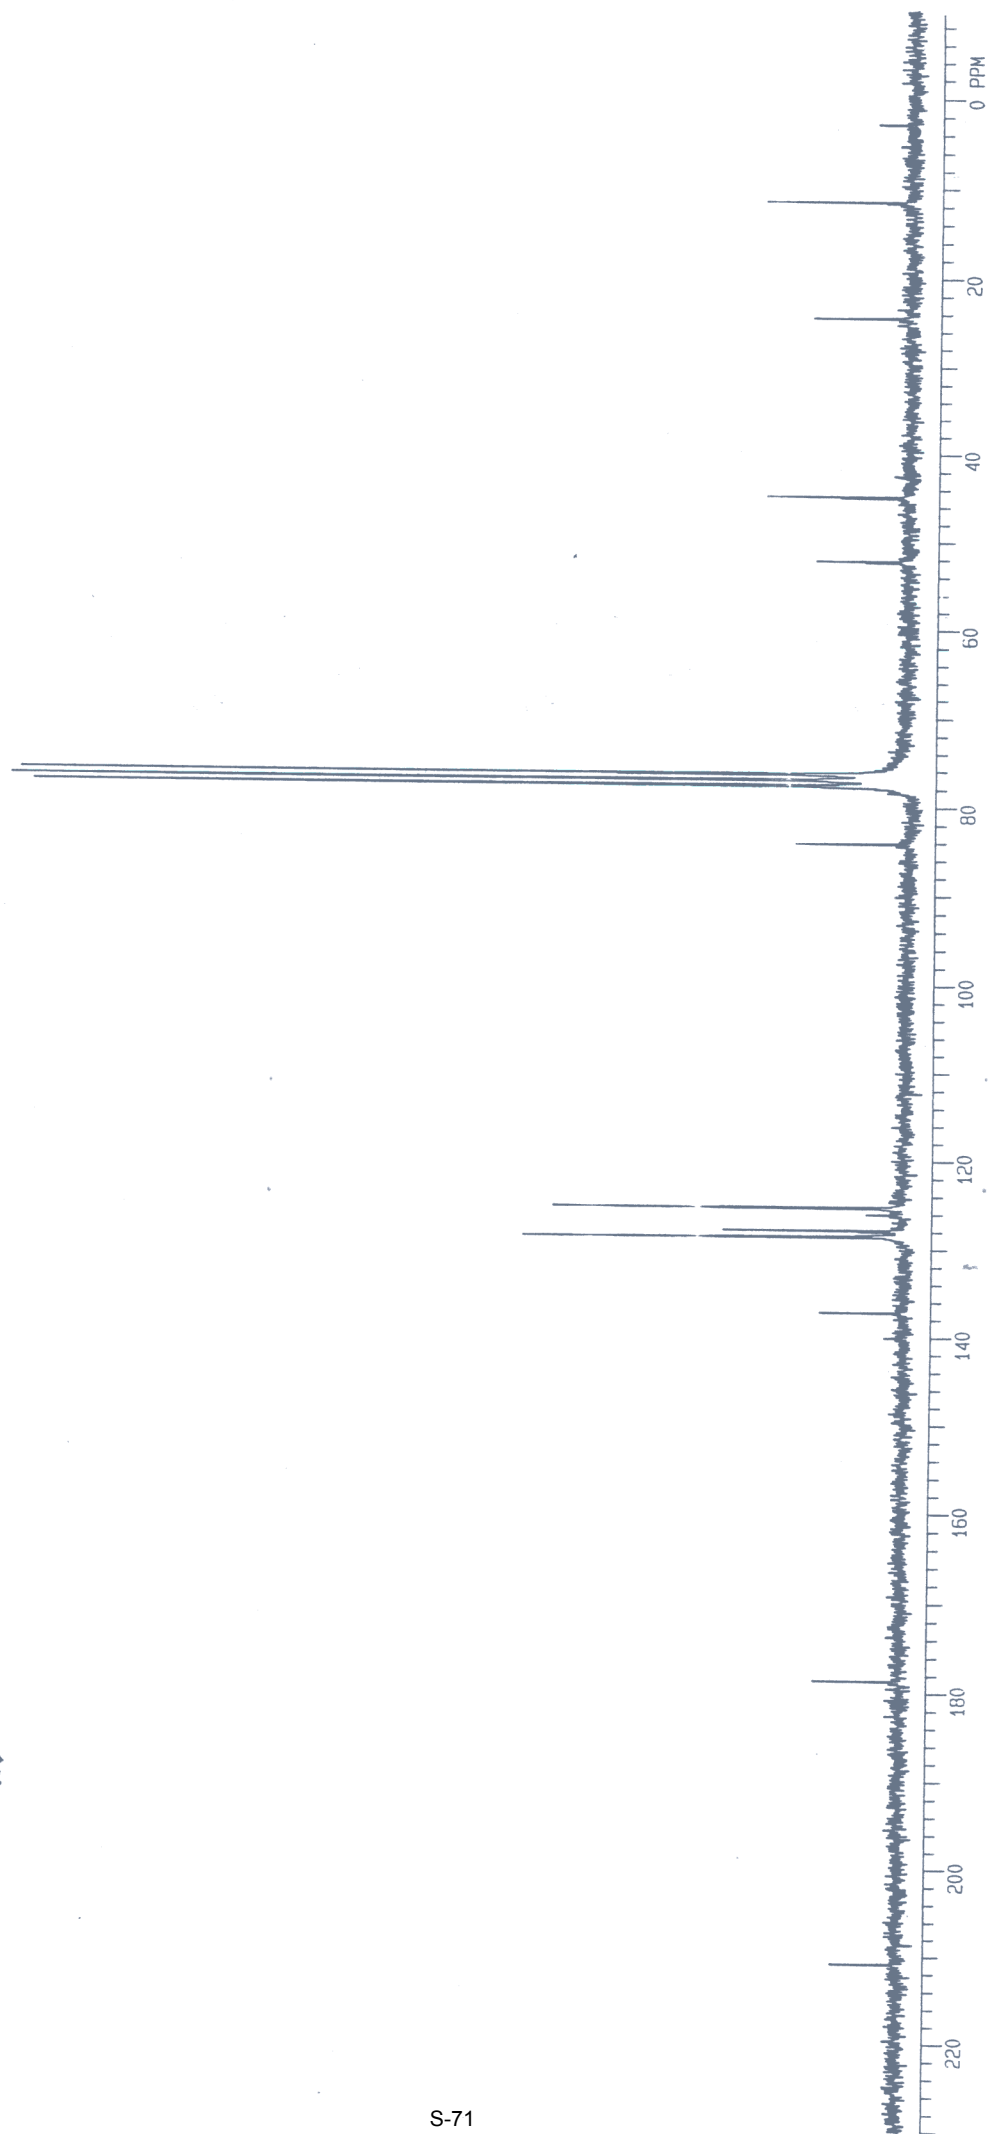

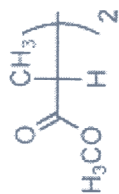

42

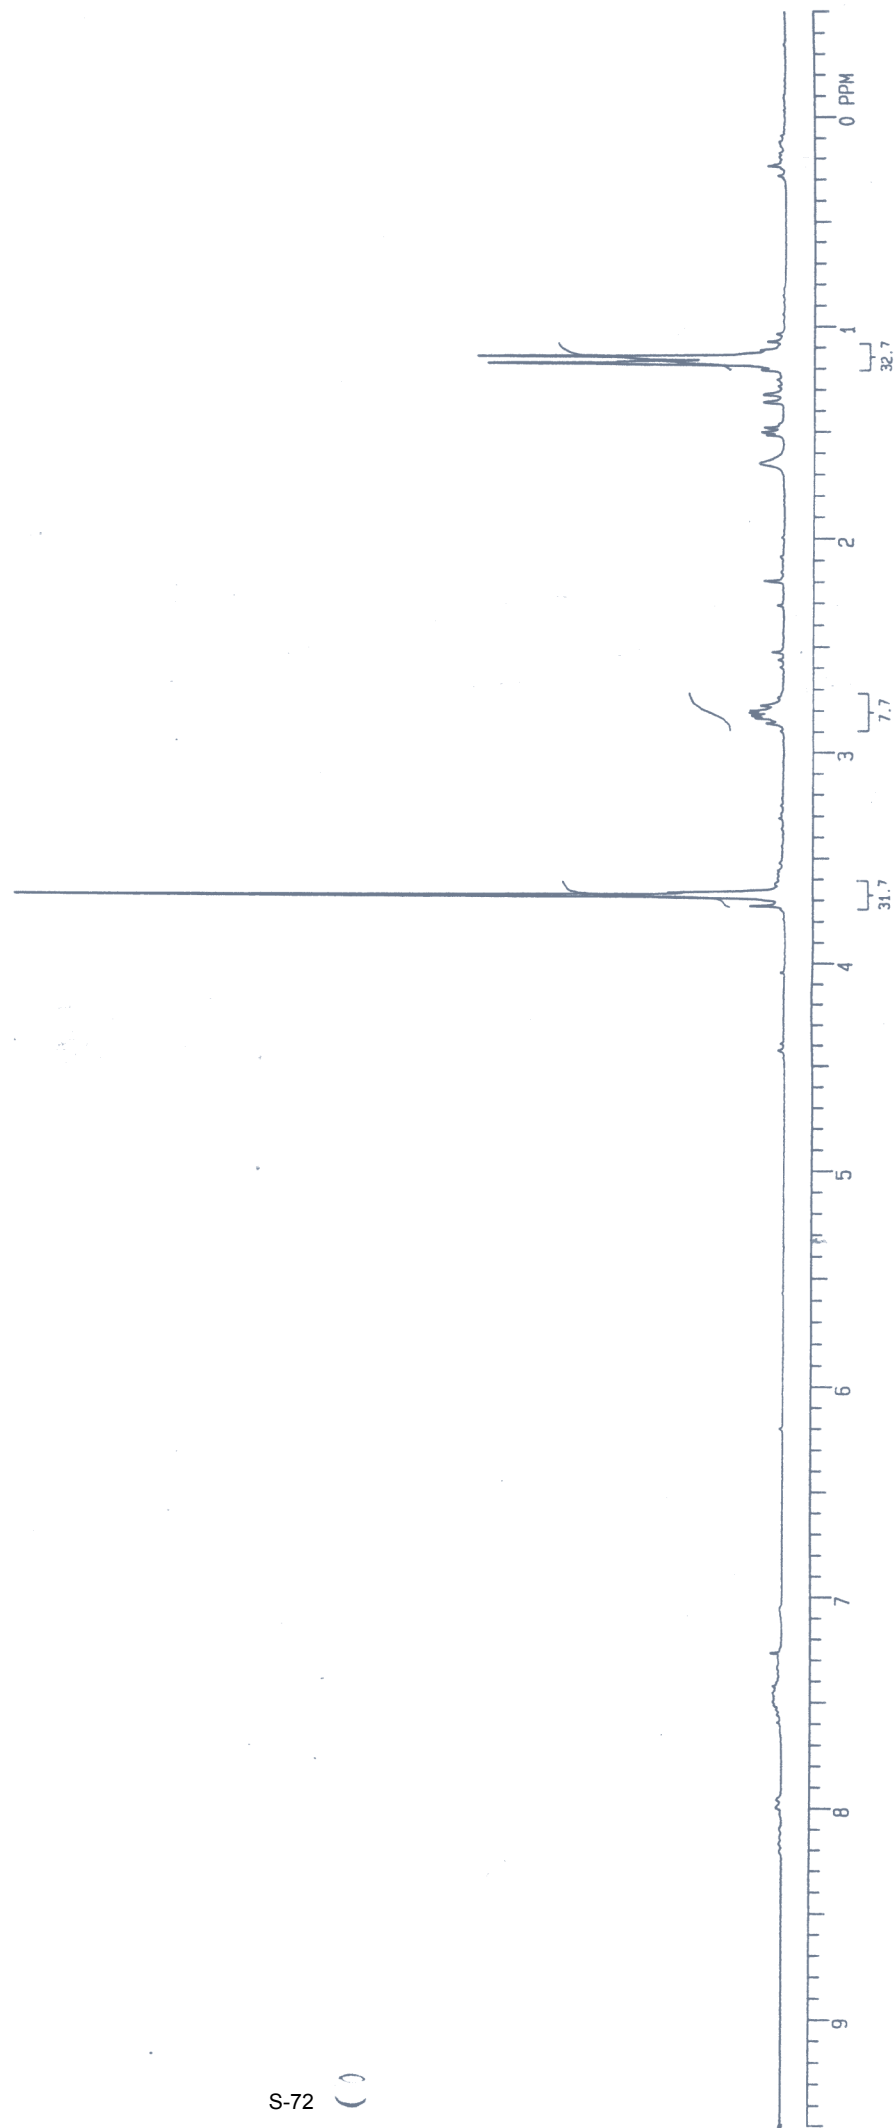

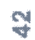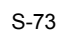

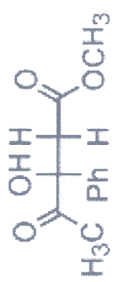

43

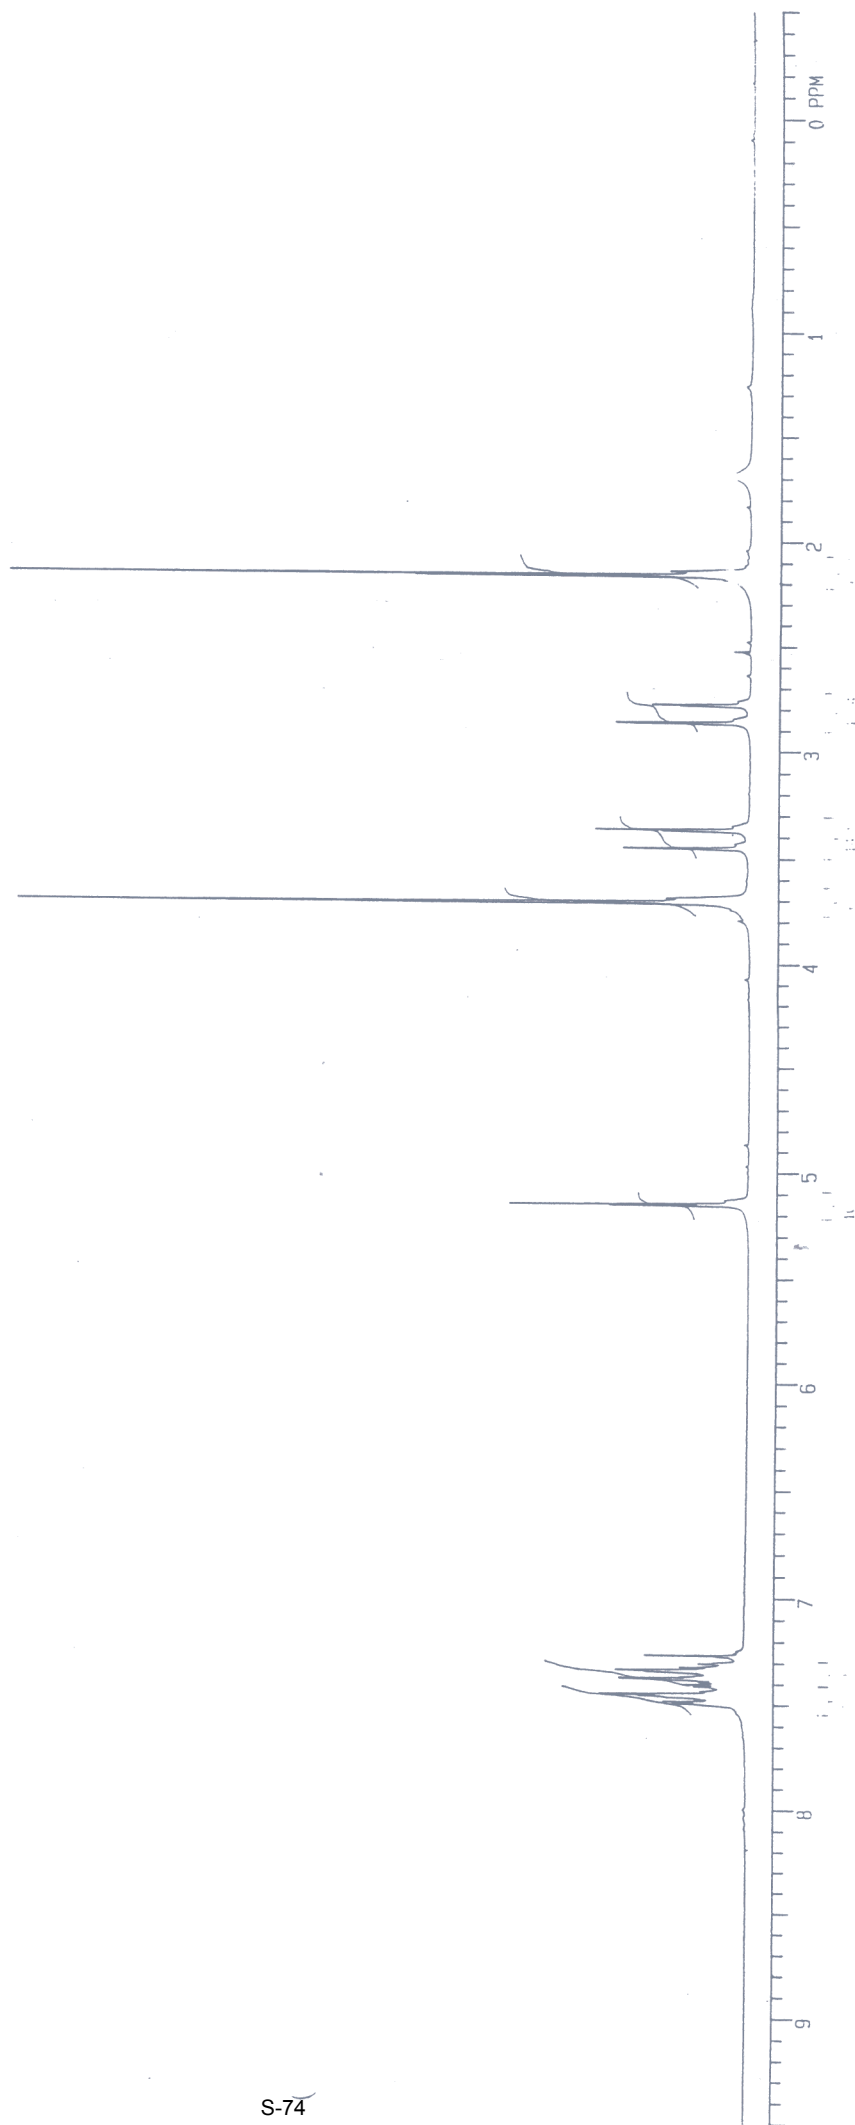

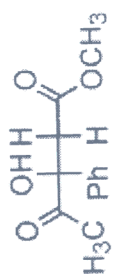

43

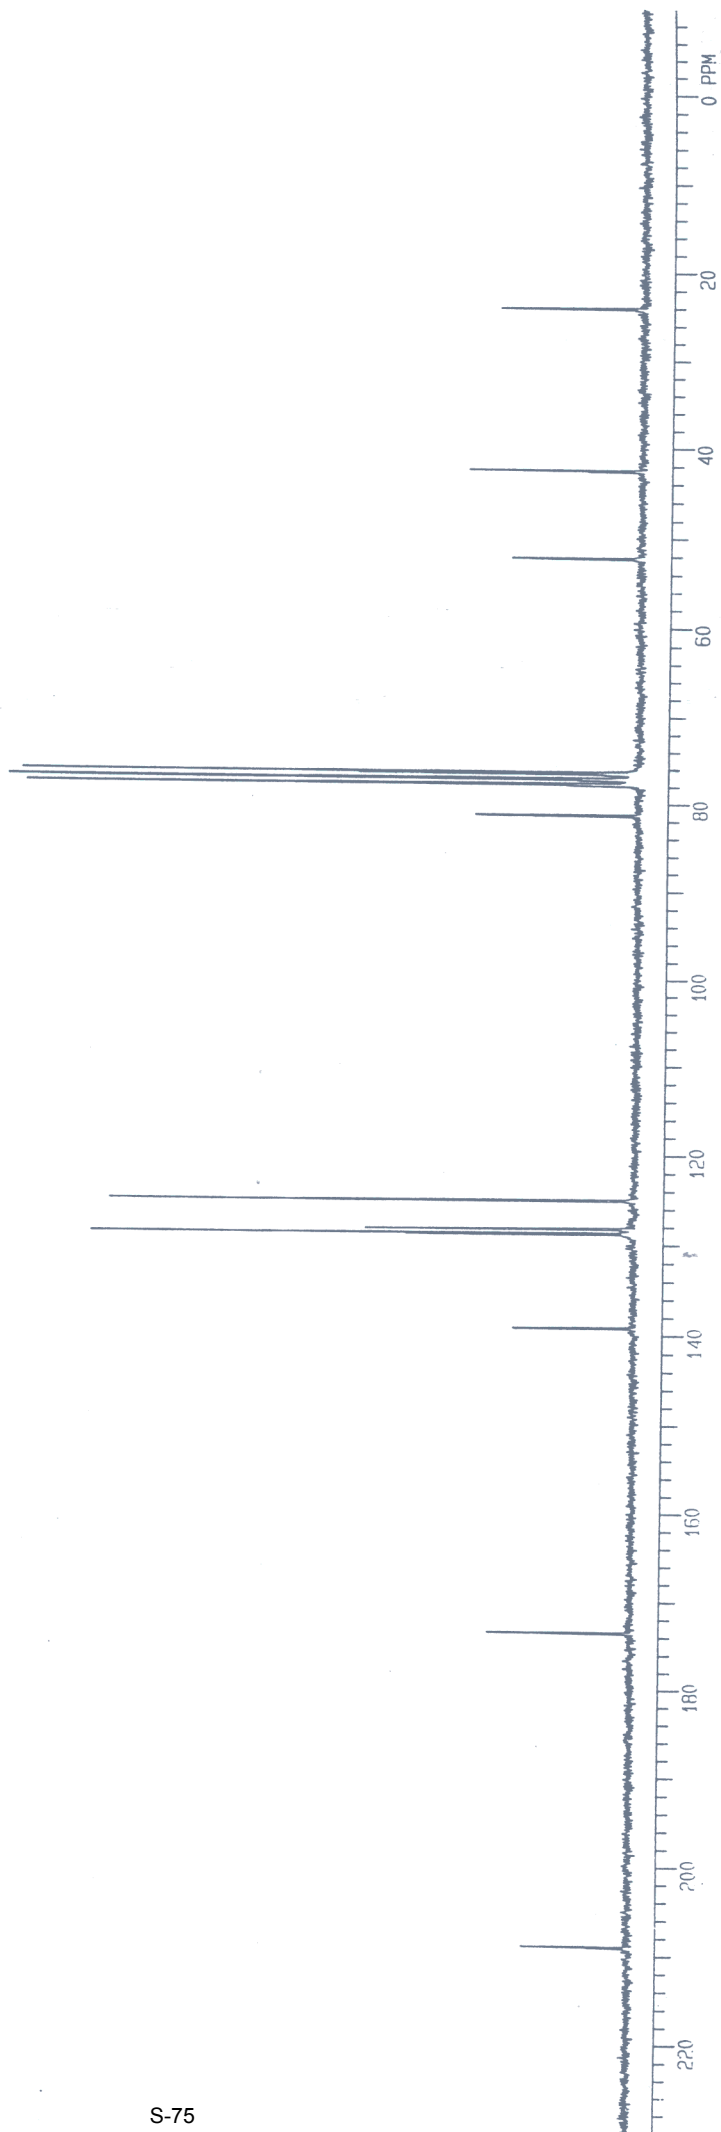



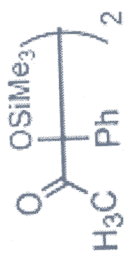

44

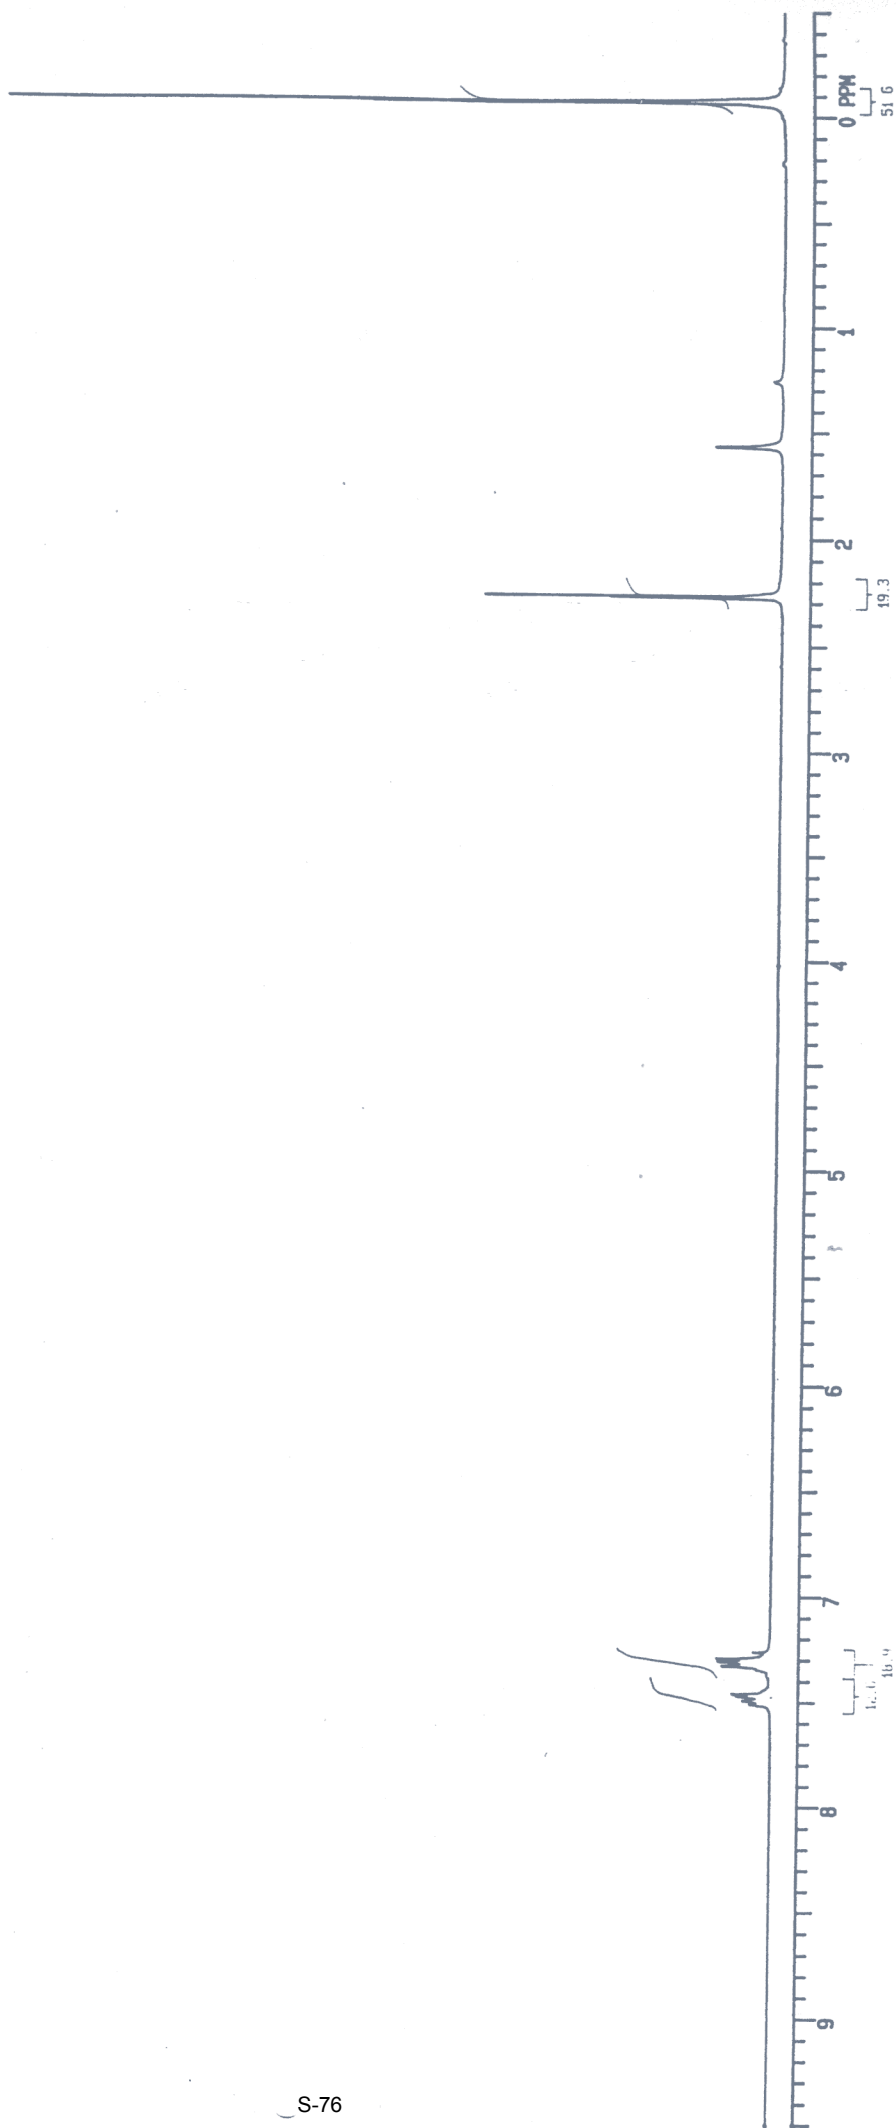

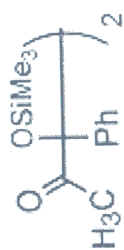

44

S-77

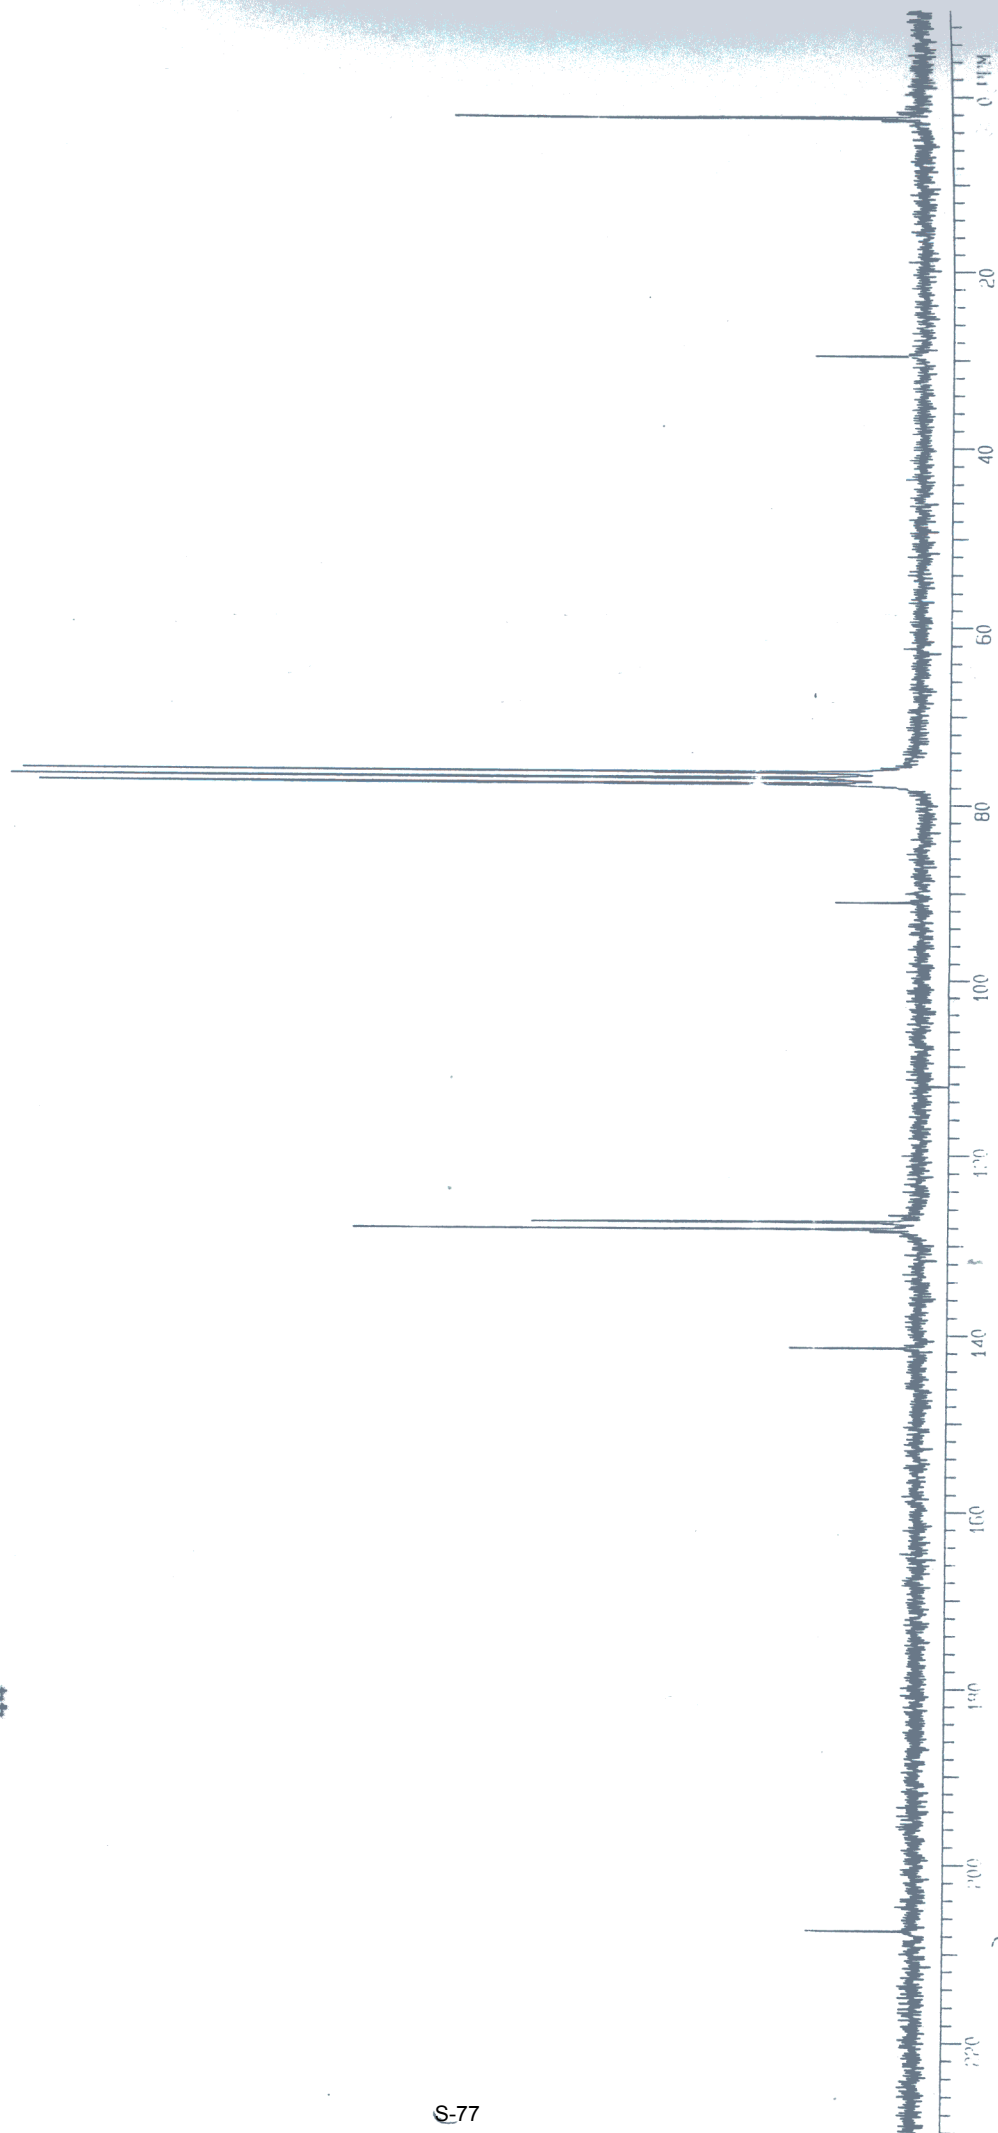

Supplement: Supplementary file 1 [file 4631242]
